# Supplementary material for: Transcriptional Networks Identify BRPF1 as a Potential Drug Target Based on Inflammatory Signature in Primary Lower-Grade Gliomas
Source: Front Oncol. 2021 Dec 2;11:766656. doi: 10.3389/fonc.2021.766656 (PMC8674185; doi:10.3389/fonc.2021.766656)
Supplement: Supplementary file 2 [file Table_1.xlsx]

## Sheet: 6,089 DEGs
gene	logFC	AveExpr	t	P.Value	adj.P.Val	B
HMGN1P37	10.2069	-5.1807	51.877	0	8.31809e-307	701.139
RP11-64K7.1	7.11127	-6.29164	42.4918	5.48806e-243	6.66544e-239	545.223
HMGN2P17	6.88611	-6.75123	40.9737	1.2291e-231	1.02588e-227	519.211
MYL2	-10.2123	-3.47483	-40.9694	1.40778e-231	1.02588e-227	519.076
HNRNPCP2	3.63284	0.992361	37.5839	4.51041e-206	2.73902e-202	460.608
HMGN1P36	9.64357	-5.09173	36.6838	3.14955e-199	1.63939e-195	444.916
RP11-452D2.2	7.4279	-6.42248	36.5816	1.87336e-198	8.5322e-195	443.14
F2R	4.3071	0.961262	35.6456	2.28807e-191	9.26312e-188	426.89
NPAP1	-6.15842	-8.24911	-34.5157	8.85096e-183	3.22494e-179	407.197
RALGAPA1P	3.68246	-1.35723	34.404	6.17712e-182	2.04609e-178	405.262
PCDHB9	3.87026	0.691495	34.0705	2.10744e-179	6.39888e-176	399.453
CASQ1	4.30597	4.33673	33.7124	1.10247e-176	3.08998e-173	393.218
YWHAEP5	8.08879	-4.88662	32.709	4.67837e-169	1.21758e-165	375.724
SF3A1	2.00455	4.5573	32.5677	5.32391e-168	1.29321e-164	373.302
FOXG1-AS1	7.49535	2.60705	32.0852	2.48127e-164	5.65047e-161	364.888
RNF212	-4.895	0.274834	-31.9497	2.5469e-163	5.45876e-160	362.569
MEX3A	3.79866	-0.0422053	31.872	9.8517e-163	1.9942e-159	361.221
EEF1A1P7	5.41606	-7.53616	31.1571	2.50283e-157	4.79964e-154	348.824
MASP1	4.27073	3.06691	31.0696	1.13862e-156	2.07433e-153	347.315
MAML2	3.41097	1.80642	30.6893	8.40255e-154	1.45788e-150	340.737
HNRNPA1P4	7.12445	-5.37874	30.5834	5.42127e-153	8.97861e-150	338.879
UNCX	-5.86805	-12.2147	-29.9441	3.45499e-148	5.4733e-145	327.859
N4BP2	2.55793	-0.981665	29.8601	1.44651e-147	2.19605e-144	326.433
CKM	-7.35814	-2.49041	-29.7862	5.32124e-147	7.75539e-144	325.135
RP11-40C6.2	13.5153	-0.912202	29.7604	8.31968e-147	1.16591e-143	324.69
RP11-220C2.1	8.73163	-5.68239	29.6745	3.66237e-146	4.94229e-143	323.214
RP11-48F14.2	8.18183	-5.23571	29.2834	3.10942e-143	4.04624e-140	316.495
SATB2-AS1	7.41809	2.06025	29.1855	1.67898e-142	2.10949e-139	314.815
SOX4	3.92523	2.29272	29.1555	2.74025e-142	3.32812e-139	314.327
EEF1A1P16	5.44913	-7.48925	29.1343	3.999e-142	4.70025e-139	313.951
FOXG1	5.01796	6.123	29.0982	7.37893e-142	8.40184e-139	313.341
UBE2D3P2	7.18072	-6.31933	28.9784	5.91934e-141	6.53567e-138	311.266
EIF5AP4	9.35265	-3.05039	28.9765	6.11632e-141	6.55453e-138	311.234
BMP2	4.26241	0.965722	28.9172	1.65309e-140	1.72091e-137	310.243
FOXB1	-8.15584	-13.2851	-28.7937	1.41449e-139	1.43162e-136	308.105
EGFR	4.53198	3.71908	28.7693	2.09711e-139	2.06514e-136	307.712
SMAD1	3.12227	3.42155	28.6443	1.79371e-138	1.71989e-135	305.574
MYC	3.99161	2.03104	28.5762	5.76074e-138	5.38201e-135	304.412
GNG7	-2.40677	4.75506	-28.5598	7.64364e-138	6.96259e-135	304.13
FIGN	2.97994	0.917577	28.5123	1.72357e-137	1.53171e-134	303.32
CPXM1	4.56594	0.340403	28.1162	1.51832e-134	1.31718e-131	296.565
KIAA1549	2.90044	1.80935	28.1066	1.78979e-134	1.51658e-131	296.401
CNGA3	6.37996	-0.0431701	28.0645	3.7557e-134	3.11006e-131	295.663
RP4-791C19.1	5.76481	-6.57714	27.976	1.70298e-133	1.37888e-130	294.157
ANKRD34B	-7.19881	-5.57128	-27.8266	2.17723e-132	1.72455e-129	291.618
FAM95C	-5.86647	0.463403	-27.5638	1.91665e-130	1.48585e-127	287.158
RP11-496I9.1	-5.41475	-2.61756	-27.5537	2.26149e-130	1.71666e-127	286.993
RP11-122C5.3	9.1082	-4.83078	27.3115	1.39592e-128	1.038e-125	282.886
AC083864.3	8.34847	-5.73943	27.0695	8.44977e-127	6.15751e-124	278.798
MEG3	-4.06899	7.27099	-27.0343	1.50366e-126	1.07426e-123	278.224
PTPRZ1	2.49554	6.87778	27.0301	1.61538e-126	1.13189e-123	278.153
MYH2	-6.43391	-6.74316	-27.0045	2.54298e-126	1.74822e-123	277.701
CRISPLD1	3.60561	1.85303	26.7415	2.13114e-124	1.43797e-121	273.289
CYP4F35P	-6.45285	-0.0769479	-26.7143	3.43657e-124	2.27663e-121	272.813
MYL1	-7.26483	-5.10238	-26.5488	5.60737e-123	3.64839e-120	270.031
GLDC	2.89992	3.99116	26.4418	3.33973e-122	2.13485e-119	268.254
TMEM108	2.90483	3.73424	26.3858	8.57578e-122	5.38736e-119	267.314
HSP90AB2P	6.53917	-5.9101	26.3312	2.18777e-121	1.35108e-118	266.381
SBSN	-6.23906	-3.71455	-26.3245	2.45041e-121	1.48805e-118	266.268
KRT1	-7.52731	-3.50326	-26.2519	8.30643e-121	4.96153e-118	265.052
FRMPD3	3.04363	1.44694	26.1304	6.27772e-120	3.68927e-117	263.037
ADAP1	-2.71657	4.93837	-26.0375	2.98215e-119	1.72473e-116	261.485
CCDC144A	4.20723	-0.000326953	26.0072	4.95428e-119	2.82053e-116	260.979
RP11-394O4.5	-4.0174	-0.0113824	-25.9691	9.39172e-119	5.26457e-116	260.342
BMPR1APS2	9.42182	-3.74899	25.9177	2.2616e-118	1.24854e-115	259.467
TMEM91	-2.30129	2.78017	-25.8988	3.04615e-118	1.65656e-115	259.17
RPL10P3	6.60721	-6.39159	25.8686	5.14425e-118	2.75641e-115	258.648
ANKFN1	3.19436	-0.257474	25.8533	6.5314e-118	3.4095e-115	258.41
SLC6A3	-7.60667	-11.2801	-25.8542	6.55026e-118	3.4095e-115	258.407
ACTA1	-4.43933	-0.0384593	-25.7737	2.47707e-117	1.27119e-114	257.082
OTX2	-7.52518	-10.3244	-25.7082	7.51886e-117	3.80496e-114	255.976
FABP6	-4.96473	1.26918	-25.6487	2.01866e-116	1.00756e-113	254.992
OBSCN	-3.32383	1.00206	-25.6136	3.58872e-116	1.76701e-113	254.419
SLC14A2	6.76946	-2.75292	25.5592	9.04504e-116	4.3942e-113	253.498
RP11-134N1.2	7.98228	-4.51901	25.5319	1.42447e-115	6.82919e-113	253.046
LCMT2	2.22161	1.53698	25.4982	2.45949e-115	1.16382e-112	252.502
BEND3	2.08174	-1.1353	25.4929	2.68659e-115	1.25498e-112	252.414
ISL1	-5.23628	-10.2904	-25.4722	3.8519e-115	1.77655e-112	252.055
UHRF1	3.53553	0.409085	25.4566	4.9184e-115	2.24008e-112	251.812
MYO16	3.15689	1.42387	25.4413	6.34018e-115	2.85199e-112	251.559
RP11-392E22.9	-6.20383	-3.15936	-25.4312	7.63798e-115	3.39387e-112	251.373
VANGL2	2.67321	2.57184	25.3966	1.33557e-114	5.7871e-112	250.816
FXYD6	3.58625	9.23868	25.3965	1.33735e-114	5.7871e-112	250.815
MYCL	3.02754	0.0928951	25.3959	1.35005e-114	5.7871e-112	250.806
ABCA10	-3.63559	-1.08751	-25.3234	4.51542e-114	1.91307e-111	249.603
TENM4	2.91237	2.2147	25.2898	7.88892e-114	3.30392e-111	249.047
EEF1A1P19	3.64877	-1.32352	25.2604	1.28726e-113	5.32983e-111	248.559
RPP25	-3.07335	0.415308	-25.2448	1.66809e-113	6.82903e-111	248.301
LINC00202-1	-3.75092	0.849409	-25.2359	1.93307e-113	7.82593e-111	248.154
RP11-676M6.1	3.41674	1.2818	25.2221	2.43097e-113	9.73349e-111	247.926
NLGN1	2.65365	2.2159	25.2201	2.51328e-113	9.9537e-111	247.893
ADAMTS6	3.21282	-0.931589	25.2049	3.23344e-113	1.26681e-110	247.642
ACAP1	-3.16546	0.768189	-25.17	5.77432e-113	2.23823e-110	247.064
RP11-116O18.1	6.93672	-2.98589	25.1438	9.07042e-113	3.47884e-110	246.614
PCDHGC4	3.96731	2.72188	25.1255	1.20893e-112	4.58839e-110	246.328
EBF3	-4.92708	-5.7809	-25.098	1.92949e-112	7.24773e-110	245.862
DMBX1	-5.58675	-12.1226	-25.0789	2.6624e-112	9.89871e-110	245.542
FER1L4	-3.84265	-0.554728	-25.0562	3.81591e-112	1.40441e-109	245.183
SETBP1	2.38358	1.59712	25.0309	5.80602e-112	2.11548e-109	244.765
KRT2	-6.85602	-5.02919	-25.0255	6.44909e-112	2.32652e-109	244.66
ZDHHC15	2.08788	0.295417	24.9861	1.21936e-111	4.35576e-109	244.026
NUDT4P2	5.749	2.50458	24.9826	1.31153e-111	4.59489e-109	243.953
NUDT4P1	5.749	2.50458	24.9826	1.31153e-111	4.59489e-109	243.953
PRSS56	-6.22322	-4.57054	-24.945	2.44584e-111	8.4873e-109	243.333
CCDC80	3.20928	2.48107	24.9419	2.53499e-111	8.71368e-109	243.297
MARVELD3	4.70275	-1.34724	24.9418	2.56098e-111	8.72072e-109	243.287
ZXDA	2.15844	-0.415976	24.9132	4.07188e-111	1.37373e-108	242.825
TSPAN11	3.13499	2.35027	24.8967	5.35277e-111	1.7893e-108	242.552
RP11-744D14.1	5.85301	-7.0539	24.8524	1.13236e-110	3.75078e-108	241.806
ANGPTL2	3.47595	2.79927	24.8127	2.14853e-110	7.05261e-108	241.168
CTB-49A3.4	-7.01983	-11.1265	-24.811	2.2429e-110	7.29665e-108	241.125
EXPH5	3.19933	-0.824563	24.7889	3.1802e-110	1.02543e-107	240.777
GPR75	3.21362	2.32755	24.7825	3.5334e-110	1.12933e-107	240.672
SLC15A2	3.61169	4.0737	24.6814	1.87595e-109	5.94367e-107	239.009
CALCRL	3.48912	2.16429	24.6583	2.74588e-109	8.62489e-107	238.63
NXF2B	-5.91821	-6.37179	-24.6559	2.90375e-109	9.04283e-107	238.574
WARS2-IT1	6.31044	-5.13514	24.6246	4.86476e-109	1.50214e-106	238.06
SPARC	4.44851	8.72217	24.5887	8.70308e-109	2.66475e-106	237.481
SATB2	2.6918	3.27991	24.5869	8.91275e-109	2.70621e-106	237.457
DNAJA4	-2.85017	4.35266	-24.5196	2.69925e-108	8.12809e-106	236.353
TMSB4XP4	-3.05146	-0.687718	-24.4621	6.94866e-108	2.07526e-105	235.411
ANKRD19P	-3.72358	2.25735	-24.4466	8.96858e-108	2.65674e-105	235.157
ALDH1A3	-5.0162	-0.747518	-24.4423	9.76533e-108	2.86943e-105	235.072
ASPHD1	-2.55864	4.83466	-24.4242	1.29633e-107	3.77863e-105	234.79
CASK	2.33805	3.10172	24.4165	1.47059e-107	4.25257e-105	234.665
PCDHB19P	4.40411	-2.74649	24.3755	2.90057e-107	8.32167e-105	233.988
SYNDIG1L	-4.80719	-0.635894	-24.296	1.07773e-106	3.06782e-104	232.681
GSC	6.48501	-6.1366	24.2857	1.27998e-106	3.61529e-104	232.509
IGSF3	3.53922	1.76928	24.2606	1.9028e-106	5.32939e-104	232.114
SOX6	2.85997	2.30617	24.2602	1.9161e-106	5.32939e-104	232.107
CRABP1	-6.11647	0.319694	-24.2531	2.18276e-106	6.02509e-104	231.978
CTD-3064M3.7	-5.01376	-4.30405	-24.2475	2.39338e-106	6.55677e-104	231.886
BMP4	3.03701	0.97077	24.2335	2.9691e-106	8.07329e-104	231.671
ADCYAP1R1	3.56244	6.20107	24.1673	8.78369e-106	2.37069e-103	230.591
HCN2	-2.35336	4.22274	-24.1515	1.13806e-105	3.02674e-103	230.333
ALX3	6.91822	-1.45844	24.1404	1.38352e-105	3.65289e-103	230.138
RP11-358N4.6	6.82649	-6.76983	24.1289	1.67162e-105	4.38181e-103	229.95
RP11-61N20.3	3.62288	2.38577	24.1001	2.63719e-105	6.86348e-103	229.496
ZNF100	2.21322	0.323311	24.0755	3.94277e-105	1.01886e-102	229.095
YBX1P6	4.98607	-7.7184	24.0569	5.42275e-105	1.39143e-102	228.777
SFRP2	6.07204	3.57698	24.0506	6.0147e-105	1.53253e-102	228.674
NAP1L1P3	5.50501	-6.45756	24.0283	8.65208e-105	2.18922e-102	228.312
TAGAP	3.46289	-0.692081	23.9841	1.75708e-104	4.41525e-102	227.606
FXYD6-FXYD2	7.92945	-3.65157	23.9813	1.86594e-104	4.65667e-102	227.547
AC006946.16	-4.24456	-2.79416	-23.9608	2.57922e-104	6.39295e-102	227.224
STON1	3.00109	0.0538607	23.9174	5.22001e-104	1.28511e-101	226.522
SYNE4	-2.87996	-2.62399	-23.8906	8.08538e-104	1.97718e-101	226.086
KDM4D	2.11336	-0.852036	23.8604	1.323e-103	3.21365e-101	225.595
RN7SL471P	-9.24893	-2.3598	-23.7563	7.31565e-103	1.75364e-100	223.892
LINC00261	-5.54238	-11.8464	-23.7463	8.61121e-103	2.05071e-100	223.73
ZNF486	2.04925	-0.748674	23.7322	1.06817e-102	2.52726e-100	223.515
DCX	3.69389	1.47312	23.7315	1.07959e-102	2.53781e-100	223.504
TTC30A	2.12265	0.488401	23.7264	1.17361e-102	2.74113e-100	223.421
MAFB	3.01557	2.79712	23.7219	1.26369e-102	2.93274e-100	223.348
POLR1B	2.02639	1.75398	23.705	1.66317e-102	3.83539e-100	223.074
GLUD2	2.57513	0.48998	23.686	2.26432e-102	5.18886e-100	222.767
TNNC1	-3.98422	-1.11062	-23.6598	3.46614e-102	7.89327e-100	222.343
HNRNPA1P12	5.43947	-6.7039	23.6549	3.80816e-102	8.61827e-100	222.249
AC105053.3	6.19967	-4.87989	23.6063	8.37479e-102	1.8836e-99	221.464
GLDCP1	5.35927	-4.83769	23.5449	2.27162e-101	5.07784e-99	220.47
RAVER1	2.41516	3.04452	23.501	4.56597e-101	1.01443e-98	219.774
YJEFN3	-3.7848	4.46761	-23.4527	9.98182e-101	2.20423e-98	218.995
PTENP1	2.39345	0.266727	23.4522	1.00659e-100	2.20941e-98	218.987
RP11-289I10.2	3.38373	1.34104	23.4311	1.41644e-100	3.09038e-98	218.647
YWHAZP6	5.91017	-6.31811	23.4036	2.24143e-100	4.86123e-98	218.19
KCND1	2.54567	1.15785	23.3885	2.82365e-100	6.08773e-98	217.96
MAGED4	3.72721	3.86949	23.3498	5.2824e-100	1.13217e-97	217.336
PCP4	-4.67078	4.33762	-23.3188	8.81594e-100	1.87846e-97	216.826
RP11-451G4.2	-6.88552	-7.11012	-23.2958	1.28232e-99	2.71643e-97	216.453
CTD-2008L17.1	7.88931	-5.25172	23.2491	2.72304e-99	5.73507e-97	215.702
ANKRD20A19P	-7.30342	-5.20854	-23.2011	5.91291e-99	1.23818e-96	214.93
RP11-10G12.1	7.59978	-5.49688	23.1911	6.94909e-99	1.44684e-96	214.769
TNNI1	-7.30864	-5.61032	-23.1681	1.0063e-98	2.0715e-96	214.4
TMEM86A	2.06369	0.986279	23.1491	1.3497e-98	2.76279e-96	214.108
ZNF805	2.45141	-1.13661	23.1238	2.02985e-98	4.13181e-96	213.702
ABI3BP	3.70467	2.05501	23.1054	2.73283e-98	5.53185e-96	213.405
TAAR3	7.18015	-4.90784	23.0716	4.7628e-98	9.58769e-96	212.852
ARHGAP31	2.50702	2.40432	23.0391	7.93838e-98	1.58925e-95	212.343
ETV1	3.3381	4.39684	23.0218	1.04873e-97	2.08807e-95	212.066
MESTIT1	2.85027	-0.573987	22.9877	1.81434e-97	3.59278e-95	211.52
CTA-228A9.3	-3.13885	0.234783	-22.9781	2.11937e-97	4.17413e-95	211.365
IRX6	-6.33779	-8.83233	-22.9713	2.39009e-97	4.68201e-95	211.245
TESC	-2.38379	3.33947	-22.9689	2.45424e-97	4.78197e-95	211.219
ZNF699	2.59133	-1.01198	22.9659	2.5749e-97	4.99038e-95	211.171
WDR3	2.21764	1.33555	22.917	5.65078e-97	1.08364e-94	210.388
SOX14	-3.30859	-11.5874	-22.897	7.79763e-97	1.48751e-94	210.068
ANKRD18EP	2.86629	-0.432099	22.8744	1.11995e-96	2.12533e-94	209.707
CTC-351M12.1	2.05432	0.171191	22.8714	1.17617e-96	2.22047e-94	209.658
RGMB	2.71373	3.87662	22.8336	2.15559e-96	4.0485e-94	209.055
TCF12	2.97492	4.43982	22.8166	2.82817e-96	5.28448e-94	208.784
CD207	5.42117	-6.62353	22.809	3.23761e-96	6.01865e-94	208.65
RNF180	2.17266	1.62496	22.7855	4.66064e-96	8.62005e-94	208.287
LRIG1	3.15685	5.95699	22.7719	5.79446e-96	1.06094e-93	208.07
WDR49	3.8174	0.237914	22.7645	6.52638e-96	1.18898e-93	207.951
TTR	-8.91525	-2.91467	-22.7626	6.8004e-96	1.23273e-93	207.911
DDR1	2.85381	6.55499	22.7089	1.58711e-95	2.84867e-93	207.066
KPRP	-5.20008	-7.96661	-22.686	2.31731e-95	4.1389e-93	206.689
DPYSL3	2.73268	5.89951	22.6789	2.56501e-95	4.55897e-93	206.588
RP1-232L22__B.1	5.83955	-4.6755	22.6684	3.0733e-95	5.43586e-93	206.408
TIMP4	3.36764	2.76855	22.6638	3.26925e-95	5.75451e-93	206.347
VCAN	3.01472	4.24552	22.6546	3.78715e-95	6.63407e-93	206.2
HNF4G	3.37905	-1.8561	22.6345	5.21889e-95	9.09834e-93	205.881
ZDHHC11B	-2.32144	3.11228	-22.6198	6.60154e-95	1.1454e-92	205.647
RP5-844F9.1	2.6897	-0.970342	22.5961	9.63508e-95	1.66381e-92	205.27
HIRAP1	6.51272	-6.89569	22.5276	2.90753e-94	4.99711e-92	204.17
ADGRG1	3.0037	6.98175	22.5177	3.36573e-94	5.75746e-92	204.024
TPTE2P3	5.22915	-7.39448	22.4788	6.32777e-94	1.07738e-91	203.396
GNRH1	-3.01838	-0.930821	-22.4747	6.67563e-94	1.13132e-91	203.342
HES6	3.31263	5.73489	22.4678	7.45124e-94	1.25691e-91	203.233
RP11-393I2.4	2.24721	-1.85192	22.4601	8.42481e-94	1.41459e-91	203.11
TNC	4.17681	1.46576	22.4581	8.75739e-94	1.46369e-91	203.072
RP11-966I7.2	5.87861	0.18647	22.4017	2.16056e-93	3.59461e-91	202.173
BMPR1APS1	6.14212	-5.86548	22.3705	3.54911e-93	5.87798e-91	201.678
TCEA1P2	3.93123	0.517726	22.342	5.52919e-93	9.1159e-91	201.237
RP4-718N17.2	7.80001	-4.61003	22.3193	8.0088e-93	1.31445e-90	200.868
TSPAN19	-5.82012	-2.89367	-22.3187	8.08844e-93	1.32157e-90	200.858
GCH1	-2.65051	-0.444143	-22.2637	1.91435e-92	3.10005e-90	200
HAPLN1	4.50859	1.73744	22.2612	2.01273e-92	3.24495e-90	199.95
RP11-1029M24.1	5.03292	-7.79667	22.2531	2.28816e-92	3.67275e-90	199.822
BCAN	3.45349	7.71441	22.2446	2.59252e-92	4.14302e-90	199.698
TPO	-6.22937	-4.89865	-22.2424	2.71464e-92	4.31924e-90	199.652
RP11-347E10.1	6.64054	-6.90213	22.1962	5.64186e-92	8.93768e-90	198.923
CDCA4P4	7.18003	-2.90186	22.1906	6.16691e-92	9.72716e-90	198.835
SAG	-7.67206	-7.79334	-22.164	9.39691e-92	1.4758e-89	198.415
RP11-64K12.4	8.72948	-3.43421	22.1508	1.158e-91	1.81086e-89	198.207
PRKRIRP7	5.09605	-5.30891	22.1401	1.37202e-91	2.13637e-89	198.038
PRAME	-6.79128	-8.73758	-22.1374	1.43257e-91	2.20241e-89	197.995
PCDHB8	3.40604	-1.01136	22.0664	4.35479e-91	6.63897e-89	196.888
GRHL3	4.96556	-2.54381	22.0623	4.69817e-91	7.1326e-89	196.812
SELL	4.54696	1.32482	22.0459	6.09218e-91	9.21057e-89	196.554
EEF1A1P9	4.9962	-3.67288	22.0395	6.73565e-91	1.01413e-88	196.454
CTA-929C8.8	-7.61444	-3.1716	-22.0173	9.56202e-91	1.42788e-88	196.105
THSD7A	2.41373	0.815332	21.9925	1.40023e-90	2.0824e-88	195.725
BCHE	2.6859	3.29446	21.9608	2.31019e-90	3.42171e-88	195.226
PCDHB10	2.34079	1.82915	21.9458	2.92728e-90	4.31816e-88	194.99
CHCHD3P3	6.19165	-4.82732	21.9303	3.77942e-90	5.5527e-88	194.736
RP11-334L9.1	4.15993	-7.59179	21.9024	5.84113e-90	8.54729e-88	194.302
ARHGEF16	-2.65468	-1.53207	-21.8997	6.05415e-90	8.82356e-88	194.267
RP11-638F5.2	7.2323	-5.49277	21.8905	7.06771e-90	1.0219e-87	194.112
SIX3	-5.98029	-4.16414	-21.8767	8.78702e-90	1.26547e-87	193.896
SULT1C4	2.57866	3.22586	21.8732	9.18714e-90	1.31788e-87	193.851
SLC39A14	2.91372	3.52309	21.8452	1.42847e-89	2.04109e-87	193.412
COL9A3	-3.8842	2.85935	-21.8426	1.49266e-89	2.12447e-87	193.368
TNFRSF19	2.65262	0.335535	21.8197	2.13338e-89	3.02459e-87	193.012
LRRN3	2.55415	3.80392	21.7942	3.18579e-89	4.48175e-87	192.613
TEAD1	2.31609	2.775	21.7901	3.40097e-89	4.76607e-87	192.548
DLG5	2.28243	3.64591	21.7804	3.95631e-89	5.52307e-87	192.397
TH	-5.88931	-3.82175	-21.7445	7.02902e-89	9.77517e-87	191.825
E2F5	2.03351	2.01852	21.7335	8.26944e-89	1.14565e-86	191.663
TFAP2A	3.57162	-1.02411	21.7215	9.98818e-89	1.37852e-86	191.475
OSGIN2	2.31086	3.14262	21.688	1.6903e-88	2.32407e-86	190.951
CFC1	-5.81897	-1.68322	-21.664	2.48789e-88	3.40784e-86	190.566
TMEM191C	-2.58694	1.30699	-21.6507	3.03429e-88	4.14072e-86	190.368
AC004603.4	-5.84194	-3.75641	-21.6464	3.27668e-88	4.45482e-86	190.292
ARHGEF33	-2.48863	0.110256	-21.6436	3.39074e-88	4.59275e-86	190.258
RP4-751H13.7	2.19535	-1.25214	21.6357	3.83691e-88	5.17784e-86	190.135
CH17-140K24.6	7.63678	-0.568563	21.6143	5.41837e-88	7.23164e-86	189.791
RIMKLBP1	5.71432	-4.11225	21.586	8.44134e-88	1.12251e-85	189.349
SEPT1	-2.38135	0.328493	-21.5746	9.99611e-88	1.32443e-85	189.181
HHIP-AS1	-2.70313	-0.45781	-21.5574	1.30757e-87	1.71996e-85	188.914
NUDT4	2.4432	5.72061	21.5566	1.32549e-87	1.73725e-85	188.9
HRH1	2.60184	2.41911	21.4823	4.23584e-87	5.49242e-85	187.743
SUCLA2P1	5.74352	-6.15487	21.4659	5.52359e-87	7.13679e-85	187.479
RP11-932O9.9	-2.97344	0.793593	-21.4623	5.78916e-87	7.45349e-85	187.432
RPS3AP44	5.48239	-7.00736	21.4585	6.20029e-87	7.92692e-85	187.364
ABCC4	2.23804	0.201078	21.4579	6.20038e-87	7.92692e-85	187.364
SGMS2	-3.19717	-0.955208	-21.4521	6.78537e-87	8.64447e-85	187.274
TLX1	6.90255	-6.47125	21.4498	7.10129e-87	9.01543e-85	187.228
RESP18	-6.94288	-2.06061	-21.4417	8.06009e-87	1.01971e-84	187.102
MMP16	2.464	1.53654	21.4247	1.04109e-86	1.31257e-84	186.847
KLF12	2.05479	1.71399	21.4169	1.17591e-86	1.47743e-84	186.726
CES4A	-3.38885	3.79672	-21.4145	1.2202e-86	1.52781e-84	186.689
ADAMTS5	3.14399	-2.38549	21.4066	1.38125e-86	1.72353e-84	186.566
CALML5	-6.83466	-5.98475	-21.3973	1.61181e-86	2.00436e-84	186.412
DLL3	3.8431	3.32589	21.3772	2.18912e-86	2.71302e-84	186.107
FADS2	2.85414	7.1319	21.3686	2.49867e-86	3.08616e-84	185.976
RP11-316N24.2	-5.88384	-4.10103	-21.3662	2.61807e-86	3.2227e-84	185.929
MED13L	2.05645	2.97654	21.3257	4.87294e-86	5.97813e-84	185.31
HNMT	2.35108	3.58908	21.2833	9.43411e-86	1.15349e-83	184.653
SLC2A3P1	8.50514	-6.21121	21.2833	9.52434e-86	1.16063e-83	184.643
ZBTB7C	2.15929	1.5369	21.2765	1.04743e-85	1.27214e-83	184.548
FAM169A	2.51697	2.37025	21.2281	2.2259e-85	2.69444e-83	183.798
PXYLP1	2.16193	3.33951	21.2231	2.40388e-85	2.90025e-83	183.721
ZNF681	2.20563	-0.233186	21.2005	3.41426e-85	4.09217e-83	183.372
KRT15	-6.14115	-4.59457	-21.1883	4.1661e-85	4.97691e-83	183.174
C14orf37	2.18312	1.21581	21.187	4.21362e-85	5.01724e-83	183.162
TMEM191A	-3.67686	1.91411	-21.1653	5.91039e-85	7.01469e-83	182.825
RP11-2E11.5	2.92398	-0.544682	21.1323	9.85048e-85	1.1653e-82	182.317
CHAD	-3.81987	0.352125	-21.1158	1.27494e-84	1.50336e-82	182.06
AC005255.3	9.3455	-2.99868	21.1134	1.33202e-84	1.56443e-82	182.016
RPLP0P6	2.51493	1.76833	21.1126	1.33532e-84	1.56443e-82	182.014
RP11-27I1.4	3.64584	-0.572066	21.0906	1.88024e-84	2.19578e-82	181.673
RP11-66B24.7	-4.08171	-4.29518	-21.0896	1.91955e-84	2.23453e-82	181.652
KRT14	-7.15849	-3.57618	-21.0793	2.25815e-84	2.60374e-82	181.49
TNR	3.42245	5.15052	21.0666	2.72463e-84	3.13169e-82	181.303
RP11-844P9.2	4.09162	-0.216347	21.0468	3.7257e-84	4.25548e-82	180.992
BEST3	3.30285	1.20186	21.0044	7.13825e-84	8.10247e-82	180.344
RP11-181C21.4	4.37609	-0.551774	20.9919	8.73702e-84	9.88641e-82	180.143
MLIP	4.13534	2.97538	20.9734	1.16056e-83	1.30112e-81	179.86
KLHL11	2.7171	0.0227997	20.9712	1.19299e-83	1.33337e-81	179.833
GUCA1A	-5.51843	-1.99067	-20.9571	1.4957e-83	1.6615e-81	179.608
RP11-567I13.1	7.50821	-4.23967	20.9557	1.53005e-83	1.6945e-81	179.585
SLC5A8	-4.42541	-7.1114	-20.9403	1.94031e-83	2.14234e-81	179.349
AC092675.3	6.97832	-3.47986	20.9369	2.04506e-83	2.25117e-81	179.296
LRRC55	3.45823	0.71657	20.9327	2.16104e-83	2.37168e-81	179.241
FAM110B	2.58529	4.07713	20.9211	2.58619e-83	2.82974e-81	179.062
ACKR3	2.68943	3.50707	20.9093	3.10323e-83	3.3752e-81	178.881
YWHAZP4	5.67432	-2.04868	20.901	3.56094e-83	3.8615e-81	178.744
RP11-44N22.3	-3.53758	-0.187263	-20.8998	3.59136e-83	3.88293e-81	178.735
TSEN15P1	5.07227	-7.91955	20.898	3.72892e-83	4.01973e-81	178.698
TSPAN6	2.29607	3.38206	20.8534	7.3519e-83	7.87864e-81	178.022
ATXN8OS	-5.87483	-6.85192	-20.8382	9.37085e-83	1.00128e-80	177.78
ST7-AS2	6.77812	-4.3835	20.8344	9.93909e-83	1.05889e-80	177.722
NXF2	-5.53345	-8.35942	-20.8083	1.48568e-82	1.57361e-80	177.322
GOLIM4	2.51507	5.01902	20.7947	1.81456e-82	1.91085e-80	177.122
GRIA4	2.89794	4.8067	20.7939	1.83607e-82	1.92793e-80	177.111
RP5-1120P11.1	-3.72331	-1.96604	-20.7894	1.97446e-82	2.06728e-80	177.038
CTB-25B13.5	2.49727	0.0325117	20.7753	2.44437e-82	2.55195e-80	176.826
SNX18P3	-4.94839	-4.04255	-20.7639	2.94088e-82	3.05506e-80	176.642
ATF7IP2	-2.44217	1.6391	-20.7633	2.94304e-82	3.05506e-80	176.641
CTC-512J14.5	5.57602	-3.65325	20.7607	3.09057e-82	3.19909e-80	176.592
RP11-550F7.1	5.42173	-4.4307	20.7565	3.29658e-82	3.40266e-80	176.528
RP11-173P15.5	9.91044	-3.80734	20.7552	3.36416e-82	3.46262e-80	176.508
NFIB	2.23692	3.82402	20.7532	3.43419e-82	3.52474e-80	176.487
MYBPC3	-4.342	-5.53918	-20.7431	4.04695e-82	4.14199e-80	176.324
AC007106.1	-6.23694	-11.2446	-20.7298	4.96928e-82	5.05756e-80	176.119
CCDC85B	-3.02041	5.07395	-20.7033	7.39716e-82	7.48675e-80	175.723
PEG10	-2.39807	4.8874	-20.6739	1.16274e-81	1.17356e-79	175.273
TMEM97	2.22411	2.8537	20.672	1.19617e-81	1.20397e-79	175.245
AC012066.1	-5.93314	-4.97664	-20.6703	1.23883e-81	1.24347e-79	175.21
RP11-893F2.14	-5.86214	-3.86803	-20.661	1.42927e-81	1.42676e-79	175.067
RP4-785G19.5	6.87347	-4.67015	20.6607	1.43673e-81	1.4303e-79	175.062
SERTAD4-AS1	-3.07626	-0.227481	-20.6591	1.45965e-81	1.44915e-79	175.046
JAKMIP2-AS1	5.6389	-5.27563	20.6439	1.85828e-81	1.8399e-79	174.806
RP11-815I9.4	2.03402	-1.20405	20.6382	2.00971e-81	1.98444e-79	174.728
RP11-609N14.4	-3.80821	-5.6418	-20.6146	2.89884e-81	2.84695e-79	174.363
C6orf132	-4.58042	-7.71327	-20.6018	3.54518e-81	3.47237e-79	174.163
KLHL25	2.33853	2.60939	20.5628	6.38297e-81	6.23162e-79	173.577
C1orf226	2.2569	0.933221	20.5627	6.3965e-81	6.23162e-79	173.575
RP4-673D20.3	2.97458	0.98808	20.5615	6.51096e-81	6.32622e-79	173.557
BCAS1	-3.98103	4.47853	-20.5581	6.89965e-81	6.68606e-79	173.5
CTB-79E8.3	-8.90258	-1.03357	-20.5495	7.89303e-81	7.6284e-79	173.366
NFIX	2.47126	6.42536	20.546	8.25121e-81	7.95347e-79	173.322
PAPD7	4.20679	-2.4257	20.5154	1.32931e-80	1.27796e-78	172.847
OTOGL	2.84267	0.674599	20.5104	1.42371e-80	1.36511e-78	172.778
EEF1A1P4	4.81205	-6.04197	20.5077	1.49544e-80	1.43013e-78	172.729
SHD	3.85002	3.76213	20.5016	1.63642e-80	1.56086e-78	172.64
MB21D2	2.12392	1.60655	20.4791	2.29779e-80	2.18596e-78	172.302
ITPR2	2.29436	2.28463	20.4786	2.3147e-80	2.19631e-78	172.294
RP11-268J15.5	-2.33971	1.82373	-20.4727	2.53293e-80	2.39093e-78	172.205
RP11-229P13.23	9.07445	-3.5687	20.4594	3.13009e-80	2.94697e-78	171.994
MSTN	3.62541	-0.36411	20.4499	3.59596e-80	3.37686e-78	171.856
EEF1A1P12	4.62914	-3.91884	20.4489	3.67467e-80	3.44191e-78	171.834
RP11-875O11.1	2.86316	-0.567683	20.4414	4.0868e-80	3.81812e-78	171.728
RP1-152L7.5	2.19806	0.840906	20.4275	5.05223e-80	4.708e-78	171.517
PRELID1P1	6.09727	-4.03729	20.4164	6.02993e-80	5.57631e-78	171.341
HNRNPKP1	4.65922	-4.18382	20.406	7.06957e-80	6.50472e-78	171.183
RP11-175B9.3	-6.21229	-0.52784	-20.4028	7.42629e-80	6.81572e-78	171.134
PSMC1P1	2.12281	3.09389	20.4007	7.60125e-80	6.95877e-78	171.111
ZNF221	2.33274	-0.763059	20.3708	1.19856e-79	1.08904e-77	170.657
RP11-424C20.2	5.76219	-3.26867	20.3535	1.57509e-79	1.42761e-77	170.385
DTNB	-2.39106	3.86726	-20.3514	1.61236e-79	1.45776e-77	170.362
ZBED6	3.57817	-0.297093	20.3496	1.66052e-79	1.49759e-77	170.332
PRKCDBP	-2.67523	0.486009	-20.3385	1.96235e-79	1.76109e-77	170.166
NMB	3.45714	3.07156	20.3257	2.38413e-79	2.12391e-77	169.972
CMKLR1	2.57412	-0.403729	20.2878	4.24804e-79	3.76598e-77	169.397
RP11-9L18.2	3.43988	-3.4498	20.2859	4.36808e-79	3.86299e-77	169.369
ZSCAN23	3.7784	-0.622131	20.2833	4.5667e-79	4.02887e-77	169.325
MYH1	-5.32868	-6.18132	-20.2826	4.62989e-79	4.07475e-77	169.312
SCRT2	5.12533	0.136354	20.267	5.87287e-79	5.15624e-77	169.075
PMCH	-7.75722	-9.95227	-20.2617	6.36219e-79	5.57242e-77	168.995
PHKG1	2.85575	3.51921	20.2566	6.81978e-79	5.94463e-77	168.926
AC113188.2	-3.93236	2.65693	-20.2417	8.61156e-79	7.48856e-77	168.694
PPIAP11	6.35239	-5.20893	20.229	1.04574e-78	9.07201e-77	168.5
CRISP2	-5.23989	-9.74464	-20.2282	1.05971e-78	9.17144e-77	168.487
CCDC26	5.42099	-6.78731	20.2277	1.06641e-78	9.20753e-77	168.481
KLHL1	-5.4188	-3.64435	-20.2183	1.23104e-78	1.06038e-76	168.338
FAM3C2	3.29423	3.27222	20.2085	1.41562e-78	1.2165e-76	168.199
ENOX1-AS1	-4.35907	-7.73311	-20.2001	1.62305e-78	1.39147e-76	168.063
EPCAM	-2.94633	-0.832383	-20.1889	1.90863e-78	1.62863e-76	167.901
RP11-284F21.10	2.23503	-0.614869	20.1873	1.95575e-78	1.66495e-76	167.877
OTX2-AS1	-4.54341	-11.4934	-20.1702	2.55469e-78	2.16976e-76	167.611
NPB	-3.80471	-1.85611	-20.1544	3.23391e-78	2.74025e-76	167.376
PDLIM5	2.41769	4.26148	20.1439	3.77343e-78	3.18261e-76	167.223
SMG7-AS1	2.41075	-1.76749	20.1404	3.97863e-78	3.34022e-76	167.17
LINC00519	6.44535	-4.37634	20.1061	6.75182e-78	5.65538e-76	166.643
KITLG	2.45488	2.7943	20.1034	6.97637e-78	5.83007e-76	166.611
FAM105A	2.05878	0.913691	20.0882	8.77374e-78	7.282e-76	166.382
PIK3C2G	5.70092	-4.09675	20.0824	9.66083e-78	8.00004e-76	166.287
KB-67B5.12	5.95362	-7.46916	20.0723	1.12464e-77	9.29196e-76	166.135
RP11-2K6.1	-8.57763	-2.46269	-20.0584	1.3888e-77	1.14485e-75	165.925
FTCD	-3.68109	1.23781	-20.0469	1.64447e-77	1.34951e-75	165.757
SPATA3-AS1	3.89612	-3.78191	20.0428	1.75535e-77	1.43726e-75	165.692
RNA5SP216	-12.6474	-1.78157	-20.0415	1.79388e-77	1.46551e-75	165.67
C21orf62	4.71918	-1.3102	20.0376	1.90097e-77	1.54952e-75	165.613
SH3BP1	2.03942	2.4258	20.0299	2.11896e-77	1.71952e-75	165.505
RP11-219E7.2	5.8813	-6.88364	20.0062	3.05908e-77	2.47141e-75	165.139
TCAF1P1	3.76648	0.278908	19.9933	3.70191e-77	2.97755e-75	164.949
FOXO3B	2.82757	-1.6721	19.9732	4.99048e-77	4.00514e-75	164.652
RP11-96H17.3	-6.94343	-5.27606	-19.9716	5.15717e-77	4.12981e-75	164.619
DLK1	-6.70349	-7.0226	-19.97	5.28284e-77	4.22094e-75	164.595
NXPH1	3.17997	4.33503	19.9693	5.29413e-77	4.22094e-75	164.593
RP11-21L23.2	3.1675	-2.68114	19.961	6.00184e-77	4.77474e-75	164.468
PRR26	-3.20098	-3.60878	-19.9557	6.50298e-77	5.15093e-75	164.388
COL28A1	3.30735	1.35608	19.9485	7.24146e-77	5.72343e-75	164.281
SLC4A4	2.50791	4.4651	19.9358	8.77467e-77	6.92021e-75	164.09
Z83001.1	6.13581	-0.0808317	19.9016	1.4803e-76	1.16493e-74	163.569
TOX	2.52803	3.39796	19.878	2.0977e-76	1.64369e-74	163.222
MARCKS	2.34745	5.95572	19.8737	2.23754e-76	1.74576e-74	163.158
HSPA8P1	4.66715	-5.7119	19.8664	2.51794e-76	1.96033e-74	163.04
RP11-286H15.1	-4.381	-1.63847	-19.8661	2.5293e-76	1.96498e-74	163.036
TMC2	-2.95517	-2.79493	-19.8617	2.67979e-76	2.07747e-74	162.978
RP11-426C22.4	-5.19679	-6.98053	-19.8493	3.25314e-76	2.51126e-74	162.785
ABCC6P1	2.86602	-0.434107	19.8385	3.80202e-76	2.92876e-74	162.63
BMPER	3.01032	2.38232	19.8208	4.95607e-76	3.80167e-74	162.366
RTP1	4.75492	0.58617	19.8123	5.67564e-76	4.34449e-74	162.231
TXNDC2	4.58685	-3.51184	19.7965	7.20339e-76	5.50236e-74	161.994
LINC00994	5.272	-6.4787	19.7942	7.45526e-76	5.68284e-74	161.96
LDHAP3	5.3358	-6.95551	19.7864	8.38228e-76	6.37613e-74	161.843
H3F3AP4	2.63126	6.22329	19.7731	1.01571e-75	7.7101e-74	161.652
SMAD9	2.1698	2.30888	19.7675	1.1053e-75	8.37271e-74	161.567
FAM196B	3.62192	-0.394661	19.7656	1.14061e-75	8.62226e-74	161.536
SLC16A8	-3.01443	-0.598748	-19.7622	1.1967e-75	9.02754e-74	161.488
CTC-304I17.1	-4.31149	-2.95352	-19.7587	1.26971e-75	9.5585e-74	161.429
RARA	2.02435	3.36738	19.7559	1.31503e-75	9.87928e-74	161.394
GPC6	2.20175	-0.42064	19.7535	1.36365e-75	1.02025e-73	161.358
PCDHB16	2.58018	0.0103317	19.7525	1.3841e-75	1.03342e-73	161.344
TNNT3	-5.41688	-2.79147	-19.7471	1.51283e-75	1.12723e-73	161.255
NR2F1	2.37413	5.97832	19.7401	1.66585e-75	1.23871e-73	161.159
ABCA5	-2.59522	2.0858	-19.7321	1.87904e-75	1.39439e-73	161.039
EEF1A1P13	2.16131	-0.737677	19.7269	2.03124e-75	1.50428e-73	160.962
RP11-277P12.9	5.87579	-7.10058	19.7242	2.13124e-75	1.57513e-73	160.914
RP11-430L16.1	5.65629	-7.84844	19.7223	2.19379e-75	1.61808e-73	160.885
KCNN2	2.44565	3.09306	19.7206	2.23283e-75	1.64354e-73	160.867
RP11-627D16.1	5.70972	-7.3037	19.7208	2.24146e-75	1.64657e-73	160.864
STK17B	2.47777	1.60624	19.7144	2.4488e-75	1.79526e-73	160.776
ZMIZ1	2.07278	4.85694	19.7012	2.98883e-75	2.18677e-73	160.577
RHBDL2	-2.55845	-0.579909	-19.6836	3.88985e-75	2.84029e-73	160.315
KRTDAP	-6.24383	-3.40125	-19.6717	4.68128e-75	3.391e-73	160.13
LINC01415	2.58936	-0.942236	19.6705	4.73047e-75	3.41983e-73	160.12
CDKN2B	2.88704	0.885099	19.6662	5.04731e-75	3.64166e-73	160.055
CACNG6	3.90826	-0.579379	19.6634	5.29405e-75	3.80462e-73	160.008
TLR3	2.56261	-1.00733	19.6614	5.41802e-75	3.88422e-73	159.985
DCD	-6.41206	-6.7329	-19.6618	5.42614e-75	3.88422e-73	159.983
LRRC8A	2.48996	6.06973	19.6458	6.84819e-75	4.89256e-73	159.752
POMC	-3.102	-0.598394	-19.6385	7.63997e-75	5.43692e-73	159.643
SCG3	3.0071	7.08691	19.6349	8.06414e-75	5.72758e-73	159.589
CCND2	2.33261	4.62954	19.6312	8.52316e-75	6.04182e-73	159.534
FLG2	-4.64212	-7.59245	-19.6133	1.12149e-74	7.92983e-73	159.261
ASXL3	2.25532	0.603816	19.6127	1.12301e-74	7.92983e-73	159.259
ANTXR1	2.23346	3.78881	19.6115	1.14405e-74	8.06276e-73	159.241
VDAC1P2	5.31381	-5.39649	19.6068	1.23641e-74	8.69691e-73	159.164
ANKRD18A	-4.41872	-2.38757	-19.5761	1.95696e-74	1.37387e-72	158.706
SLC5A7	-4.64795	-8.51282	-19.5661	2.27065e-74	1.59103e-72	158.558
BRINP3	2.76273	3.91163	19.5533	2.72895e-74	1.90848e-72	158.375
DCLK2	2.25531	5.57982	19.553	2.74368e-74	1.91511e-72	158.37
SOX2	2.57446	5.99014	19.5434	3.16579e-74	2.20007e-72	158.227
ARHGAP42	2.1301	0.703016	19.5433	3.17005e-74	2.20007e-72	158.226
TTC3P1	2.43554	1.11474	19.539	3.37946e-74	2.34095e-72	158.162
PLA2G4E	-4.15486	-7.51178	-19.5267	4.08739e-74	2.82596e-72	157.973
SLC8A1-AS1	6.72411	-2.52271	19.5137	4.96781e-74	3.42168e-72	157.779
TNNC2	-2.45263	1.04516	-19.5108	5.14828e-74	3.5393e-72	157.743
ID2	2.42369	7.08228	19.5081	5.35796e-74	3.67651e-72	157.704
LINGO3	-3.26854	-0.135233	-19.508	5.36926e-74	3.67733e-72	157.702
SEZ6L	3.11835	5.15952	19.504	5.69341e-74	3.88474e-72	157.643
RAB26	-2.87331	4.12278	-19.5007	5.98664e-74	4.07718e-72	157.593
RP11-212D19.5	5.78958	-5.76024	19.4994	6.14579e-74	4.17776e-72	157.567
SFRP1	-3.08116	0.543123	-19.4887	7.15401e-74	4.84505e-72	157.416
RP11-441F2.5	2.92794	1.14626	19.4877	7.26449e-74	4.91074e-72	157.401
OSBPL11	2.32994	2.87939	19.4837	7.71211e-74	5.20368e-72	157.341
AC093724.2	3.05331	-0.896663	19.4757	8.68751e-74	5.85098e-72	157.222
RP11-1E11.1	5.863	-5.37932	19.4559	1.17563e-73	7.90317e-72	156.921
AC079776.3	-4.1543	-8.09133	-19.4509	1.26511e-73	8.47389e-72	156.848
MEG9	-3.37006	0.298294	-19.4505	1.26518e-73	8.47389e-72	156.848
TSPAN12	2.47478	2.18289	19.4483	1.30723e-73	8.73948e-72	156.816
FREM3	6.64123	-0.0137478	19.4387	1.51815e-73	1.0131e-71	156.667
CTD-3092A11.2	-2.23117	0.76661	-19.428	1.7669e-73	1.17694e-71	156.516
LRRC32	-2.98831	1.50486	-19.3995	2.70043e-73	1.79549e-71	156.093
EIF4BP7	2.30426	-1.264	19.3958	2.85155e-73	1.89251e-71	156.039
FLVCR2	2.45978	-0.248748	19.3921	3.01278e-73	1.99588e-71	155.984
SH3GL3	-3.09737	3.34066	-19.3896	3.13039e-73	2.07003e-71	155.946
RP13-88F20.1	4.46698	-6.72814	19.3756	3.88121e-73	2.56188e-71	155.732
SSPN	2.3929	3.18705	19.3738	3.95528e-73	2.60605e-71	155.714
CDKL1	2.43754	2.77453	19.3671	4.36991e-73	2.86886e-71	155.614
VEPH1	4.82233	-1.21625	19.3608	4.83642e-73	3.16942e-71	155.513
CD38	3.02152	1.66584	19.3448	6.08915e-73	3.97606e-71	155.284
CTD-2561J22.2	3.47582	-2.04491	19.344	6.17365e-73	4.02403e-71	155.27
C1QTNF5	2.59618	3.75177	19.3328	7.27392e-73	4.73272e-71	155.107
DAG1	2.04693	4.41496	19.321	8.67292e-73	5.62289e-71	154.932
LRRN1	2.52556	3.67162	19.317	9.19744e-73	5.95236e-71	154.873
DRAXIN	2.76224	-0.322032	19.3113	1.0013e-72	6.46871e-71	154.789
HIF1A	2.24049	4.90278	19.3091	1.03457e-72	6.67179e-71	154.756
RP1-138B7.5	-9.80707	-7.16094	-19.2978	1.23068e-72	7.90849e-71	154.584
TMEM169	2.13038	1.161	19.2871	1.43213e-72	9.18682e-71	154.433
ERVMER34-1	3.40047	-1.66861	19.2807	1.57908e-72	1.00939e-70	154.335
RP11-496D24.2	-4.89232	-4.86049	-19.2696	1.86945e-72	1.19083e-70	154.167
MEMO1P1	2.87211	-0.444872	19.2344	3.12844e-72	1.98585e-70	153.655
NPPB	-6.30599	-6.11973	-19.2301	3.35795e-72	2.12783e-70	153.584
LA16c-349E10.1	-3.71041	-1.26297	-19.2128	4.3283e-72	2.73795e-70	153.332
AC144530.1	6.09667	-4.01105	19.2087	4.60663e-72	2.90897e-70	153.27
SNX31	5.66945	-0.961879	19.2063	4.7741e-72	3.0043e-70	153.234
HEY1	2.2903	4.861	19.1738	7.66524e-72	4.79881e-70	152.763
ID4	2.8179	5.69002	19.1604	9.34386e-72	5.83967e-70	152.566
TFAP2A-AS1	5.54358	-3.55272	19.1606	9.38579e-72	5.85583e-70	152.561
RP11-361L15.5	-3.59631	0.0527447	-19.1573	9.82429e-72	6.11894e-70	152.516
SIGIRR	-2.6288	3.58025	-19.1364	1.33284e-71	8.28727e-70	152.212
CTA-315H11.2	-4.35439	-4.5204	-19.1305	1.46347e-71	9.08401e-70	152.119
NKX6-2	-3.96649	1.40942	-19.1273	1.53375e-71	9.50403e-70	152.072
NTRK2	3.02278	7.97226	19.1011	2.2419e-71	1.37983e-69	151.694
IQUB	2.79086	-1.94027	19.0868	2.76957e-71	1.70172e-69	151.484
GOLM1	2.12353	6.27874	19.0724	3.42509e-71	2.10095e-69	151.272
TMEM184A	-4.43698	-5.18256	-19.0722	3.45695e-71	2.11693e-69	151.263
RP11-109L13.1	7.1495	-5.10067	19.0496	4.82102e-71	2.92278e-69	150.932
RP11-510C10.4	-2.69136	-9.94576	-19.0412	5.42271e-71	3.27665e-69	150.815
LIFR	2.30405	3.4426	19.0378	5.69517e-71	3.43558e-69	150.766
RAB39A	3.16506	-0.466437	19.0291	6.47597e-71	3.90014e-69	150.638
PHC1P1	2.786	1.30996	19.0263	6.74905e-71	4.05121e-69	150.597
RP11-5O23.2	-4.41515	-8.34312	-19.0264	6.78101e-71	4.0637e-69	150.593
PRRX1	2.26296	3.29014	19.0211	7.28734e-71	4.35996e-69	150.521
RP11-449H3.3	5.62143	-5.04179	19.0182	7.6591e-71	4.57487e-69	150.471
KCNN3	2.57675	2.77691	19.0088	8.72633e-71	5.1953e-69	150.341
RP11-449D8.1	5.30562	-5.66583	19.0088	8.79033e-71	5.22487e-69	150.334
CYP4A22	-3.87954	-5.22544	-19.0074	8.96808e-71	5.32184e-69	150.314
NR1H4	5.61622	-3.92293	19.0038	9.45646e-71	5.60253e-69	150.262
OR52E2	4.20385	-8.349	19.0009	9.86952e-71	5.83776e-69	150.219
RP11-545A16.3	4.39409	-2.54262	18.9835	1.27427e-70	7.51283e-69	149.965
CD22	-3.63349	1.36049	-18.9784	1.37081e-70	8.06896e-69	149.892
CEP170P1	4.3597	-4.22897	18.9718	1.51414e-70	8.89828e-69	149.793
OR52A4P	4.7074	-7.72699	18.9669	1.62844e-70	9.55455e-69	149.72
KEL	-2.56882	-1.7404	-18.949	2.10443e-70	1.23077e-68	149.465
AC083867.4	6.44631	-5.8247	18.945	2.24362e-70	1.31007e-68	149.401
SLC12A4	2.07152	3.85602	18.933	2.6581e-70	1.54961e-68	149.233
ATP5J2-PTCD1	3.52329	1.33378	18.9277	2.88656e-70	1.68011e-68	149.151
SLIT1	3.16638	5.3013	18.9212	3.16181e-70	1.83738e-68	149.06
TARID	-5.18313	-6.29855	-18.9117	3.65878e-70	2.11605e-68	148.915
RP11-473N11.2	3.95067	-5.11561	18.9075	3.89505e-70	2.24913e-68	148.852
CDK15	4.96269	-4.86541	18.9051	4.03101e-70	2.32396e-68	148.818
NOTCH2	2.36938	3.35402	18.9009	4.25915e-70	2.44773e-68	148.763
ANOS1	2.45405	2.71296	18.9004	4.29178e-70	2.4626e-68	148.756
NKX2-1	-4.85525	-4.45953	-18.8976	4.49911e-70	2.57751e-68	148.709
RASL11B	2.71625	3.18495	18.892	4.85606e-70	2.77763e-68	148.633
ZNF490	2.51637	-0.734395	18.8893	5.04674e-70	2.88218e-68	148.595
FTLP3	-2.64935	1.24328	-18.8874	5.19463e-70	2.95737e-68	148.566
AC006946.17	-5.2557	-4.08236	-18.8873	5.23244e-70	2.97424e-68	148.559
RP1-40E16.9	-3.54062	-2.35149	-18.8839	5.48571e-70	3.11335e-68	148.512
KIAA1211	2.20932	1.38639	18.878	5.9619e-70	3.37835e-68	148.429
RP11-174G6.5	-2.46279	-3.04894	-18.8727	6.44066e-70	3.64398e-68	148.352
SHTN1	-2.86622	3.86284	-18.8711	6.58917e-70	3.72222e-68	148.329
CDH10	2.43912	4.41808	18.8673	6.973e-70	3.93295e-68	148.273
IL12A-AS1	4.70104	-1.05319	18.8665	7.09616e-70	3.99622e-68	148.255
RPE65	4.92156	-2.0517	18.8659	7.16236e-70	4.02728e-68	148.246
RP11-452L6.6	3.41939	-2.85896	18.8606	7.70474e-70	4.32558e-68	148.173
SLC9A5	-2.11837	0.768727	-18.8564	8.18114e-70	4.58597e-68	148.114
MGAT4C	3.19075	2.09884	18.8547	8.38514e-70	4.6931e-68	148.089
RPL7P47	5.09901	-7.16792	18.8527	8.68782e-70	4.85505e-68	148.054
CDKN2A	3.24426	1.3174	18.8509	8.86898e-70	4.9487e-68	148.033
RP11-173C1.1	-3.57458	-0.528027	-18.8474	9.36614e-70	5.21811e-68	147.979
AC000089.3	4.68127	-2.55927	18.8408	1.03508e-69	5.74908e-68	147.88
DUSP27	3.40555	-1.04311	18.8395	1.05033e-69	5.82493e-68	147.865
ENOSF1	-2.59722	2.26493	-18.8377	1.07535e-69	5.95464e-68	147.841
PIK3R1	2.26356	5.52108	18.8368	1.08917e-69	6.01289e-68	147.829
RPL12P38	4.91644	-4.42863	18.829	1.22858e-69	6.77226e-68	147.709
TCF4	2.05655	4.88622	18.8159	1.47892e-69	8.13985e-68	147.524
PAIP2B	-3.00609	2.48655	-18.8105	1.60176e-69	8.78941e-68	147.445
RP11-234G16.5	-5.62486	-3.59888	-18.8038	1.77842e-69	9.74413e-68	147.341
NEUROD1	4.54334	1.43608	18.8018	1.83046e-69	1.00142e-67	147.312
MTTP	2.58319	-1.02671	18.7939	2.04023e-69	1.11284e-67	147.204
ITPRIPL1	2.70777	-1.13705	18.7929	2.06966e-69	1.12721e-67	147.19
EEF1A1P6	2.41416	2.0557	18.7872	2.25178e-69	1.22456e-67	147.106
PDIA2	-3.10893	3.71322	-18.768	2.98071e-69	1.61856e-67	146.827
RP11-810K23.6	5.74623	-6.8827	18.7639	3.18267e-69	1.72565e-67	146.761
KIF25	-4.03535	-1.72778	-18.7623	3.26161e-69	1.76583e-67	146.737
SLC16A9	2.5344	2.54131	18.7564	3.52958e-69	1.90807e-67	146.658
RP11-626K17.3	3.6292	-7.64137	18.7541	3.66843e-69	1.97726e-67	146.62
MSI1	2.00801	2.84451	18.7496	3.89665e-69	2.09717e-67	146.56
RP11-265N6.2	-7.73941	-3.07345	-18.7432	4.30632e-69	2.31423e-67	146.461
MKRN3-AS1	6.90948	-3.70312	18.7386	4.60408e-69	2.46335e-67	146.394
MYLK3	4.04228	-0.78468	18.7282	5.3632e-69	2.86111e-67	146.242
AGT	3.00831	7.41902	18.7177	6.20645e-69	3.30611e-67	146.097
PTPRT	3.39281	3.56153	18.7156	6.41732e-69	3.41345e-67	146.063
WNT9B	3.92871	-1.28529	18.7149	6.50612e-69	3.45564e-67	146.05
SELM	-2.73402	5.49345	-18.7049	7.48632e-69	3.97047e-67	145.91
KRT8P50	-4.8934	-6.76955	-18.6887	9.53914e-69	5.04453e-67	145.669
FAM91A3P	4.77317	-5.57667	18.6848	1.00952e-68	5.33087e-67	145.612
GOLGA6L2	5.51931	-6.39312	18.6793	1.0932e-68	5.7644e-67	145.533
CCT7P2	6.04097	-4.96863	18.6713	1.22926e-68	6.47243e-67	145.416
RP11-14N7.2	-2.59125	4.00284	-18.6578	1.48747e-68	7.8207e-67	145.227
CTB-32H22.1	5.21844	-7.35338	18.6499	1.67758e-68	8.80754e-67	145.107
CTD-2132N18.2	2.58787	-0.0814258	18.6438	1.82294e-68	9.55692e-67	145.024
CYCSP45	6.59782	-6.89901	18.6283	2.29983e-68	1.20397e-66	144.793
CTC-458G6.2	6.47487	-5.07448	18.6201	2.59095e-68	1.35443e-66	144.674
RP11-1081L13.4	2.06026	1.34617	18.6187	2.62511e-68	1.37032e-66	144.661
AC068831.15	-3.49149	2.78677	-18.6181	2.65836e-68	1.38569e-66	144.649
ATP2A3	-2.48681	-1.06587	-18.5919	3.877e-68	2.00942e-66	144.273
COL7A1	-2.72929	2.28499	-18.5849	4.29672e-68	2.2238e-66	144.171
GRB14	-3.49408	0.768894	-18.5572	6.44466e-68	3.31663e-66	143.767
IPO8P1	4.48473	-3.62391	18.5461	7.5885e-68	3.89978e-66	143.605
RP11-267C16.1	-3.62716	-2.5522	-18.5449	7.70558e-68	3.95437e-66	143.589
CTD-2510F5.6	-9.3792	-5.12764	-18.5266	1.00706e-67	5.15354e-66	143.323
HSF2BP	2.12593	-0.745115	18.5253	1.02052e-67	5.21511e-66	143.31
RARRES2P1	6.57189	-1.60119	18.5235	1.05364e-67	5.37679e-66	143.278
ADAMTS15	2.95572	-1.57864	18.4996	1.4799e-67	7.53096e-66	142.94
BTBD17	3.26827	1.12259	18.4851	1.82912e-67	9.2951e-66	142.729
LMNTD1	5.62609	-0.467352	18.4836	1.8772e-67	9.52612e-66	142.703
LINC00298	3.38353	-1.39668	18.4829	1.89105e-67	9.58309e-66	142.696
SORL1	2.11689	4.6617	18.4779	2.02835e-67	1.02646e-65	142.626
BHLHE22	-4.23235	-0.476519	-18.4718	2.22974e-67	1.12681e-65	142.532
NUS1P1	3.74518	-0.7057	18.4695	2.30414e-67	1.16279e-65	142.499
CTD-2349P21.12	-2.34795	1.08395	-18.4279	4.17832e-67	2.0855e-65	141.907
EPHB1	2.54867	3.34194	18.4229	4.49636e-67	2.24117e-65	141.834
RP11-354P17.15	-4.68273	-5.13158	-18.4012	6.18266e-67	3.07328e-65	141.517
RP11-566K19.6	-3.18023	2.02485	-18.3988	6.37421e-67	3.16418e-65	141.486
AC005077.14	-4.06403	-4.31683	-18.395	6.76307e-67	3.35264e-65	141.428
CYP4Z1	-4.84955	-2.9398	-18.3805	8.34677e-67	4.1265e-65	141.218
GLCCI1	2.188	3.31216	18.3732	9.21759e-67	4.55084e-65	141.119
AC003006.7	7.24814	-4.94488	18.3722	9.40088e-67	4.63506e-65	141.1
ANKRD30B	-4.97914	-2.14414	-18.3715	9.50469e-67	4.67991e-65	141.089
BOK	-3.08735	2.45315	-18.3657	1.02676e-66	5.04871e-65	141.012
HIST1H3PS1	5.11066	-7.32697	18.3656	1.03464e-66	5.08059e-65	141.004
RP11-92B11.3	6.58797	-1.75681	18.3636	1.06411e-66	5.21827e-65	140.976
S1PR5	-3.57179	0.119968	-18.351	1.27525e-66	6.24531e-65	140.796
HAGHL	-2.32943	3.74682	-18.3376	1.54104e-66	7.53684e-65	140.608
MMD	-2.25604	3.91544	-18.319	2.01534e-66	9.81695e-65	140.341
AC006386.1	4.66332	-7.39054	18.3115	2.2565e-66	1.0977e-64	140.228
LIX1	2.86179	3.74084	18.3052	2.4585e-66	1.19437e-64	140.143
LINC01094	2.81123	2.07607	18.2914	2.99638e-66	1.45374e-64	139.946
SPACA6P	-2.27097	2.7406	-18.2833	3.36717e-66	1.63147e-64	139.83
CDR1	-3.35078	1.16221	-18.2763	3.73674e-66	1.80573e-64	139.726
CCDC144NL	-4.52174	-5.70892	-18.2639	4.48159e-66	2.1628e-64	139.545
RP11-710C12.1	-2.89182	-0.663395	-18.2524	5.25734e-66	2.53381e-64	139.386
CDCA7	2.42171	-0.0356123	18.2501	5.42949e-66	2.61333e-64	139.354
AL592528.1	4.54654	-5.64411	18.236	6.69379e-66	3.20914e-64	139.146
RP4-789D17.3	-7.02132	-1.93098	-18.2357	6.71835e-66	3.21668e-64	139.142
RP11-715J22.4	3.822	-0.585362	18.2291	7.39251e-66	3.53482e-64	139.047
RP11-317N8.4	5.66584	-5.25991	18.2248	7.85502e-66	3.74718e-64	138.987
RCOR2	2.72101	2.74192	18.2215	8.1895e-66	3.90056e-64	138.945
RP11-447D11.3	2.46938	-1.0627	18.2192	8.46862e-66	4.02823e-64	138.912
DYSF	-2.62423	1.55806	-18.2146	9.05212e-66	4.30017e-64	138.846
ZBTB20-AS4	5.53931	-3.43547	18.2112	9.55124e-66	4.53137e-64	138.792
PKP4	-2.43812	4.69338	-18.1609	1.95553e-65	9.21755e-64	138.079
CTD-3162L10.1	-2.59599	1.45713	-18.151	2.25295e-65	1.06058e-63	137.938
AC000068.5	2.11668	-1.69248	18.1497	2.2965e-65	1.07968e-63	137.919
SNHG23	-3.70016	0.518413	-18.1477	2.37726e-65	1.11621e-63	137.885
WEE2-AS1	2.14103	0.750173	18.1454	2.44297e-65	1.14411e-63	137.858
AC005307.1	-3.86745	-9.51465	-18.1428	2.54986e-65	1.19264e-63	137.815
ARHGEF5	-2.41865	-2.49638	-18.1397	2.65147e-65	1.23857e-63	137.776
TP53INP2	-2.86476	4.4101	-18.13	3.04722e-65	1.42162e-63	137.638
FAM150B	-3.35647	-0.768685	-18.1249	3.28731e-65	1.53167e-63	137.562
TEPP	-4.45864	-3.96114	-18.1242	3.32975e-65	1.54946e-63	137.549
ASTN1	2.17346	4.97374	18.1232	3.35977e-65	1.56144e-63	137.54
ADORA2A	-2.47152	1.31535	-18.1089	4.12281e-65	1.91362e-63	137.337
SNCAIP	2.23147	2.05706	18.0949	5.03339e-65	2.33329e-63	137.138
FZD7	2.66592	1.58704	18.094	5.10173e-65	2.36197e-63	137.125
AQP5	-5.10641	-1.80588	-18.0912	5.33812e-65	2.46827e-63	137.08
HILS1	-5.56791	-2.95289	-18.0727	6.96147e-65	3.2148e-63	136.815
ZFP57	-4.10426	-2.22537	-18.071	7.13399e-65	3.2903e-63	136.791
BCO1	2.8514	-0.900282	18.0686	7.33588e-65	3.37914e-63	136.763
AC016757.3	-2.59116	0.473508	-18.0517	9.3387e-65	4.29086e-63	136.523
SLC18A2	-5.27003	-10.1394	-18.0496	9.68735e-65	4.43985e-63	136.487
RP11-830F9.5	-3.75209	-3.99972	-18.0435	1.05599e-64	4.83369e-63	136.401
RP5-991B18.1	5.51856	-7.27044	18.0384	1.1364e-64	5.1952e-63	136.328
NFIA-AS2	3.35133	-0.801717	18.0374	1.14909e-64	5.24664e-63	136.317
RP11-80P20.3	-2.36414	-2.18287	-18.027	1.32941e-64	6.06239e-63	136.172
RNF128	-4.07844	-0.660729	-18.0227	1.42105e-64	6.47216e-63	136.105
RP11-196G11.2	-3.12957	-0.639711	-18.0222	1.42424e-64	6.47862e-63	136.103
CTD-2514K5.4	-11.07	-3.36648	-18.0197	1.48296e-64	6.73731e-63	136.063
CRNN	-5.79839	-7.07713	-18.0043	1.8486e-64	8.38799e-63	135.844
SLCO2A1	2.47173	0.682181	18.0019	1.90379e-64	8.62767e-63	135.814
AGGF1P3	5.28233	-4.23869	17.9979	2.02462e-64	9.16384e-63	135.753
ADRA1A	2.50744	1.3726	17.9906	2.23564e-64	1.00939e-62	135.654
PRSS54	5.47608	-5.92251	17.9857	2.41126e-64	1.08599e-62	135.579
RP11-407G23.7	-2.90683	-0.862447	-17.9758	2.76007e-64	1.23849e-62	135.445
RP11-439M11.1	-5.50408	-1.46782	-17.9716	2.94639e-64	1.32048e-62	135.38
ATG9B	-2.3593	0.340376	-17.9691	3.03924e-64	1.36042e-62	135.349
RP11-889L3.1	-2.21523	2.9597	-17.9566	3.63233e-64	1.62191e-62	135.171
ECHDC2	-2.56481	4.37186	-17.9475	4.13134e-64	1.84021e-62	135.043
SLC8A1	2.25742	2.23659	17.94	4.59777e-64	2.04298e-62	134.937
TRAF6P1	4.10132	-7.74161	17.9402	4.61102e-64	2.04637e-62	134.934
GREM1	-4.08871	-1.40744	-17.9343	5.01342e-64	2.22225e-62	134.851
CLU	3.37092	13.2761	17.933	5.09717e-64	2.25663e-62	134.834
RP11-260O18.1	4.58979	-7.78336	17.9298	5.34707e-64	2.36439e-62	134.787
GABRB1	2.74436	2.72656	17.9292	5.3645e-64	2.36922e-62	134.783
MICALL2	-2.50431	4.21663	-17.9254	5.6576e-64	2.49565e-62	134.73
LINC00336	-4.43289	-6.28818	-17.9238	5.82307e-64	2.56553e-62	134.702
MRPL41	-2.3668	5.74683	-17.9218	5.96311e-64	2.62405e-62	134.678
SLC16A4	2.08044	1.06208	17.9124	6.81378e-64	2.99117e-62	134.545
ASCL1	2.44447	3.42042	17.9106	6.99168e-64	3.06557e-62	134.52
BCL9L	2.09979	3.15611	17.9076	7.29163e-64	3.19324e-62	134.478
LRRTM4	2.72516	2.68675	17.9021	7.88926e-64	3.44668e-62	134.399
TMPRSS6	-3.78165	-6.43519	-17.9018	7.96326e-64	3.47484e-62	134.39
RPL7P6	4.4712	-7.28271	17.8959	8.65761e-64	3.77331e-62	134.307
PPP1R14A	-3.23984	3.2884	-17.8919	9.13577e-64	3.97221e-62	134.253
SIDT1	2.67664	2.8415	17.8906	9.2947e-64	4.03649e-62	134.236
ANGPTL1	2.94346	0.796188	17.8678	1.28527e-63	5.56839e-62	133.914
CTD-2006M22.2	2.7319	-1.33698	17.867	1.29891e-63	5.6208e-62	133.903
ADGRV1	3.31032	5.87138	17.8524	1.60268e-63	6.91887e-62	133.694
RP11-324O2.3	-2.01288	-0.0589592	-17.8514	1.62155e-63	6.99205e-62	133.682
RP11-192H23.8	-2.5985	2.44077	-17.8508	1.63582e-63	7.04522e-62	133.674
LHFPL4	2.32835	3.91372	17.8486	1.68622e-63	7.25372e-62	133.644
CDON	2.21324	0.555903	17.8389	1.93633e-63	8.31001e-62	133.506
ADSSL1	-2.10473	1.33594	-17.8381	1.95797e-63	8.39302e-62	133.495
RP11-565P22.6	6.38458	-4.51682	17.833	2.11679e-63	9.06314e-62	133.417
RP11-373D23.2	-8.1039	-3.85246	-17.8326	2.12997e-63	9.10888e-62	133.411
LACC1	-2.53376	0.0392749	-17.8277	2.26869e-63	9.69076e-62	133.348
AC058791.1	-2.4963	-0.317754	-17.8201	2.52813e-63	1.07863e-61	133.24
NOTCH1	2.04638	3.04631	17.8064	3.07013e-63	1.30834e-61	133.047
DRD2	-2.92632	-1.36982	-17.7986	3.43104e-63	1.45873e-61	132.937
COCH	-2.98365	0.100752	-17.7871	4.03861e-63	1.71305e-61	132.774
RP5-1172N10.4	-9.26522	-8.01908	-17.7838	4.2519e-63	1.80142e-61	132.723
AMBN	-4.46045	-8.3535	-17.7818	4.37268e-63	1.8483e-61	132.695
RP11-855A2.5	6.76005	-3.48246	17.7787	4.57103e-63	1.92989e-61	132.651
RP11-809C18.3	-4.01574	-0.445149	-17.774	4.88411e-63	2.05969e-61	132.585
TRPV5	-4.52527	-6.49967	-17.7702	5.15593e-63	2.17181e-61	132.531
CASP14	-4.52086	-7.74768	-17.768	5.32238e-63	2.23933e-61	132.5
NES	2.38946	3.55894	17.7639	5.61218e-63	2.35854e-61	132.447
CTD-2531D15.5	-11.0316	-4.85479	-17.7485	7.01267e-63	2.94032e-61	132.225
SV2C	-3.95567	-2.24648	-17.7426	7.61709e-63	3.17911e-61	132.143
FABP1	-6.51034	-4.13329	-17.7385	8.07699e-63	3.3672e-61	132.085
LINC00893	-2.30944	1.05539	-17.7346	8.48779e-63	3.53441e-61	132.035
LPAR1	-3.28031	3.17873	-17.7245	9.82465e-63	4.08177e-61	131.89
RP1-35C21.2	6.90441	-0.701735	17.7223	1.01602e-62	4.21638e-61	131.856
ANO9	-4.2147	-5.43256	-17.719	1.06454e-62	4.41268e-61	131.81
HPSE	2.51692	-0.869007	17.7173	1.08526e-62	4.49348e-61	131.791
FABP5	-3.14083	4.35617	-17.7153	1.11643e-62	4.61727e-61	131.763
RP11-384F7.2	2.24105	2.68828	17.708	1.23718e-62	5.10507e-61	131.66
ZNF770	2.02435	2.72634	17.7072	1.25043e-62	5.15393e-61	131.65
WISP3	-2.43897	-3.20763	-17.7045	1.2989e-62	5.34161e-61	131.612
RPRM	2.80086	3.53481	17.7038	1.31169e-62	5.38208e-61	131.602
STT3A-AS1	5.82973	-7.28383	17.7018	1.35679e-62	5.56086e-61	131.569
YDJC	-2.12731	2.54268	-17.6963	1.46003e-62	5.97056e-61	131.495
LINC00928	5.24344	-2.22167	17.6757	1.96247e-62	7.99825e-61	131.201
ACTG1P1	4.22746	-2.61128	17.6724	2.05512e-62	8.36653e-61	131.155
TCFL5	-2.27079	2.62994	-17.6676	2.18942e-62	8.90331e-61	131.092
EEF1A1P10	4.28153	-6.48074	17.6646	2.29575e-62	9.31492e-61	131.045
RP11-662I13.3	-4.33246	-4.37674	-17.6626	2.35954e-62	9.56309e-61	131.018
RXFP2	-4.12251	-10.0245	-17.661	2.41648e-62	9.78299e-61	130.994
ABCA7	-2.10405	2.24685	-17.6557	2.58964e-62	1.04724e-60	130.925
COX7CP1	-8.17871	-1.35174	-17.6513	2.76851e-62	1.11833e-60	130.859
LINC00523	-4.25404	-9.59144	-17.6451	3.02381e-62	1.21741e-60	130.771
GHRHR	4.13449	1.06074	17.6418	3.16803e-62	1.27266e-60	130.725
RP11-84A19.2	-4.0163	-9.79055	-17.6414	3.18391e-62	1.27763e-60	130.72
RAD1P2	5.39805	-7.13949	17.6348	3.49428e-62	1.40063e-60	130.627
FAM71E1	-2.27207	1.64128	-17.6244	4.02349e-62	1.61099e-60	130.487
SPARCL1	2.87205	10.9305	17.6239	4.05444e-62	1.6216e-60	130.479
RP11-379B8.1	4.89401	-7.26867	17.6235	4.09667e-62	1.63669e-60	130.469
PHKA1P1	5.72026	-2.09816	17.6194	4.34137e-62	1.73255e-60	130.411
ASPDH	-2.61724	4.08475	-17.6033	5.41693e-62	2.15706e-60	130.191
CTC-526N19.1	-3.47514	-3.27378	-17.6001	5.69027e-62	2.26344e-60	130.142
DAND5	3.01939	-2.69369	17.5903	6.51412e-62	2.58831e-60	130.007
AC128709.3	-5.145	-10.7789	-17.5883	6.73313e-62	2.67242e-60	129.974
CERCAM	-3.12027	4.34736	-17.5814	7.3872e-62	2.92884e-60	129.882
CTD-2527I21.15	-4.59238	-4.25601	-17.5784	7.73834e-62	3.06472e-60	129.836
RP11-680A11.5	-2.02284	-0.724519	-17.5771	7.84315e-62	3.10286e-60	129.823
NXPH3	2.19328	3.21379	17.5591	1.01033e-61	3.98835e-60	129.571
C1orf127	-4.42828	-7.25492	-17.5558	1.0631e-61	4.19213e-60	129.52
ELAVL4	2.73243	4.41924	17.554	1.08464e-61	4.27241e-60	129.5
AC092155.1	5.81226	-5.3753	17.5521	1.11915e-61	4.4036e-60	129.469
CTD-2089N3.2	-3.77582	-10.337	-17.5485	1.17873e-61	4.63305e-60	129.417
DTHD1	4.78829	-3.16629	17.5332	1.46055e-61	5.73454e-60	129.204
SCN3A	2.45345	2.62875	17.5281	1.56057e-61	6.12067e-60	129.138
LIPG	3.18232	-0.744511	17.525	1.63337e-61	6.39932e-60	129.093
RP11-632P5.1	4.98404	-2.46962	17.5152	1.88162e-61	7.36397e-60	128.952
NOTCH2NL	3.64196	-1.80882	17.5148	1.89149e-61	7.39468e-60	128.947
RASSF7	-2.15821	1.89168	-17.5051	2.15782e-61	8.42684e-60	128.816
TMEM178B	2.01103	2.86231	17.5041	2.18699e-61	8.53162e-60	128.802
SRCIN1	-2.63815	3.17737	-17.502	2.25313e-61	8.78021e-60	128.773
YWHAZP5	4.59558	-1.37801	17.495	2.49639e-61	9.71779e-60	128.671
RP11-172E10.1	5.38595	-6.28123	17.4944	2.51902e-61	9.79543e-60	128.662
TMEM132E	2.47868	2.00322	17.4858	2.82707e-61	1.09582e-59	128.547
RP11-174J11.1	5.69697	-5.99333	17.4853	2.8603e-61	1.10752e-59	128.535
NCAN	2.79108	6.04131	17.4848	2.86665e-61	1.1088e-59	128.533
CTD-3105H18.18	6.55263	-3.36508	17.4808	3.04849e-61	1.17789e-59	128.472
C7orf72	-3.83808	-9.29279	-17.4775	3.19259e-61	1.23226e-59	128.426
RP5-827C21.6	-4.95473	-0.00611954	-17.4728	3.41181e-61	1.31548e-59	128.36
RP11-286E11.1	-3.89493	-2.56853	-17.4547	4.39841e-61	1.6923e-59	128.107
DKFZp434P228	6.1867	-1.18368	17.4483	4.80988e-61	1.84866e-59	128.018
BMPR1B	2.4015	3.04914	17.4432	5.13923e-61	1.97316e-59	127.952
ACKR4	3.19312	-2.0773	17.4308	6.12604e-61	2.34956e-59	127.777
CASC11	4.8681	-5.61679	17.4225	6.8971e-61	2.63974e-59	127.659
EEF1A1P29	3.59143	-8.33713	17.422	6.95241e-61	2.65811e-59	127.651
FZD9	-2.1587	0.139861	-17.4046	8.81785e-61	3.36074e-59	127.415
CCDC78	-2.51097	1.58731	-17.4033	8.98251e-61	3.41992e-59	127.396
CRACR2B	-2.13659	0.384409	-17.4021	9.13893e-61	3.47585e-59	127.379
GPR143	-2.4683	1.01667	-17.397	9.80611e-61	3.72571e-59	127.309
HNRNPA1P8	4.15204	-7.30087	17.3963	9.9606e-61	3.78046e-59	127.294
RPS7P4	4.41847	-7.44641	17.3899	1.08827e-60	4.12613e-59	127.206
AC092675.4	4.82552	-7.63374	17.3866	1.14052e-60	4.31975e-59	127.159
RP11-421P23.2	5.85343	-6.41405	17.3852	1.16358e-60	4.4025e-59	127.139
TMPPE	2.10068	-2.32249	17.383	1.19306e-60	4.50938e-59	127.114
CD24	3.38636	3.74416	17.3814	1.22389e-60	4.62109e-59	127.089
CCDC144CP	2.29807	-0.948101	17.3795	1.25348e-60	4.72792e-59	127.065
PYROXD2	-2.15902	1.0898	-17.359	1.66971e-60	6.27837e-59	126.78
COL4A6	3.26396	-2.6367	17.3557	1.75199e-60	6.58097e-59	126.732
TJP2	2.38786	4.12455	17.3194	2.90084e-60	1.08807e-58	126.23
RP11-429A20.4	-4.69356	-1.17013	-17.3197	2.90263e-60	1.08807e-58	126.229
HHATL	-3.04814	4.49192	-17.3182	2.95215e-60	1.10549e-58	126.213
RP11-204C16.4	5.15879	-2.23565	17.3182	2.96592e-60	1.10951e-58	126.208
CTC-325H20.7	5.08124	-1.70326	17.3176	2.98901e-60	1.117e-58	126.2
B3GNT7	-2.50346	-0.11403	-17.3062	3.48639e-60	1.29847e-58	126.047
LCAT	2.18534	3.90439	17.2957	4.03979e-60	1.50198e-58	125.9
RP11-314C16.1	-2.1754	-0.615247	-17.2945	4.1053e-60	1.52478e-58	125.884
NADK2-AS1	5.7399	-3.4614	17.2932	4.19995e-60	1.55834e-58	125.862
CDC42P1	4.34734	-7.92098	17.291	4.33299e-60	1.60607e-58	125.831
GFAP	3.70136	11.8411	17.2813	4.95878e-60	1.83429e-58	125.697
AC006466.5	7.31927	-1.15268	17.2796	5.08032e-60	1.87735e-58	125.672
SOWAHA	-3.17175	3.81957	-17.2692	5.84902e-60	2.15703e-58	125.532
CTB-118P15.2	4.96547	-7.25515	17.2663	6.1104e-60	2.25115e-58	125.489
RP11-231P20.2	-3.20379	-1.3529	-17.2636	6.32748e-60	2.32642e-58	125.454
VSTM2B	-2.71409	3.27095	-17.2598	6.65603e-60	2.44475e-58	125.404
SYTL4	2.71803	2.82425	17.2325	9.73167e-60	3.56365e-58	125.026
SIX3-AS1	-5.77863	-3.03189	-17.2298	1.01571e-59	3.71572e-58	124.983
ZNF724P	2.96021	-2.81485	17.2279	1.03802e-59	3.79351e-58	124.962
LINC01260	-2.5511	0.235354	-17.2229	1.11272e-59	4.05961e-58	124.892
CTD-2540M10.1	7.56874	-1.4823	17.2219	1.13289e-59	4.12778e-58	124.875
CCDC141	2.83392	-2.69018	17.2202	1.15491e-59	4.20381e-58	124.855
RP11-417L14.1	4.75723	-7.90454	17.2141	1.26314e-59	4.5886e-58	124.766
FAM60A	2.15738	0.502877	17.2134	1.26996e-59	4.6088e-58	124.761
PWRN1	-5.41425	-3.25852	-17.2097	1.34269e-59	4.86788e-58	124.706
ADAM33	-2.63647	1.75141	-17.2042	1.44211e-59	5.22315e-58	124.634
GLP1R	5.73583	-2.97028	17.2033	1.46862e-59	5.31386e-58	124.616
COX6A1P2	-2.03132	2.5473	-17.1949	1.64099e-59	5.93167e-58	124.506
TP53	2.01522	2.45066	17.1932	1.68106e-59	6.07047e-58	124.482
NKAIN3	2.69829	0.724035	17.1878	1.81109e-59	6.52708e-58	124.408
CYP2D7	-2.25632	1.27658	-17.1846	1.89349e-59	6.81291e-58	124.363
RP11-411B10.7	-2.50287	0.459204	-17.1805	2.0044e-59	7.20241e-58	124.307
LINC01299	-4.82482	-3.98814	-17.1787	2.06474e-59	7.41191e-58	124.277
RPL13AP3	3.90079	-7.71157	17.1699	2.33316e-59	8.359e-58	124.156
C1orf94	2.66322	-1.87119	17.16	2.66471e-59	9.5281e-58	124.024
TDRD10	-2.11524	-0.698972	-17.1596	2.67972e-59	9.5724e-58	124.018
LRRC17	2.24818	0.764689	17.1548	2.86586e-59	1.02073e-57	123.951
U82695.9	-4.30098	-3.22117	-17.1416	3.45533e-59	1.22869e-57	123.765
CTA-14H9.5	-2.79692	1.24948	-17.1395	3.53878e-59	1.25549e-57	123.741
RP11-863P13.3	-5.48509	-6.02984	-17.1282	4.16066e-59	1.47325e-57	123.58
TIMP3	2.27275	5.60656	17.1273	4.19343e-59	1.48342e-57	123.572
LINC01088	3.78069	1.56975	17.1261	4.28361e-59	1.51385e-57	123.551
RP11-456K23.1	2.04564	-1.13118	17.1255	4.30025e-59	1.51826e-57	123.547
PPP1R27	-5.47186	-6.76103	-17.1205	4.63013e-59	1.63314e-57	123.474
C10orf142	-3.92032	-2.48174	-17.1152	4.98237e-59	1.75399e-57	123.401
RP11-442O1.4	-3.89243	-4.51282	-17.1118	5.22491e-59	1.8376e-57	123.354
GAB4	-3.7002	-11.0902	-17.1091	5.41955e-59	1.90055e-57	123.317
RP11-277P12.10	4.6272	-7.48025	17.1065	5.62243e-59	1.9698e-57	123.281
KCND2	2.5577	2.69563	17.1055	5.67231e-59	1.98536e-57	123.272
PIK3AP1	2.26438	0.00202269	17.1044	5.76183e-59	2.01476e-57	123.256
RP11-69H14.6	5.56737	-6.78905	17.0991	6.22987e-59	2.17425e-57	123.179
HTR1A	5.80564	1.09244	17.0915	6.9193e-59	2.41255e-57	123.074
NMRK2	-4.98002	-4.60288	-17.091	6.96268e-59	2.42536e-57	123.068
RPL17-C18orf32	2.7049	3.70064	17.0867	7.36195e-59	2.55954e-57	123.012
GRIK3	2.14164	2.54532	17.0807	7.99256e-59	2.77086e-57	122.931
CDRT4	-3.10579	1.37992	-17.0498	1.22862e-58	4.24723e-57	122.503
COL6A2	-2.35173	1.8056	-17.0491	1.23797e-58	4.27552e-57	122.495
RP6-24A23.7	-3.88346	-4.15813	-17.0448	1.32e-58	4.55449e-57	122.432
MYO10	2.1174	4.93768	17.0332	1.54217e-58	5.31603e-57	122.277
NAALAD2	-2.30875	1.07047	-17.0262	1.698e-58	5.84768e-57	122.181
CTB-13F3.1	-2.79917	-1.03421	-17.0216	1.80948e-58	6.22232e-57	122.118
ADRA2C	-2.47766	1.05452	-17.01	2.12249e-58	7.28888e-57	121.959
TMEM160	-2.31423	4.1322	-17.0076	2.19398e-58	7.5273e-57	121.926
WNT10B	-3.56702	2.38274	-17.0054	2.27172e-58	7.78667e-57	121.891
WEE2	3.28299	-4.20705	16.9974	2.53626e-58	8.68526e-57	121.782
AC005307.3	-4.48646	-7.35154	-16.9942	2.65198e-58	9.07301e-57	121.737
RPSAP53	5.80981	-4.89383	16.994	2.65899e-58	9.08845e-57	121.735
AC007461.2	4.21804	-4.88086	16.9901	2.80753e-58	9.57819e-57	121.681
EVPL	-4.11692	-3.86993	-16.9799	3.23171e-58	1.1015e-56	121.541
TSHR	4.39399	-2.16092	16.978	3.31576e-58	1.12804e-56	121.515
P2RY12	3.24697	2.66732	16.9768	3.36422e-58	1.14346e-56	121.501
RP11-1084I9.1	-4.73786	-2.89785	-16.9761	3.40699e-58	1.15692e-56	121.488
CLSTN2	2.53417	2.65496	16.9735	3.5146e-58	1.19235e-56	121.457
LIME1	-2.21652	2.68007	-16.9724	3.56707e-58	1.20902e-56	121.442
CTA-941F9.10	-2.73459	-6.71115	-16.9658	3.90574e-58	1.32135e-56	121.352
AC037459.4	6.1536	-3.70641	16.964	4.02002e-58	1.35875e-56	121.324
SLITRK3	2.57602	2.50905	16.9616	4.13638e-58	1.39678e-56	121.295
NAALADL2	2.02394	-1.13839	16.9614	4.15284e-58	1.40105e-56	121.291
RP11-103H7.2	4.92939	-7.85872	16.9615	4.16145e-58	1.40265e-56	121.289
RP11-192H23.6	-3.98876	-0.0372913	-16.955	4.55213e-58	1.53291e-56	121.2
ITGB8	2.07637	3.35604	16.9534	4.63579e-58	1.55964e-56	121.182
RP11-344E13.4	-4.46263	-5.30805	-16.9509	4.81783e-58	1.61939e-56	121.144
LINC00836	4.4482	-1.58215	16.9506	4.83731e-58	1.62445e-56	121.139
SLC1A3	2.75992	8.79341	16.9474	5.03069e-58	1.68783e-56	121.1
ANKRD65	-2.3412	2.62451	-16.9362	5.87073e-58	1.96786e-56	120.947
VWA2	2.48207	-0.986771	16.9358	5.90265e-58	1.97674e-56	120.941
PLCH2	-2.49903	2.89034	-16.9308	6.32943e-58	2.11577e-56	120.872
CH17-118O6.3	6.32085	-4.01298	16.931	6.33963e-58	2.11724e-56	120.87
LRRC4	2.03902	4.50957	16.929	6.48004e-58	2.16215e-56	120.849
CCDC178	4.30296	-1.19381	16.9262	6.76422e-58	2.2549e-56	120.806
RP11-215A21.2	5.29076	-3.29961	16.9218	7.19184e-58	2.39308e-56	120.745
PRG4	-3.6922	-6.13672	-16.9192	7.45023e-58	2.47679e-56	120.71
GNAQP1	4.86437	-4.20767	16.9162	7.76224e-58	2.57817e-56	120.669
RP5-892K4.1	-3.24524	-6.17659	-16.9112	8.30909e-58	2.75729e-56	120.601
SYTL1	-2.31767	-0.961419	-16.9082	8.63015e-58	2.86122e-56	120.564
RP11-693J15.4	4.34508	-5.27351	16.9078	8.72268e-58	2.88927e-56	120.553
C9orf24	-3.58799	3.35892	-16.9063	8.896e-58	2.94133e-56	120.533
AC072062.1	4.61917	-5.15566	16.905	9.0611e-58	2.9932e-56	120.515
RP11-977G19.10	7.51522	-1.74552	16.9048	9.0847e-58	2.99828e-56	120.512
AL158801.1	5.37202	-1.36257	16.9004	9.65654e-58	3.18124e-56	120.452
NRXN1	2.41487	5.27449	16.8989	9.80419e-58	3.22697e-56	120.437
MYL7	-5.05021	-1.31109	-16.8928	1.07088e-57	3.51519e-56	120.349
FBN2	3.03404	-3.02531	16.8902	1.1071e-57	3.63082e-56	120.316
RP11-313I2.7	4.94013	-7.81871	16.8838	1.21264e-57	3.96979e-56	120.225
MEF2C	2.33958	5.75375	16.8759	1.34535e-57	4.40028e-56	120.122
SFTPB	-4.97621	-4.72012	-16.8725	1.4158e-57	4.62656e-56	120.071
ZNF208	-3.8204	-1.37435	-16.8685	1.49508e-57	4.87689e-56	120.017
AC010980.2	-2.77693	0.561767	-16.8611	1.64785e-57	5.37041e-56	119.92
CYB5R2	-3.02496	0.932874	-16.8443	2.07849e-57	6.76781e-56	119.689
MYF6	-4.32352	-7.65172	-16.8425	2.13733e-57	6.95321e-56	119.661
RP5-837I24.1	4.01	-6.77406	16.8404	2.19972e-57	7.14978e-56	119.633
RP11-544L8__B.4	4.28471	-5.49025	16.8253	2.70635e-57	8.7808e-56	119.427
FAM83F	-3.49303	-6.98264	-16.815	3.11753e-57	1.01059e-55	119.286
KRTAP5-7	-3.26266	-2.89104	-16.8054	3.55077e-57	1.14797e-55	119.156
VSIG4	3.46573	2.60465	16.8036	3.64176e-57	1.1753e-55	119.131
GPR45	2.95446	-0.296021	16.793	4.19619e-57	1.35183e-55	118.99
YWHAZP2	5.18565	-4.59344	16.7849	4.70839e-57	1.51416e-55	118.876
RP11-89K21.1	-5.37567	-3.04261	-16.784	4.7661e-57	1.53137e-55	118.864
SYTL5	-3.30006	-0.214541	-16.7837	4.77927e-57	1.53425e-55	118.861
MEG8	-3.52494	-0.102986	-16.7816	4.92216e-57	1.57873e-55	118.831
SFTPC	-2.57874	1.56159	-16.7808	4.95458e-57	1.58766e-55	118.825
SH3PXD2A	-2.00863	2.22852	-16.7807	4.95872e-57	1.58766e-55	118.824
AC012005.3	4.69078	-6.83811	16.7722	5.59579e-57	1.79006e-55	118.704
CMTM1	2.44396	0.282707	16.7707	5.69085e-57	1.81888e-55	118.687
FAM135B	2.00182	1.88001	16.7645	6.19671e-57	1.97882e-55	118.602
EEF1A1P22	4.05986	-7.815	16.7523	7.34946e-57	2.34283e-55	118.433
RP4-671O14.6	-2.93676	-6.64651	-16.7511	7.44157e-57	2.37011e-55	118.42
MYO15B	-2.3233	4.00908	-16.7506	7.49448e-57	2.38488e-55	118.413
CTXN1	-2.77649	6.53956	-16.7436	8.24457e-57	2.62128e-55	118.318
BBOX1	2.46759	4.23683	16.7249	1.06345e-56	3.37231e-55	118.065
RGS14	-3.08591	3.311	-16.7238	1.08212e-56	3.42854e-55	118.048
RP11-862L9.3	-6.32427	2.96475	-16.7094	1.31964e-56	4.15219e-55	117.85
CEMP1	-2.14232	2.05286	-16.7087	1.32789e-56	4.17455e-55	117.844
KIF4A	2.32964	-1.83598	16.7041	1.41346e-56	4.43972e-55	117.782
RP11-510C10.2	-2.95671	-10.0404	-16.7008	1.4801e-56	4.64505e-55	117.736
RP11-613M10.8	5.46818	-5.93896	16.686	1.8164e-56	5.69065e-55	117.533
RP11-414J4.2	-3.97882	-4.83213	-16.6814	1.93553e-56	6.05866e-55	117.469
RFTN2	2.08101	3.79896	16.6749	2.1062e-56	6.5816e-55	117.385
RP11-603B24.2	5.64075	-4.74827	16.6744	2.1292e-56	6.64778e-55	117.375
RP11-47I22.1	4.92944	-1.36101	16.6735	2.15417e-56	6.71999e-55	117.363
AR	2.33369	-1.49895	16.667	2.34339e-56	7.30399e-55	117.279
TLX1NB	5.55363	-7.589	16.6661	2.38201e-56	7.41803e-55	117.263
XPOTP1	3.90646	-5.94076	16.6656	2.39854e-56	7.46312e-55	117.256
LINC01574	-5.19237	-1.21321	-16.6646	2.43338e-56	7.56506e-55	117.242
RP11-389O22.1	-6.06628	-3.93676	-16.6615	2.53919e-56	7.88729e-55	117.199
GLIS3	2.39221	1.82041	16.6596	2.59478e-56	8.05309e-55	117.178
RP11-256P1.1	-9.33179	-2.66595	-16.6549	2.7774e-56	8.60522e-55	117.11
RP11-756G20.1	4.72481	-6.02533	16.6527	2.85876e-56	8.84977e-55	117.081
TMEM191B	-3.7338	0.615798	-16.6501	2.96508e-56	9.1711e-55	117.045
GS1-257G1.1	5.38871	-2.99818	16.6456	3.15193e-56	9.73251e-55	116.984
NDST4	5.42572	-4.67356	16.633	3.73978e-56	1.15281e-54	116.814
RARRES2	-3.09069	3.45187	-16.6298	3.89836e-56	1.20068e-54	116.773
OLA1P1	3.15249	-1.92035	16.6232	4.26915e-56	1.31156e-54	116.683
LCE1E	5.41467	-6.69013	16.6215	4.37475e-56	1.34287e-54	116.658
LINC00461	2.13786	4.74881	16.5896	6.72053e-56	2.05773e-54	116.231
VTCN1	4.13576	-4.94935	16.5846	7.22293e-56	2.20969e-54	116.159
MT1G	-3.33214	5.85656	-16.5731	8.44511e-56	2.57279e-54	116.004
AC006538.4	7.2451	-5.72809	16.5594	1.0178e-55	3.09813e-54	115.818
ABHD16B	-7.68336	-7.81802	-16.5553	1.07584e-55	3.2666e-54	115.763
LINC00689	4.08549	-0.908	16.5419	1.2889e-55	3.91027e-54	115.583
MCTP2	-3.38017	-3.55233	-16.5316	1.48358e-55	4.49341e-54	115.443
SYDE2	2.38127	-1.77944	16.5137	1.88237e-55	5.69651e-54	115.207
OTOF	-3.36091	-2.37858	-16.5072	2.06294e-55	6.23777e-54	115.116
CTC-525D6.3	-3.5862	-5.25657	-16.5002	2.2693e-55	6.84472e-54	115.021
FAM201A	-3.00106	-0.784524	-16.495	2.429e-55	7.3143e-54	114.953
CACNA1H	-2.45742	1.61264	-16.4944	2.44452e-55	7.35496e-54	114.947
SPINK13	4.89223	-6.43532	16.4898	2.61301e-55	7.85543e-54	114.88
AC006042.8	4.57863	-4.03199	16.4815	2.92321e-55	8.76625e-54	114.769
LINC01010	-4.6093	-5.87852	-16.4785	3.04632e-55	9.12794e-54	114.728
RP11-586D19.2	-3.35902	-6.58857	-16.4778	3.07229e-55	9.1982e-54	114.719
GPM6A	2.30799	9.40738	16.477	3.09577e-55	9.26087e-54	114.712
RP11-236L14.2	-3.76711	-4.66379	-16.4688	3.46947e-55	1.03533e-53	114.598
ZNF625-ZNF20	2.47693	-0.196198	16.4678	3.50536e-55	1.04518e-53	114.588
RP11-204L24.2	4.64867	-2.22138	16.4678	3.51839e-55	1.04821e-53	114.585
SMOC1	2.93805	4.74245	16.4673	3.52988e-55	1.04992e-53	114.581
RP3-454B23.1	5.36873	-5.14754	16.4664	3.58732e-55	1.06526e-53	114.565
SYNJ2	-2.50126	1.53069	-16.4596	3.91461e-55	1.16151e-53	114.478
SLCO5A1	2.40854	-2.34182	16.4567	4.07312e-55	1.20755e-53	114.439
PTCHD2	2.19968	2.4088	16.4552	4.15773e-55	1.23164e-53	114.418
LSM12P1	2.574	2.12532	16.4513	4.38018e-55	1.29648e-53	114.367
LYN	2.11275	1.9293	16.4493	4.50029e-55	1.32987e-53	114.34
SSTR5	5.3069	-4.85452	16.4464	4.69939e-55	1.38645e-53	114.297
NHLH2	-3.41808	-3.13497	-16.4462	4.71318e-55	1.3894e-53	114.294
RNF185-AS1	8.68498	-1.11313	16.4391	5.18908e-55	1.52598e-53	114.198
CDCA4P1	5.4277	-1.73185	16.4347	5.50074e-55	1.61633e-53	114.14
CALML6	-3.23517	-1.54444	-16.4342	5.5391e-55	1.62629e-53	114.133
FZD10-AS1	-2.72998	-1.17704	-16.4277	6.02904e-55	1.76729e-53	114.049
RP11-45A16.4	5.42455	-4.70223	16.4231	6.43426e-55	1.88153e-53	113.984
LINC01305	-4.11025	-3.8141	-16.4217	6.55699e-55	1.91588e-53	113.965
ADAMTS7	-2.1792	-1.88641	-16.42	6.68839e-55	1.95271e-53	113.946
NKX6-1	-2.66215	-4.0322	-16.4172	6.94374e-55	2.02497e-53	113.908
PRSS51	3.29189	-0.808041	16.4139	7.2888e-55	2.1229e-53	113.86
RP11-262H14.5	3.25553	1.15212	16.411	7.57523e-55	2.20456e-53	113.822
RP11-96H17.1	-4.49403	-6.95191	-16.4031	8.42708e-55	2.44661e-53	113.716
LINC00152	-2.52705	1.98228	-16.4006	8.68429e-55	2.51727e-53	113.686
DPP6	2.12402	5.56332	16.395	9.36559e-55	2.7126e-53	113.611
CHST9	3.02137	-0.604729	16.3928	9.67045e-55	2.79867e-53	113.579
PTAFR	2.47251	-0.402012	16.3854	1.06645e-54	3.08306e-53	113.481
TAS2R10	4.28537	-3.31108	16.3856	1.067e-54	3.08306e-53	113.481
HTR2A	2.81973	3.24687	16.3803	1.14292e-54	3.29718e-53	113.413
RP11-255P5.3	-4.53639	-2.48663	-16.377	1.19923e-54	3.45415e-53	113.365
LPL	2.45712	3.69283	16.369	1.33068e-54	3.82672e-53	113.261
NRIP3	-2.88179	2.43269	-16.3672	1.36445e-54	3.92075e-53	113.236
C1orf168	4.52445	-1.36398	16.3613	1.48065e-54	4.25128e-53	113.155
ARHGAP31-AS1	5.21563	-3.65158	16.3607	1.49384e-54	4.2858e-53	113.146
RPL7AP30	2.25929	-0.896405	16.3569	1.56505e-54	4.48655e-53	113.1
SH3RF3-AS1	2.00328	-0.440391	16.3515	1.68303e-54	4.82097e-53	113.028
C1QTNF4	-2.89439	3.24141	-16.3509	1.698e-54	4.86005e-53	113.019
L1TD1	-4.17889	-8.44625	-16.3499	1.72767e-54	4.94107e-53	113.002
IQSEC3	-2.69924	4.14449	-16.3473	1.78127e-54	5.08638e-53	112.971
GPR34	2.76751	1.2516	16.3447	1.84555e-54	5.26582e-53	112.936
RP11-900F13.3	5.79359	-1.72315	16.3413	1.93971e-54	5.53015e-53	112.886
QRFPR	4.29551	-2.23507	16.3378	2.03387e-54	5.78501e-53	112.839
CASC4P1	4.05078	-7.12693	16.3351	2.10691e-54	5.9881e-53	112.804
DFNB31	-2.05151	1.91773	-16.3325	2.17369e-54	6.17309e-53	112.773
EEF1A1P5	2.24732	5.22327	16.3316	2.20109e-54	6.24601e-53	112.761
FXYD2	2.76401	-0.32087	16.3303	2.2391e-54	6.34774e-53	112.744
RP11-731C17.1	4.16552	-7.90691	16.3306	2.24042e-54	6.34774e-53	112.743
FKBP1B	-2.34832	4.23722	-16.3286	2.29241e-54	6.49e-53	112.72
FAM84B	2.17159	2.678	16.3276	2.32162e-54	6.56759e-53	112.708
PLA2G4F	-3.85234	-6.91482	-16.326	2.38119e-54	6.73087e-53	112.683
LRRTM3	2.24004	2.36751	16.3221	2.50051e-54	7.0572e-53	112.634
RP11-17E3.1	-5.03972	-2.27861	-16.3223	2.50549e-54	7.06581e-53	112.632
RP11-109G23.1	7.43943	-4.61876	16.3197	2.59377e-54	7.30909e-53	112.597
ADCY10P1	-2.11074	-0.249557	-16.313	2.82445e-54	7.95299e-53	112.513
ADAMTSL1	2.51968	-1.21417	16.3072	3.05684e-54	8.60071e-53	112.434
LL0XNC01-116E7.4	4.92067	-5.19069	16.306	3.1178e-54	8.76545e-53	112.414
HNRNPA3P11	4.61266	-6.93192	16.3041	3.19788e-54	8.98364e-53	112.389
RP11-624L12.1	4.63519	-7.13225	16.2833	4.23035e-54	1.18637e-52	112.111
RP11-104H15.7	5.51924	-2.76978	16.2832	4.23285e-54	1.18637e-52	112.11
LRRC37A7P	3.69531	-4.67564	16.2739	4.79716e-54	1.34247e-52	111.986
RP11-982M15.8	-3.35618	-7.50177	-16.2689	5.13314e-54	1.43539e-52	111.919
KRT81	-3.91475	-3.17794	-16.2602	5.76508e-54	1.61086e-52	111.803
UBE2SP2	6.46428	-2.23105	16.2584	5.90403e-54	1.64842e-52	111.779
KCNIP4-IT1	-3.05873	-7.17712	-16.2571	6.0005e-54	1.67408e-52	111.763
RPL3P9	3.16881	-8.46459	16.2533	6.31745e-54	1.75846e-52	111.712
SIX4	2.16858	-1.1329	16.2447	7.07301e-54	1.96577e-52	111.6
SLC28A3	4.36441	-5.21102	16.2447	7.09447e-54	1.97023e-52	111.597
VIPR2	2.92835	1.68355	16.2389	7.64814e-54	2.11915e-52	111.522
PHYHIPL	2.16326	6.39481	16.2369	7.85009e-54	2.17345e-52	111.496
PHLDA2	-3.58759	-1.66971	-16.2363	7.94799e-54	2.19888e-52	111.484
SNHG24	-3.34704	-2.16565	-16.23	8.6491e-54	2.38923e-52	111.4
RP11-109P14.10	-8.74681	-4.46517	-16.2294	8.71589e-54	2.40585e-52	111.392
RP1-102K2.9	3.34221	-1.92835	16.2251	9.2336e-54	2.54682e-52	111.335
TBCAP1	6.13909	-2.89544	16.2091	1.14311e-53	3.14341e-52	111.122
FOLR2	2.62563	2.05237	16.2079	1.1577e-53	3.17875e-52	111.11
CALY	-3.53063	4.79807	-16.2071	1.17424e-53	3.21932e-52	111.096
INF2	-2.21606	4.50943	-16.2057	1.19199e-53	3.26551e-52	111.081
LA16c-380A1.2	2.73643	0.274547	16.2036	1.2259e-53	3.35337e-52	111.053
CX3CR1	3.29558	1.72569	16.202	1.25745e-53	3.4371e-52	111.027
RP1-167F1.2	4.30367	-1.41201	16.198	1.32655e-53	3.62327e-52	110.974
GS1-309P15.4	3.40722	-8.45146	16.1941	1.39882e-53	3.81208e-52	110.921
TMPOP1	3.86998	-7.5059	16.1803	1.68236e-53	4.57792e-52	110.738
CTD-2314G24.2	-3.22451	-9.83283	-16.1677	1.98966e-53	5.40203e-52	110.571
CLEC4F	4.51481	-3.80003	16.1616	2.16019e-53	5.86067e-52	110.489
RP11-573G6.6	-2.99192	-0.675957	-16.1553	2.3427e-53	6.34638e-52	110.409
SIGLEC8	2.83412	0.320846	16.1492	2.54143e-53	6.87962e-52	110.328
RP11-730N24.1	2.63934	-8.76207	16.149	2.54651e-53	6.88353e-52	110.326
PLIN4	-2.3882	-0.0297087	-16.1414	2.81834e-53	7.58973e-52	110.225
CTC-529I10.1	-2.83622	0.691534	-16.1385	2.93029e-53	7.88539e-52	110.186
FBXW11P1	2.35857	-1.98327	16.1346	3.08369e-53	8.29205e-52	110.135
CKS1BP3	6.88992	-5.6907	16.1302	3.2831e-53	8.81527e-52	110.073
AF127936.5	4.90449	-2.73314	16.1272	3.41962e-53	9.16831e-52	110.032
RP11-100E13.1	-6.96877	-5.34372	-16.1237	3.58025e-53	9.59191e-52	109.987
BTBD8	2.56216	-1.2805	16.122	3.651e-53	9.77427e-52	109.967
FIBIN	2.49347	3.58126	16.1213	3.68525e-53	9.85872e-52	109.958
TBR1	4.3877	4.20027	16.1187	3.83064e-53	1.02402e-51	109.92
RPL23AP61	4.18719	-8.11319	16.1048	4.60727e-53	1.22892e-51	109.736
AP002856.7	-4.9342	-10.9155	-16.1044	4.63252e-53	1.23475e-51	109.731
PAQR6	-2.70383	6.07845	-16.1011	4.82111e-53	1.28314e-51	109.691
CTD-2647L4.5	-8.35057	-4.39051	-16.0967	5.13167e-53	1.3648e-51	109.629
H19	-3.66414	-0.623509	-16.0907	5.56455e-53	1.47777e-51	109.548
PDZD7	-2.27163	1.46249	-16.0866	5.85149e-53	1.55171e-51	109.498
RP11-75A9.3	3.59678	-5.20292	16.0859	5.92943e-53	1.57123e-51	109.485
ARSJ	2.4872	-0.704712	16.0801	6.38089e-53	1.68964e-51	109.412
RP11-626E13.1	5.85822	-3.35286	16.0772	6.66084e-53	1.76249e-51	109.369
DES	-4.50997	0.224898	-16.0765	6.72205e-53	1.77739e-51	109.36
CABP7	-2.38294	-0.0496228	-16.0614	8.18225e-53	2.15722e-51	109.165
CTB-167B5.1	5.80431	-5.10065	16.0614	8.21586e-53	2.16452e-51	109.161
RP5-1052I5.2	5.52597	-6.49532	16.0549	8.95814e-53	2.35667e-51	109.075
RP11-588G21.1	4.73981	-5.98244	16.0488	9.71762e-53	2.55278e-51	108.994
TMX2-CTNND1	5.78431	-1.66763	16.0457	1.01258e-52	2.65617e-51	108.953
RP11-574O7.1	5.52904	-5.59822	16.0453	1.0175e-52	2.66718e-51	108.948
NOS1	-2.63154	-0.635401	-16.0435	1.03908e-52	2.72179e-51	108.927
AC012354.6	-3.9003	-8.16837	-16.0404	1.0869e-52	2.84498e-51	108.882
TIGD4	2.06491	-1.6345	16.0397	1.09293e-52	2.85871e-51	108.877
SUMO1P4	6.90786	-6.04059	16.0357	1.15635e-52	3.02026e-51	108.821
FAR2P1	-4.61184	-5.70918	-16.0325	1.20757e-52	3.14953e-51	108.778
PACRG-AS1	-3.46768	-4.34302	-16.0304	1.24093e-52	3.23423e-51	108.751
RP11-553K23.2	3.03093	-1.11072	16.0244	1.34191e-52	3.49491e-51	108.673
FAM64A	3.40564	-1.72638	16.0231	1.36836e-52	3.55871e-51	108.653
AC011239.2	-3.31561	-3.72404	-16.0216	1.39592e-52	3.62523e-51	108.634
RP11-212P7.3	5.96708	-2.772	16.0165	1.49365e-52	3.87351e-51	108.566
GLI2	2.18972	-0.374705	16.0156	1.50535e-52	3.90107e-51	108.558
HIF1A-AS1	3.97774	-2.0893	16.013	1.56344e-52	4.04872e-51	108.521
KCNJ2-AS1	-2.03405	-2.24293	-16.0081	1.66348e-52	4.30472e-51	108.459
RPS2P55	3.92033	-2.66041	16.0082	1.66658e-52	4.30969e-51	108.457
SEMA5B	2.15128	3.7193	15.9989	1.87989e-52	4.85785e-51	108.337
THNSL2	-2.87582	1.79524	-15.9989	1.88179e-52	4.85932e-51	108.336
RP11-565P22.2	5.2556	-7.26903	15.9969	1.93753e-52	4.9997e-51	108.307
XRCC6P2	2.94419	-3.34186	15.9945	1.99553e-52	5.14573e-51	108.278
AC021188.4	3.09777	-0.78944	15.9937	2.01859e-52	5.20151e-51	108.267
A1BG	-2.22197	2.69157	-15.9859	2.23294e-52	5.74979e-51	108.166
LGALS7B	-6.6311	-4.75819	-15.986	2.23856e-52	5.76019e-51	108.164
GLYCTK-AS1	4.81425	-3.13804	15.9815	2.37672e-52	6.10707e-51	108.104
ADRA2B	-2.65625	-3.27106	-15.9701	2.75521e-52	7.05472e-51	107.957
OGFRL1	2.00476	4.33379	15.9697	2.76886e-52	7.08469e-51	107.952
PIK3CG	2.95187	-2.63278	15.9693	2.78919e-52	7.13171e-51	107.945
ME1	-2.18472	2.53364	-15.9668	2.87827e-52	7.35433e-51	107.914
OR4N4	4.19712	-8.28479	15.9608	3.1258e-52	7.9756e-51	107.832
AC103563.9	-5.56084	-5.4031	-15.9416	4.03118e-52	1.0257e-50	107.579
OR7E29P	2.97551	-1.43015	15.9355	4.36712e-52	1.1104e-50	107.499
LIN28B	-3.66372	-5.58253	-15.925	5.02167e-52	1.27505e-50	107.36
ANKRD20A8P	-3.74543	-8.51096	-15.9208	5.31487e-52	1.34856e-50	107.304
HPGDS	2.89347	-0.458134	15.9203	5.33849e-52	1.35361e-50	107.299
CYP4F29P	-4.89673	-1.29697	-15.9185	5.47375e-52	1.38694e-50	107.275
COL18A1	-2.04464	2.45166	-15.9133	5.84275e-52	1.47941e-50	107.21
GAFA3	5.69557	-4.09828	15.9128	5.90513e-52	1.49416e-50	107.199
AC007192.6	-3.69985	4.65328	-15.9037	6.66457e-52	1.68515e-50	107.079
STEAP3-AS1	2.06594	-2.46461	15.901	6.87736e-52	1.73775e-50	107.048
LYPLA1P3	5.44063	-6.00191	15.8966	7.32e-52	1.84703e-50	106.986
INS	-5.66745	-9.51989	-15.8905	7.92843e-52	1.99917e-50	106.906
LINC00577	-5.14377	-3.54703	-15.8898	7.9992e-52	2.01562e-50	106.897
FHDC1	2.27753	-0.678969	15.883	8.72583e-52	2.19416e-50	106.811
TMEM119	2.65117	1.17059	15.878	9.31809e-52	2.33825e-50	106.746
ADCY8	2.29115	2.80391	15.8735	9.89032e-52	2.47843e-50	106.686
MATK	-2.05188	4.06749	-15.868	1.06325e-51	2.66258e-50	106.614
FFAR1	-4.30084	-5.26297	-15.8682	1.06515e-51	2.66551e-50	106.613
KRT18	-2.97533	-2.49772	-15.8624	1.14824e-51	2.87146e-50	106.538
AP002530.2	5.70388	-3.08199	15.8555	1.25918e-51	3.14674e-50	106.446
SLURP1	-5.49558	-7.95751	-15.8526	1.30853e-51	3.26441e-50	106.408
MT1H	-5.1572	1.02392	-15.8502	1.35084e-51	3.36427e-50	106.376
RP11-419J16.1	5.29454	-7.7545	15.8474	1.40159e-51	3.48588e-50	106.34
RNF144A-AS1	-3.32542	0.761752	-15.8456	1.43564e-51	3.56814e-50	106.316
ESX1	4.74226	-8.18042	15.844	1.46641e-51	3.64214e-50	106.295
NCALD	2.25534	5.94233	15.8429	1.48171e-51	3.67762e-50	106.284
RAB31	2.09178	6.21162	15.8427	1.486e-51	3.68576e-50	106.281
PPP1R1C	2.30742	0.221208	15.8417	1.50601e-51	3.73286e-50	106.268
RP11-431N15.2	4.97409	-7.1714	15.8398	1.54877e-51	3.83364e-50	106.24
RP11-391L3.1	7.42819	-2.78287	15.8377	1.5933e-51	3.94118e-50	106.212
PPAP2C	-2.56783	1.41721	-15.8355	1.63423e-51	4.03694e-50	106.187
AF064858.7	-3.60837	-3.01658	-15.8279	1.81213e-51	4.47034e-50	106.084
AC003973.3	-3.69689	-3.33634	-15.8271	1.83046e-51	4.5125e-50	106.074
RBP1	-2.8424	4.02955	-15.8169	2.08896e-51	5.13238e-50	105.943
SPTBN5	-2.07663	-1.29614	-15.8133	2.18908e-51	5.37474e-50	105.896
SRGAP2D	5.03832	0.742232	15.8095	2.30951e-51	5.659e-50	105.843
AP000473.8	2.03672	0.725127	15.808	2.34829e-51	5.75016e-50	105.826
RPL9P32	4.70691	-6.45537	15.8072	2.38097e-51	5.82626e-50	105.813
ZACN	-3.74063	2.81697	-15.8066	2.39987e-51	5.86857e-50	105.805
RP11-508O18.1	4.91283	-6.90908	15.7972	2.71597e-51	6.63266e-50	105.682
RGS8	-3.20308	-0.499783	-15.7946	2.80954e-51	6.85656e-50	105.648
KCNH1	3.0847	0.74541	15.7937	2.84067e-51	6.92789e-50	105.637
RPL34-AS1	2.81672	-2.47867	15.7859	3.14518e-51	7.66541e-50	105.536
PNMT	-3.05919	1.73158	-15.7774	3.51958e-51	8.57214e-50	105.424
VWA5B2	-2.20871	3.90912	-15.7532	4.8316e-51	1.17285e-49	105.109
HS3ST5	-2.50694	-0.437766	-15.7515	4.93554e-51	1.19648e-49	105.088
FAM169B	-3.50774	-7.75988	-15.7394	5.80973e-51	1.40373e-49	104.926
ADAMTS14	-2.95508	-2.40306	-15.732	6.39633e-51	1.54138e-49	104.83
CTD-2291D10.4	5.53296	-4.52804	15.7233	7.17669e-51	1.72715e-49	104.716
CALB2	-3.24962	2.98851	-15.7228	7.22393e-51	1.73622e-49	104.709
BFSP1	-2.23213	-0.436014	-15.7195	7.52286e-51	1.80569e-49	104.669
KCNIP3	2.15924	5.48165	15.7146	8.02201e-51	1.92423e-49	104.605
RP1-159M24.1	4.10396	-6.12898	15.7143	8.07359e-51	1.93532e-49	104.598
RP11-266O8.1	3.00523	-2.20938	15.7113	8.39259e-51	2.01047e-49	104.56
STARD4-AS1	2.18631	-0.0482002	15.7051	9.07998e-51	2.17228e-49	104.482
RP11-95F22.1	5.63924	-2.22113	15.6999	9.75598e-51	2.33094e-49	104.41
HSD17B3	-2.70056	-0.356854	-15.6982	9.94915e-51	2.37554e-49	104.391
CTC-523E23.4	4.56508	-6.86787	15.6938	1.05679e-50	2.52163e-49	104.331
RP11-97O12.5	-6.22105	-0.98018	-15.691	1.09662e-50	2.61324e-49	104.294
CDK18	-2.61337	3.89923	-15.6895	1.11426e-50	2.65354e-49	104.278
TGIF2-C20orf24	6.94992	-4.80798	15.6892	1.1223e-50	2.67093e-49	104.271
PSAPL1	-3.42654	-8.29845	-15.6798	1.26963e-50	3.01565e-49	104.148
RN7SKP70	7.13155	-0.00502731	15.6796	1.27312e-50	3.02199e-49	104.146
RP11-474G23.2	8.29339	-4.29315	15.6622	1.5988e-50	3.78025e-49	103.919
DAPK1	2.01111	4.20948	15.6483	1.91244e-50	4.51599e-49	103.741
ZDHHC22	2.32633	4.63333	15.6455	1.98326e-50	4.68017e-49	103.705
RP5-991B18.2	5.69391	-6.81798	15.641	2.10974e-50	4.97543e-49	103.643
SPAG17	-4.70472	-3.11022	-15.6408	2.11526e-50	4.98523e-49	103.641
CTD-2020K17.1	-2.06022	0.926982	-15.6385	2.17313e-50	5.11831e-49	103.614
FEV	-4.76341	-5.19153	-15.6383	2.18578e-50	5.14476e-49	103.608
LINC00486	-4.68817	-7.88405	-15.6381	2.19251e-50	5.15728e-49	103.605
RP11-353N14.4	-3.44047	-3.10638	-15.633	2.34469e-50	5.51169e-49	103.538
RPL37P6	5.35846	-5.56577	15.6234	2.65583e-50	6.227e-49	103.414
RP11-56G10.2	9.46948	-2.41593	15.6199	2.78189e-50	6.51001e-49	103.368
COL9A1	-2.84288	1.47613	-15.6153	2.94619e-50	6.88566e-49	103.311
MED28P8	-5.11884	-4.46655	-15.6124	3.06576e-50	7.16052e-49	103.272
FOLH1	-3.02156	0.701658	-15.6028	3.47498e-50	8.11111e-49	103.147
RP11-728F11.4	3.36774	0.972358	15.5918	4.01411e-50	9.35153e-49	103.004
XXbac-B33L19.6	4.18017	-7.79876	15.5889	4.17244e-50	9.70797e-49	102.965
MUC6	-3.27531	-3.96316	-15.5837	4.46421e-50	1.03736e-48	102.898
NAP1L1P1	2.86122	-1.97342	15.5825	4.52168e-50	1.05004e-48	102.885
MTHFD2	2.56048	2.39559	15.5823	4.53155e-50	1.05104e-48	102.883
ABAT	2.05587	7.0049	15.5788	4.74288e-50	1.09931e-48	102.838
TTC39A	-2.5051	-0.565912	-15.5746	5.01003e-50	1.16049e-48	102.783
KCNB1	2.22265	3.55506	15.5722	5.16686e-50	1.19606e-48	102.753
NCR3LG1	2.34188	0.351237	15.5664	5.57454e-50	1.28798e-48	102.677
GCHFR	-2.10445	2.02048	-15.5655	5.63735e-50	1.30166e-48	102.666
PRSS12	2.56929	0.180619	15.5654	5.6483e-50	1.30337e-48	102.664
RP11-319E12.2	4.53447	-7.54895	15.5585	6.20212e-50	1.42935e-48	102.571
CHRNA7	2.95941	1.36572	15.5582	6.21664e-50	1.43179e-48	102.569
CD68	3.03448	2.51164	15.5559	6.40987e-50	1.47536e-48	102.538
CASC6	4.44506	-7.94324	15.5532	6.64581e-50	1.52678e-48	102.502
RP11-728E14.3	-3.30273	-4.72997	-15.5501	6.91523e-50	1.58767e-48	102.463
PAPL	-4.00777	-3.73226	-15.5473	7.17739e-50	1.64682e-48	102.426
TNFSF8	3.59811	-3.53053	15.5432	7.56713e-50	1.73406e-48	102.373
MKI67	4.11832	-4.55958	15.5425	7.63697e-50	1.74897e-48	102.364
LPAR4	2.8521	-1.50075	15.5419	7.68159e-50	1.75808e-48	102.358
LINC00391	3.62197	-1.74598	15.5385	8.04153e-50	1.83815e-48	102.313
CTB-41I6.1	5.17981	-7.17694	15.5328	8.66497e-50	1.97942e-48	102.239
TMEM74B	-2.05254	2.46984	-15.5276	9.23779e-50	2.10895e-48	102.175
KISS1R	-4.52361	-3.32042	-15.5271	9.33126e-50	2.12895e-48	102.165
TLR7	2.69141	-1.87104	15.5239	9.69725e-50	2.21107e-48	102.127
RP4-738P15.6	-7.629	1.59334	-15.524	9.72011e-50	2.2149e-48	102.124
RP11-803D5.1	-3.67942	-7.275	-15.5237	9.75945e-50	2.22247e-48	102.12
MOBP	-3.977	4.31224	-15.5235	9.78092e-50	2.22597e-48	102.118
AC073636.1	4.79009	-7.44339	15.5198	1.0265e-49	2.33031e-48	102.07
CRYBB1	2.70069	-0.138097	15.519	1.03386e-49	2.34557e-48	102.063
RP5-1050D4.5	2.97338	0.222181	15.5134	1.11429e-49	2.52647e-48	101.989
CTD-2049O4.1	-2.99771	-1.00795	-15.5109	1.1517e-49	2.60966e-48	101.956
RP11-151F5.2	4.72271	-6.77824	15.4938	1.44044e-49	3.25784e-48	101.733
AP000282.3	5.28913	-6.14616	15.4871	1.56964e-49	3.54346e-48	101.648
RP11-379L18.1	5.37196	-1.39367	15.4788	1.74886e-49	3.94315e-48	101.54
SRPX	2.39318	1.5477	15.4761	1.80687e-49	4.07145e-48	101.508
AP000275.65	2.16483	1.70903	15.4725	1.89196e-49	4.26053e-48	101.462
CCDC144B	2.5085	-0.650652	15.469	1.98127e-49	4.45615e-48	101.416
CTD-3193O13.14	-8.4263	-5.9328	-15.4671	2.03659e-49	4.57775e-48	101.389
CR2	-3.91577	-8.1422	-15.4643	2.11317e-49	4.74695e-48	101.352
CH17-140K24.5	6.04671	-5.0601	15.4611	2.20257e-49	4.94472e-48	101.311
WLS	2.04763	5.75986	15.4583	2.27487e-49	5.1039e-48	101.279
RP11-1136G4.2	-5.48433	-9.33665	-15.4565	2.3373e-49	5.2375e-48	101.252
RP4-665J23.1	-2.30902	2.16085	-15.4551	2.37268e-49	5.31353e-48	101.237
AP1G2	-2.18344	5.05908	-15.4522	2.46297e-49	5.51232e-48	101.2
GOLT1A	-3.72402	-0.0734291	-15.4434	2.7701e-49	6.19592e-48	101.083
AC009166.5	5.15399	-6.5953	15.4405	2.87819e-49	6.42585e-48	101.045
GBP7	4.22973	-5.43795	15.4399	2.89732e-49	6.46459e-48	101.038
AC011288.2	5.63054	-0.436313	15.434	3.12968e-49	6.96173e-48	100.962
PAPOLB	-3.21628	-8.50054	-15.4316	3.22689e-49	7.17358e-48	100.931
RP11-283I3.2	-4.40127	-2.20349	-15.4164	3.9319e-49	8.7302e-48	100.735
LINC01351	2.42386	2.93482	15.4061	4.48107e-49	9.91934e-48	100.605
MKX	2.86987	0.519345	15.403	4.66837e-49	1.03151e-47	100.564
PWAR5	2.04181	0.405279	15.395	5.17068e-49	1.14112e-47	100.463
RP11-694I15.7	2.10013	-1.42696	15.3945	5.20538e-49	1.14739e-47	100.456
CTD-3222D19.9	2.94267	-4.40916	15.3842	5.95984e-49	1.3121e-47	100.321
POPDC3	-2.54788	1.56867	-15.3828	6.05126e-49	1.33062e-47	100.306
DDIAS	2.23127	-2.53835	15.3806	6.22638e-49	1.36792e-47	100.278
PTGER1	-3.73534	-4.95139	-15.3653	7.61295e-49	1.66798e-47	100.078
RP1-206D15.6	3.63527	-1.22057	15.3649	7.66177e-49	1.67767e-47	100.072
RP11-290O12.2	5.78172	-5.03237	15.3644	7.70626e-49	1.6864e-47	100.066
TPMTP1	5.0117	-3.87199	15.3624	7.91276e-49	1.73055e-47	100.04
ABHD12B	-2.56012	1.25143	-15.36	8.13048e-49	1.7771e-47	100.013
GRPR	4.08973	-3.85753	15.3561	8.58113e-49	1.87335e-47	99.9589
RTKN2	2.34121	-1.33823	15.3545	8.73285e-49	1.90533e-47	99.9415
AP000560.3	3.73838	-4.12042	15.3494	9.34969e-49	2.03747e-47	99.8736
NKX2-1-AS1	-3.67101	-8.82473	-15.3435	1.01009e-48	2.19985e-47	99.7968
GRID2IP	2.08454	-2.23095	15.3424	1.02057e-48	2.22002e-47	99.7865
RIMKLBP2	4.71922	-3.52288	15.3384	1.07773e-48	2.34298e-47	99.7324
FOXA1	-4.81194	-10.0152	-15.3356	1.11785e-48	2.42873e-47	99.696
RP11-308D13.3	4.6205	-7.38351	15.329	1.2169e-48	2.64237e-47	99.6116
TMEM151A	-2.3727	3.22947	-15.325	1.27857e-48	2.77298e-47	99.5624
PCDHGC5	2.73305	3.19406	15.3217	1.33443e-48	2.8924e-47	99.5199
CTD-2073O6.1	3.35874	-8.49048	15.3121	1.51468e-48	3.27726e-47	99.394
AC005037.3	5.1736	-5.24147	15.3105	1.54674e-48	3.34462e-47	99.3732
RP11-109P6.2	5.40707	-6.72335	15.3036	1.69065e-48	3.65366e-47	99.2847
GIPR	-2.82616	-2.3173	-15.2981	1.81111e-48	3.91165e-47	99.2163
NAT8	4.45219	-3.33026	15.2965	1.85185e-48	3.99728e-47	99.1942
SPTLC3	2.02056	-1.32774	15.2949	1.88401e-48	4.06429e-47	99.177
DDX4	-3.15023	-4.50163	-15.2937	1.92009e-48	4.13722e-47	99.1582
CTB-129P6.7	2.3943	-3.393	15.2924	1.94596e-48	4.19049e-47	99.1449
RLTPR	-2.53565	3.88962	-15.2807	2.26271e-48	4.86396e-47	98.9949
ADRA1B	2.63669	3.29079	15.2673	2.69108e-48	5.76439e-47	98.8226
CH507-145C22.4	4.89613	-6.71325	15.2668	2.71664e-48	5.81571e-47	98.8132
CYP4A11	-3.82224	-4.58144	-15.263	2.84943e-48	6.09642e-47	98.7658
G6PC	3.81255	-7.37522	15.2605	2.94434e-48	6.29207e-47	98.7332
GPR75-ASB3	2.16834	2.04229	15.257	3.07137e-48	6.55202e-47	98.6912
RP11-65M17.1	3.6824	-7.90336	15.2561	3.11565e-48	6.63871e-47	98.677
MAMDC2	2.46074	-1.21476	15.2545	3.17004e-48	6.75064e-47	98.6597
AC009487.6	2.82748	-4.36939	15.2526	3.25595e-48	6.92954e-47	98.6332
UXT-AS1	2.75947	-1.86536	15.2434	3.66143e-48	7.78797e-47	98.5165
RP11-698N11.2	5.38244	-4.08343	15.2421	3.73086e-48	7.93102e-47	98.4978
STK31	-2.48404	-3.63036	-15.2385	3.89753e-48	8.2805e-47	98.4543
TNF	4.59357	-3.9437	15.2385	3.90698e-48	8.29572e-47	98.452
RP4-555D20.2	-2.58121	1.49162	-15.2361	4.01744e-48	8.51537e-47	98.4242
FAM153B	-3.97804	2.60759	-15.2337	4.15387e-48	8.79945e-47	98.391
CTD-2383M3.1	3.10768	-2.78552	15.232	4.24699e-48	8.99147e-47	98.369
LOXL1-AS1	-3.11041	-2.12868	-15.2241	4.7007e-48	9.93473e-47	98.2681
PLTP	2.14227	6.12622	15.2062	5.89694e-48	1.24319e-46	98.0427
AC010649.1	-8.54675	-2.05976	-15.197	6.66236e-48	1.40318e-46	97.9214
MYH7	2.31453	1.48733	15.1933	6.96264e-48	1.46557e-46	97.8775
LHFPL3	2.62552	3.2876	15.1899	7.27608e-48	1.53066e-46	97.8337
CTC-203F4.2	-2.03534	0.47865	-15.1848	7.76177e-48	1.6319e-46	97.7695
RP11-677M14.5	2.31285	1.03512	15.1805	8.20611e-48	1.72261e-46	97.7142
DLGAP5	4.32795	-6.12346	15.1807	8.2074e-48	1.72261e-46	97.714
CRISP3	-4.59716	-8.15303	-15.1634	1.02452e-47	2.1466e-46	97.4936
RP11-182J23.1	3.55393	-1.0513	15.1596	1.07562e-47	2.24979e-46	97.4452
RP11-435I10.3	5.00137	-6.25269	15.1522	1.18353e-47	2.47185e-46	97.3501
SDR42E1	-3.61661	-9.8952	-15.1521	1.18383e-47	2.47185e-46	97.3499
RP1-130H16.18	3.03643	-0.388689	15.1514	1.19498e-47	2.49371e-46	97.3406
ZBTB16	2.18434	3.41233	15.1458	1.28053e-47	2.66765e-46	97.2718
UG0898H09	2.44687	4.04963	15.142	1.34441e-47	2.79594e-46	97.2234
TTLL7-IT1	-3.71385	-8.26143	-15.137	1.43632e-47	2.98368e-46	97.1577
RP11-178L8.8	-8.58075	-7.09219	-15.1324	1.5234e-47	3.16276e-46	97.0992
MAL	-3.20644	4.10687	-15.13	1.57144e-47	3.26065e-46	97.0683
CTD-2342N23.1	-3.58857	-9.46739	-15.1264	1.64607e-47	3.41162e-46	97.0222
CALML3	-3.77009	-5.17483	-15.1236	1.70654e-47	3.53292e-46	96.9863
TRBV7-1	5.92537	-6.09209	15.1196	1.79518e-47	3.71222e-46	96.936
FAT2	-2.84907	-5.36518	-15.1091	2.04975e-47	4.23382e-46	96.8042
CH507-513H4.6	-2.85665	10.0934	-15.108	2.0794e-47	4.28778e-46	96.7899
SHISA2	-2.48868	-3.0628	-15.1049	2.15986e-47	4.44614e-46	96.7521
RP11-44N21.1	-2.85301	0.290934	-15.1047	2.17032e-47	4.46332e-46	96.7473
NOX3	4.15453	-6.06778	15.1048	2.17066e-47	4.46332e-46	96.7472
ENPP2	-2.36978	2.81667	-15.1035	2.20007e-47	4.52125e-46	96.7338
DYNLT3	-2.06427	3.84953	-15.1006	2.28333e-47	4.68971e-46	96.6969
IDI2-AS1	-2.46882	0.749136	-15.1003	2.29101e-47	4.70283e-46	96.6935
CSF1R	2.40734	3.42729	15.0967	2.39796e-47	4.91683e-46	96.6482
RP3-340B19.5	5.19714	-7.55314	15.096	2.42839e-47	4.97643e-46	96.6357
RP11-158M2.3	2.29879	0.811594	15.0957	2.42983e-47	4.97658e-46	96.635
DNM3OS	-2.96688	-6.33481	-15.0946	2.47029e-47	5.0566e-46	96.6186
AC005481.5	-3.19226	-6.66615	-15.0941	2.48862e-47	5.09126e-46	96.6113
RP11-374M1.2	2.20969	-0.0132307	15.0934	2.50313e-47	5.11808e-46	96.6055
CH507-513H4.4	-2.85481	10.0947	-15.0908	2.58992e-47	5.28959e-46	96.5716
CH507-513H4.3	-2.85481	10.0947	-15.0908	2.58992e-47	5.28959e-46	96.5716
TPX2	2.08201	-0.113071	15.0688	3.42665e-47	6.97505e-46	96.2933
RFPL4B	4.18277	-6.80602	15.0685	3.44935e-47	7.01733e-46	96.2868
FAM180A	4.04808	-3.49399	15.0652	3.5966e-47	7.31282e-46	96.2452
S100A13	-2.42035	6.25267	-15.0631	3.68468e-47	7.48774e-46	96.2211
RP11-48B3.3	3.15083	-5.46659	15.059	3.89236e-47	7.89655e-46	96.1667
SYCP3	-3.01568	-2.42559	-15.057	3.99339e-47	8.09251e-46	96.1412
NOP56P3	5.6618	-6.89545	15.0554	4.07793e-47	8.25922e-46	96.1204
CTD-2001J20.1	-2.69534	-2.26773	-15.0533	4.1781e-47	8.44803e-46	96.0962
LDB3	-2.47071	0.447937	-15.0505	4.3284e-47	8.74707e-46	96.0611
FERMT1	2.53461	1.02479	15.0408	4.89535e-47	9.86543e-46	95.9387
MAFA	-4.22832	-6.43247	-15.0333	5.40224e-47	1.08569e-45	95.8408
LPAR3	-4.13615	-1.39484	-15.0321	5.48357e-47	1.10143e-45	95.826
DPP4	3.01117	-0.879575	15.0297	5.65471e-47	1.13518e-45	95.7954
MIR143HG	-2.54131	-1.90558	-15.0207	6.32606e-47	1.26925e-45	95.6839
AC007238.1	2.24218	-2.88846	15.0188	6.4801e-47	1.29873e-45	95.66
RP11-19P22.8	-2.4454	2.33166	-15.0185	6.50288e-47	1.30258e-45	95.6565
GP2	-6.56629	-7.63131	-15.0172	6.62853e-47	1.32556e-45	95.6375
UBD	4.20657	-2.68434	15.0154	6.79035e-47	1.35718e-45	95.6135
RTN4RL2	2.31698	4.26254	15.014	6.88716e-47	1.37577e-45	95.5994
MYOD1	5.20602	-5.71674	14.9958	8.71335e-47	1.73486e-45	95.3656
ETF1P1	3.75198	-7.02184	14.9944	8.86463e-47	1.76402e-45	95.3485
LRRC2	2.63366	1.39593	14.9897	9.38917e-47	1.86738e-45	95.2914
RP11-953B20.1	-4.28404	-3.25457	-14.9861	9.8525e-47	1.95846e-45	95.2435
TMEM252	4.46747	-5.62515	14.9693	1.21913e-46	2.41545e-45	95.0318
TP53TG5	-2.34407	-0.510136	-14.9686	1.22691e-46	2.42955e-45	95.0254
RP11-69E11.4	-2.20578	2.86723	-14.9473	1.60728e-46	3.17241e-45	94.757
PRL	-6.1574	-6.93409	-14.9453	1.6537e-46	3.26227e-45	94.7287
RP11-212P7.1	5.20388	-4.13213	14.9435	1.69331e-46	3.33861e-45	94.7052
RP11-179A16.1	4.9669	-4.02822	14.9381	1.81205e-46	3.565e-45	94.6378
RP11-296E7.1	2.23267	-4.11057	14.9375	1.82042e-46	3.57955e-45	94.6332
RP11-234B24.5	4.03219	-7.48364	14.9292	2.02853e-46	3.98015e-45	94.5257
RP4-785G19.2	4.54081	-1.92541	14.9272	2.07994e-46	4.07884e-45	94.5008
AC098823.3	3.63951	-4.60279	14.9154	2.41614e-46	4.7305e-45	94.3518
SEMA3F	-2.04914	0.36178	-14.9144	2.44105e-46	4.77669e-45	94.3416
CTD-2008L17.2	3.3977	-5.14987	14.9135	2.47437e-46	4.8393e-45	94.3282
C4orf48	-2.27333	4.13623	-14.909	2.61385e-46	5.1066e-45	94.2736
RP1-20B21.4	-8.91082	-7.93014	-14.8878	3.42714e-46	6.6776e-45	94.0044
RP11-419K12.1	3.96296	-8.39033	14.8848	3.56118e-46	6.93508e-45	93.9663
CTA-363E19.2	2.30663	-0.753775	14.883	3.63207e-46	7.06935e-45	93.9466
LHX3	4.39049	-7.08915	14.8765	3.9565e-46	7.69258e-45	93.8616
AC053503.11	5.47957	-2.06563	14.8751	4.02522e-46	7.81785e-45	93.8445
RP11-420L9.2	5.89375	-4.2187	14.8703	4.2805e-46	8.30924e-45	93.7834
FAM207BP	4.91011	-3.44016	14.8593	4.91883e-46	9.5331e-45	93.6452
BIVM-ERCC5	6.15353	-2.38443	14.8542	5.24521e-46	1.01603e-44	93.5814
AC004854.4	7.41938	-4.99272	14.8531	5.31586e-46	1.02916e-44	93.5681
PES1P2	3.85516	-5.77968	14.8516	5.41876e-46	1.04853e-44	93.549
CYBB	2.38201	1.01463	14.847	5.73046e-46	1.10825e-44	93.4934
RP11-161H23.9	3.35268	-7.26814	14.8444	5.93262e-46	1.14613e-44	93.459
MTND1P23	-3.48314	3.64733	-14.8368	6.5351e-46	1.26119e-44	93.3628
RP11-24J19.1	-8.27553	-5.58919	-14.8305	7.0749e-46	1.36248e-44	93.284
TLX3	-2.77006	-10.28	-14.8257	7.50619e-46	1.44477e-44	93.2251
SLC4A9	-2.82371	-4.35073	-14.8194	8.12475e-46	1.56218e-44	93.1464
RP11-455B3.1	5.01221	-2.79744	14.8087	9.3149e-46	1.78638e-44	93.0106
GRIA1	2.56718	5.27361	14.8047	9.7771e-46	1.87395e-44	92.9624
RP11-244H3.4	3.41938	-3.60529	14.803	1.00113e-45	1.91783e-44	92.9389
Telomerase-vert	-6.27139	-6.59689	-14.8017	1.01775e-45	1.94865e-44	92.9225
CAPN12	-3.80917	-3.20903	-14.8008	1.02911e-45	1.96937e-44	92.9115
KCNH7	4.26514	-1.49291	14.7975	1.07268e-45	2.04951e-44	92.8703
RASAL1	-3.16474	2.38924	-14.7952	1.10378e-45	2.10672e-44	92.8419
TOX3	2.05092	0.976205	14.7943	1.11361e-45	2.12325e-44	92.833
INHBC	3.69733	-4.3202	14.7908	1.16663e-45	2.22319e-44	92.7868
APOA2	-5.98179	-5.58186	-14.7906	1.1702e-45	2.22882e-44	92.7838
RP3-514P16.1	3.48903	-7.01128	14.7864	1.23378e-45	2.34869e-44	92.7312
AC007906.1	5.42213	-4.59475	14.7862	1.23622e-45	2.3521e-44	92.7293
RBM22P2	-2.12746	-1.5035	-14.7847	1.25686e-45	2.39013e-44	92.7128
CTD-2647L4.4	2.20628	0.77331	14.7827	1.28851e-45	2.44777e-44	92.688
RPL21P42	5.84257	-3.86596	14.7817	1.30945e-45	2.48496e-44	92.6721
RP11-729L2.2	4.57158	-3.18893	14.7782	1.36776e-45	2.59426e-44	92.6288
OR51E2	-4.15407	-6.29046	-14.7776	1.3783e-45	2.61288e-44	92.6211
DHX9P1	2.81558	-7.90085	14.7773	1.3812e-45	2.61702e-44	92.619
AATK-AS1	-3.63161	-5.06962	-14.7745	1.43224e-45	2.70951e-44	92.583
CTD-2540B15.6	-4.70307	-2.09158	-14.7743	1.43704e-45	2.71576e-44	92.5797
RP11-700P18.2	3.34425	-7.95737	14.7742	1.43889e-45	2.71785e-44	92.5784
ZNF355P	3.01628	-7.7636	14.7525	1.8906e-45	3.56184e-44	92.307
COL8A2	2.11161	-1.27987	14.7471	2.01677e-45	3.79561e-44	92.2428
AC005235.1	3.8878	-3.30312	14.7462	2.04493e-45	3.84465e-44	92.229
MCOLN3	-3.82292	-4.6376	-14.7454	2.06618e-45	3.88259e-44	92.2187
FAM106A	3.01129	-1.99634	14.7438	2.10865e-45	3.96035e-44	92.1985
AC092198.1	-3.72976	-6.69172	-14.7393	2.23186e-45	4.18528e-44	92.1421
AC091814.2	-5.04892	-5.50492	-14.7359	2.32773e-45	4.36058e-44	92.1003
ADAMTS1	-2.22826	2.05864	-14.7348	2.3548e-45	4.40676e-44	92.0888
EPHA8	-3.33113	-1.82163	-14.7343	2.3772e-45	4.44638e-44	92.0794
COL16A1	-2.11522	4.31407	-14.7307	2.47799e-45	4.62541e-44	92.0381
LGALS16	-3.57264	-8.78922	-14.7295	2.52271e-45	4.70648e-44	92.0203
CH507-145C22.3	4.59768	-5.09824	14.7262	2.63199e-45	4.90783e-44	91.9782
RP5-1021I20.4	2.23758	-1.03797	14.7257	2.63965e-45	4.9196e-44	91.9753
GRM4	-3.08956	-0.228517	-14.7232	2.73232e-45	5.08711e-44	91.941
PLA2G3	-4.07697	-6.25995	-14.7192	2.87123e-45	5.343e-44	91.8917
RP11-98J23.2	3.50909	0.466137	14.715	3.02798e-45	5.62895e-44	91.8389
FAM167A	2.01882	4.22105	14.7136	3.07328e-45	5.71025e-44	91.8241
SNRPGP10	-3.69399	1.00224	-14.7131	3.10285e-45	5.75931e-44	91.8146
COX6A2	-3.60295	-1.4804	-14.7015	3.58902e-45	6.64142e-44	91.67
RP11-950C14.7	6.01958	-4.39776	14.7005	3.6311e-45	6.71587e-44	91.6584
AC016292.3	5.03299	-2.1527	14.699	3.70314e-45	6.84564e-44	91.6388
IGF2BP2	-2.55354	-3.08772	-14.6881	4.23271e-45	7.80876e-44	91.506
METTL7A	2.00829	6.07173	14.6878	4.24923e-45	7.83528e-44	91.5021
NRG4	-2.12169	0.217808	-14.6868	4.30026e-45	7.92536e-44	91.4902
RP11-797A18.5	3.12032	-2.75146	14.6803	4.68267e-45	8.61393e-44	91.4056
KRT8	-3.07137	-2.95221	-14.6802	4.68333e-45	8.61393e-44	91.4055
RP13-93L13.1	-5.93365	-6.46579	-14.678	4.81897e-45	8.85893e-44	91.3771
PBK	3.86749	-3.64694	14.6756	4.9617e-45	9.11671e-44	91.3481
HSFX1	2.05492	0.511436	14.675	4.98702e-45	9.15862e-44	91.343
IL33	2.10361	3.39513	14.6737	5.07075e-45	9.3077e-44	91.3264
C1orf145	-3.25228	-0.643064	-14.6733	5.11072e-45	9.37635e-44	91.3187
DKFZP434K028	-3.97731	-6.11467	-14.6729	5.13597e-45	9.41793e-44	91.3138
FAAHP1	-3.39273	-2.23026	-14.6633	5.7918e-45	1.05992e-43	91.1943
BLACAT1	2.40183	-1.07846	14.6494	6.87241e-45	1.25452e-43	91.0243
FABP3	-2.31152	5.10272	-14.6465	7.12468e-45	1.29992e-43	90.9884
NCKAP1L	2.12904	0.49873	14.6418	7.56363e-45	1.37932e-43	90.929
CYGB	-2.33762	2.17465	-14.6383	7.898e-45	1.43958e-43	90.886
SKOR2	4.33648	-7.548	14.6348	8.27049e-45	1.50672e-43	90.8403
DUSP5P1	4.03895	-1.83695	14.6346	8.29888e-45	1.51113e-43	90.8369
CHURC1-FNTB	4.73671	-1.48029	14.6335	8.40522e-45	1.52973e-43	90.8242
CCDC87	2.07867	-2.52632	14.6323	8.51851e-45	1.54958e-43	90.8109
RBP4	-2.92097	3.98272	-14.6317	8.5968e-45	1.56304e-43	90.8018
RP11-328J6.1	3.97241	-1.23739	14.6289	8.90957e-45	1.61748e-43	90.7663
AC096670.3	4.37519	-2.51396	14.6246	9.3965e-45	1.70419e-43	90.7134
PINLYP	-2.25382	1.74185	-14.62	9.93095e-45	1.79932e-43	90.6584
NEUROD4	4.44775	-6.59006	14.6165	1.03951e-44	1.88249e-43	90.613
LINC00698	4.74893	-5.11239	14.6103	1.12366e-44	2.03083e-43	90.5357
PLEKHM3	2.04264	0.456623	14.6079	1.15458e-44	2.08569e-43	90.5087
RP1-257A7.5	-2.36136	5.24645	-14.6071	1.16674e-44	2.10661e-43	90.4983
RP11-359J14.2	4.53111	-2.07947	14.6057	1.19008e-44	2.14663e-43	90.4786
SPOCK3	-2.5064	3.2926	-14.6016	1.25009e-44	2.25153e-43	90.4297
RP11-284F21.8	3.77246	-3.91628	14.5979	1.31156e-44	2.35989e-43	90.382
CSRP2	2.23293	4.94981	14.5949	1.35906e-44	2.44416e-43	90.3466
RP11-344P13.6	-4.56878	-3.21045	-14.5925	1.40343e-44	2.52147e-43	90.3147
AP001059.7	-5.47319	-5.21344	-14.5879	1.48683e-44	2.66604e-43	90.2574
PI4K2B	3.34041	-3.36717	14.5862	1.51795e-44	2.72051e-43	90.2368
KIFC1	2.55693	-2.53177	14.5791	1.65492e-44	2.95872e-43	90.1509
GCGR	-4.34036	-8.75744	-14.5703	1.85075e-44	3.3072e-43	90.0398
RP11-403A3.1	3.98837	-2.69418	14.5661	1.95084e-44	3.48094e-43	89.9874
ANKK1	-3.38304	-3.78374	-14.5643	1.99491e-44	3.55783e-43	89.9652
UBL4B	2.67864	-1.80575	14.5612	2.06989e-44	3.68976e-43	89.9285
AC004870.4	4.07601	-7.67711	14.5597	2.11197e-44	3.75925e-43	89.9086
ANKRD61	2.66694	-3.00892	14.5528	2.30091e-44	4.08956e-43	89.8234
RP11-463D19.2	5.98443	-6.71083	14.55	2.38619e-44	4.23906e-43	89.7873
LRRC61	-2.11425	1.33336	-14.5444	2.54962e-44	4.52719e-43	89.7214
CECR7	-2.10983	0.274497	-14.5441	2.55973e-44	4.54292e-43	89.7174
OR2H5P	4.73736	-3.58375	14.5412	2.66195e-44	4.71745e-43	89.6786
RPL35P1	5.03749	-1.94461	14.5376	2.78459e-44	4.93239e-43	89.6338
RP11-341D18.7	3.99497	-4.97055	14.5338	2.9171e-44	5.16459e-43	89.5876
RP11-2B6.2	5.17816	-2.88172	14.5331	2.94255e-44	5.20712e-43	89.579
DIO3OS	-2.24029	1.15429	-14.5308	3.02057e-44	5.34261e-43	89.5529
AC090587.4	4.39198	-0.874963	14.5299	3.06297e-44	5.41497e-43	89.5391
CPA2	-3.81888	-4.24085	-14.5289	3.10176e-44	5.47556e-43	89.5266
RP11-627K11.1	4.46369	-5.85717	14.5274	3.15868e-44	5.57335e-43	89.5085
BEGAIN	-2.233	3.68372	-14.526	3.20869e-44	5.65884e-43	89.4929
RP11-100M12.3	-4.63328	-0.692864	-14.5209	3.42668e-44	6.04038e-43	89.4276
PLXNA4	2.09383	2.40586	14.5169	3.59124e-44	6.32433e-43	89.381
SEPT4	-2.52176	6.71223	-14.5131	3.76863e-44	6.62711e-43	89.3331
VSIG8	-3.68102	-5.96777	-14.5094	3.95205e-44	6.93962e-43	89.2859
SPON1	2.26066	4.21038	14.5082	4.00391e-44	7.02729e-43	89.2729
RP11-693J15.5	3.18836	-7.28248	14.5055	4.14845e-44	7.27396e-43	89.2377
KCTD19	-3.68699	-5.18709	-14.5038	4.23998e-44	7.43088e-43	89.216
ANKRD1	-3.76698	-3.97704	-14.5019	4.34131e-44	7.60116e-43	89.1925
SLC7A3	3.11966	-0.116605	14.5011	4.38466e-44	7.66987e-43	89.1826
ZNF750	-3.0223	-5.98301	-14.5011	4.38477e-44	7.66987e-43	89.1826
MIR4435-2HG	-2.19565	1.89293	-14.4965	4.62693e-44	8.07408e-43	89.1291
EGFR-AS1	3.42315	-4.96919	14.4928	4.8602e-44	8.47303e-43	89.0803
CHL1-AS1	4.98847	-5.27669	14.492	4.90691e-44	8.55037e-43	89.0708
RP11-426C22.5	-3.7801	-4.15649	-14.488	5.16031e-44	8.97904e-43	89.0208
RP11-390G14.1	4.73732	-2.05961	14.4878	5.16767e-44	8.98755e-43	89.0193
FER1L5	-2.94491	-3.90625	-14.485	5.35093e-44	9.2974e-43	88.9847
FAM95B1	-2.1067	0.92719	-14.4777	5.84692e-44	1.01495e-42	88.8966
GALNT13	2.13689	2.65619	14.4761	5.96569e-44	1.03458e-42	88.8766
S100A1	-2.6842	7.38482	-14.4758	5.99295e-44	1.03832e-42	88.8721
AC018865.5	4.18646	-5.04224	14.4726	6.24328e-44	1.08067e-42	88.8314
AC002429.5	2.60904	-0.126943	14.4677	6.62377e-44	1.14544e-42	88.7726
FEZF1	-4.8669	-6.72056	-14.4602	7.2863e-44	1.25703e-42	88.6779
NPHP3-AS1	3.44147	-5.91448	14.4571	7.56533e-44	1.30455e-42	88.6406
WNT10A	-3.33449	-2.16651	-14.4565	7.62767e-44	1.31467e-42	88.6324
ZFPM2	2.04772	1.95979	14.4535	7.89468e-44	1.35941e-42	88.5982
TLE1P1	2.53204	0.400818	14.4516	8.08191e-44	1.39099e-42	88.5749
CD44	2.96235	2.72825	14.4487	8.39448e-44	1.4441e-42	88.5372
PRR32	4.50532	-6.91694	14.4419	9.13604e-44	1.56945e-42	88.4531
CUZD1	-2.20456	-2.00212	-14.4381	9.55553e-44	1.63843e-42	88.4085
SLC35F3	-2.62133	1.04546	-14.435	9.93572e-44	1.70201e-42	88.3697
PRND	-3.84789	-7.39544	-14.4342	1.00552e-43	1.72167e-42	88.3579
MESP2	-2.5841	-1.81372	-14.4324	1.02646e-43	1.75669e-42	88.3374
RP5-1056L3.3	-3.29323	-1.54266	-14.4293	1.06879e-43	1.82828e-42	88.2972
RP11-930P14.1	4.08258	-2.04286	14.4284	1.07974e-43	1.84615e-42	88.2871
KRT78	-4.61367	-5.77406	-14.4246	1.13209e-43	1.93294e-42	88.24
RP11-195F19.5	-2.54346	4.16128	-14.4202	1.19359e-43	2.03603e-42	88.1874
OCIAD2	-2.29981	3.48951	-14.4199	1.19729e-43	2.04138e-42	88.1844
RP11-234K24.3	-2.64278	-0.904856	-14.4195	1.20413e-43	2.0521e-42	88.1787
TAS2R3	4.57579	-4.04535	14.4193	1.20956e-43	2.06038e-42	88.1743
TEKT1	3.37828	-0.611916	14.4121	1.32144e-43	2.2478e-42	88.0864
RP3-406A7.7	-2.30381	2.72498	-14.4049	1.44042e-43	2.44791e-42	88.0007
PIGY	8.86057	-1.11732	14.3961	1.61004e-43	2.73108e-42	87.8901
PROX2	2.04754	-1.97225	14.3929	1.67235e-43	2.83412e-42	87.8523
RP11-63M22.2	-5.54395	-0.366286	-14.385	1.84702e-43	3.12869e-42	87.7536
TCF15	-2.2526	-1.72964	-14.3807	1.94437e-43	3.29206e-42	87.7025
IGFBP6	-2.13919	3.1734	-14.377	2.03352e-43	3.4414e-42	87.658
PLIN5	-2.292	1.64632	-14.372	2.16468e-43	3.66167e-42	87.5959
C9orf171	4.39379	-4.80755	14.3707	2.20397e-43	3.7264e-42	87.578
FBP2	-4.15861	-8.66342	-14.3701	2.22165e-43	3.7528e-42	87.5701
PTGS1	2.13178	-0.0278138	14.367	2.30138e-43	3.88208e-42	87.535
AC073072.7	4.91667	-7.31226	14.365	2.365e-43	3.98571e-42	87.508
RP11-409C19.2	3.27564	-3.40312	14.3364	3.36656e-43	5.65532e-42	87.1571
BZW1P2	3.37749	1.4659	14.335	3.42514e-43	5.75108e-42	87.14
RP11-327J17.7	-3.06114	-9.07712	-14.3306	3.61472e-43	6.06381e-42	87.0864
CTB-35F21.1	5.19462	-5.55817	14.3303	3.63076e-43	6.08792e-42	87.082
RP11-339B21.8	-3.28765	-3.42187	-14.3296	3.66022e-43	6.13448e-42	87.074
RP11-133F8.2	6.26092	-2.82049	14.3278	3.74365e-43	6.26856e-42	87.0516
RP1-234P15.4	2.5376	-0.943398	14.3266	3.79121e-43	6.34526e-42	87.039
RP11-588G21.2	4.66405	-4.27979	14.3263	3.81118e-43	6.37576e-42	87.0338
CERKL	2.27531	-0.530335	14.3243	3.89761e-43	6.51437e-42	87.0115
RP11-697H10.1	4.29607	-8.03907	14.3226	3.9894e-43	6.66168e-42	86.9884
ABCC6P2	4.03874	-1.91295	14.3212	4.06043e-43	6.77718e-42	86.9709
PLAC4	-2.72371	-8.99782	-14.3207	4.08321e-43	6.81207e-42	86.9653
SIRPAP1	3.26436	-2.72201	14.3146	4.40483e-43	7.34527e-42	86.89
HABP2	3.51451	-2.12032	14.3123	4.52868e-43	7.54491e-42	86.8624
HHIP	-2.51303	-0.898316	-14.3056	4.90984e-43	8.16989e-42	86.7821
PKIB	-2.28946	0.744236	-14.3056	4.91054e-43	8.16989e-42	86.782
SELPLG	2.13905	2.17286	14.3001	5.25153e-43	8.72526e-42	86.7153
FAM133CP	4.7884	-5.35206	14.2955	5.57196e-43	9.24499e-42	86.6565
ZC3H11B	3.96397	-5.79678	14.2911	5.88138e-43	9.74507e-42	86.6028
PAPPA-AS2	3.62989	-4.0889	14.2861	6.25556e-43	1.03556e-41	86.5415
RP1-301L19.1	-2.88869	-2.00324	-14.2858	6.27779e-43	1.03877e-41	86.5379
C10orf67	-3.49502	-4.22355	-14.2844	6.38693e-43	1.05635e-41	86.5208
KCNK15	-3.02834	-3.44724	-14.2825	6.53707e-43	1.07971e-41	86.4977
TAC1	-4.07872	2.23922	-14.2777	6.93778e-43	1.14486e-41	86.4386
FLRT3	2.00432	1.45916	14.2766	7.01344e-43	1.15682e-41	86.4278
RP11-384O8.1	-2.38283	1.10515	-14.2754	7.11659e-43	1.1733e-41	86.4133
COX6B2	-3.35537	-5.40177	-14.275	7.17273e-43	1.18202e-41	86.4055
KCNQ1OT1	-2.15362	-5.38032	-14.2739	7.24855e-43	1.19398e-41	86.395
MYLPF	-2.90061	-1.44653	-14.2714	7.49157e-43	1.23345e-41	86.3623
MCTS2P	2.61716	0.539962	14.2709	7.53201e-43	1.23955e-41	86.3569
RP11-390F4.2	5.91125	-4.44449	14.2708	7.55312e-43	1.24246e-41	86.3542
LINC01142	3.32292	-8.34386	14.2677	7.84146e-43	1.28931e-41	86.317
LINC00599	-2.72324	4.37394	-14.2655	8.05257e-43	1.32343e-41	86.2905
MYO3A	-3.67086	-5.97561	-14.2634	8.26984e-43	1.35852e-41	86.2641
CTC-471J1.10	5.32364	-2.99513	14.2598	8.64648e-43	1.41847e-41	86.2199
AC008074.1	5.15108	-5.76567	14.2594	8.68197e-43	1.42366e-41	86.2158
RP11-66B24.2	-4.20579	-5.13915	-14.2568	8.96193e-43	1.4689e-41	86.1842
HCG15	3.83905	-4.75999	14.2552	9.14487e-43	1.49754e-41	86.1642
RPL7P38	2.85553	-0.861375	14.2549	9.18063e-43	1.50272e-41	86.1603
HAPLN2	-2.7843	3.61476	-14.2537	9.30368e-43	1.52218e-41	86.1471
CD248	-2.09632	-0.396567	-14.2486	9.89126e-43	1.61324e-41	86.0862
VAX2	2.05596	0.0945374	14.2484	9.92125e-43	1.61741e-41	86.0832
RP11-522B15.3	-3.72801	-6.19664	-14.2466	1.01587e-42	1.65464e-41	86.0597
TCP10L2	-5.05513	-6.52873	-14.2398	1.10439e-42	1.79802e-41	85.9767
TNN	2.78193	-3.72099	14.2359	1.15896e-42	1.8835e-41	85.9288
RGS18	2.36481	-1.53654	14.2307	1.23227e-42	1.99996e-41	85.8678
CTD-2555K7.1	5.5184	-5.7105	14.2255	1.31735e-42	2.13424e-41	85.8015
FAM103A2P	6.90059	0.904762	14.2253	1.31927e-42	2.1364e-41	85.8
EIF2B5-AS1	4.61253	-7.1803	14.2201	1.40641e-42	2.27346e-41	85.7365
CTD-2541J13.2	-6.34447	-2.591	-14.2193	1.42037e-42	2.29501e-41	85.7267
KRT8P36	-3.90209	-8.69033	-14.2186	1.43208e-42	2.31188e-41	85.7185
MMP17	-2.1683	4.4046	-14.2148	1.49718e-42	2.41484e-41	85.6743
CLEC4G	-3.7403	-1.06903	-14.2127	1.54036e-42	2.48339e-41	85.6461
SLC22A15	-2.09603	0.474263	-14.2056	1.67619e-42	2.69999e-41	85.5621
RP11-36B6.1	3.95148	-4.13582	14.1901	2.03062e-42	3.26801e-41	85.3716
AC087163.2	3.6525	-1.83122	14.1863	2.12771e-42	3.42124e-41	85.3252
ST14	2.39545	-0.679441	14.1852	2.15328e-42	3.46082e-41	85.3133
RP11-81K13.1	6.20088	2.59662	14.1841	2.18691e-42	3.51333e-41	85.2979
RP11-33A14.1	4.8112	-1.96792	14.1828	2.22173e-42	3.56613e-41	85.2822
RP11-325I22.3	-3.32249	-6.58184	-14.1817	2.25204e-42	3.61159e-41	85.2687
LDHAP7	4.09031	-7.3459	14.1761	2.41206e-42	3.86142e-41	85.2005
CORO6	-2.48907	4.09005	-14.1699	2.59649e-42	4.14938e-41	85.1273
RP11-137N23.1	4.79477	-3.44213	14.1681	2.65843e-42	4.24464e-41	85.1039
RP1-65J11.1	2.60729	-2.37313	14.1671	2.68721e-42	4.28871e-41	85.0932
RP11-353N14.5	-2.98041	-7.58562	-14.1643	2.78411e-42	4.43753e-41	85.058
CCL4	3.61701	0.627636	14.1576	3.02459e-42	4.8166e-41	84.9757
AC012501.3	3.99792	-7.30764	14.1564	3.06939e-42	4.88155e-41	84.9611
GDAP1L1	2.26121	5.55363	14.1561	3.07295e-42	4.88509e-41	84.9599
RP11-521D12.1	-4.66148	-6.87468	-14.1505	3.2989e-42	5.23513e-41	84.8894
RP4-800O15.2	-3.37952	-8.48362	-14.1379	3.84792e-42	6.09578e-41	84.7365
LUC7L2	6.2374	2.47084	14.1322	4.12227e-42	6.52189e-41	84.6681
RP11-43F13.3	-3.55272	-7.20562	-14.1268	4.40331e-42	6.9635e-41	84.6025
RPS3AP47	4.00323	-4.41628	14.1217	4.6845e-42	7.40175e-41	84.541
RP11-66B24.1	-4.52921	-4.21635	-14.1155	5.0579e-42	7.98135e-41	84.4648
CLPS	-6.52686	-4.36969	-14.1118	5.28653e-42	8.33852e-41	84.4209
LPAR5	2.13397	0.355466	14.1041	5.79399e-42	9.12316e-41	84.3298
LINC01085	2.72738	-2.22387	14.1034	5.85752e-42	9.2192e-41	84.319
SCN9A	-2.89766	-2.26193	-14.1018	5.97645e-42	9.40232e-41	84.2991
LECT1	-3.33348	-1.71439	-14.1009	6.04192e-42	9.50123e-41	84.2882
SYK	2.02477	-0.347664	14.1004	6.06347e-42	9.52726e-41	84.2847
RP11-490G8.1	5.30007	-5.24306	14.1006	6.06371e-42	9.52726e-41	84.2847
FGF22	-2.16292	0.867353	-14.0957	6.4214e-42	1.00849e-40	84.2277
CTD-3224K15.2	4.94043	-3.88467	14.089	6.98083e-42	1.09446e-40	84.1447
RN7SL336P	6.31894	-3.08912	14.0877	7.09635e-42	1.11162e-40	84.1284
TMPRSS3	-4.16202	-1.62658	-14.0847	7.35907e-42	1.15178e-40	84.0923
KHSRPP1	2.59446	-8.57731	14.0842	7.39563e-42	1.15701e-40	84.0874
RP11-620J15.2	3.86792	-5.87994	14.0661	9.22542e-42	1.43894e-40	83.8677
TAC4	4.99038	-5.68155	14.065	9.34668e-42	1.45723e-40	83.8548
RP11-627D16.2	4.45832	-7.93463	14.0639	9.4752e-42	1.47664e-40	83.8412
LCN10	-3.18478	-2.04997	-14.0626	9.62681e-42	1.49963e-40	83.8254
TNRC18P2	2.73538	-6.87669	14.0603	9.89104e-42	1.54013e-40	83.7985
AATK	-2.11751	4.36408	-14.0582	1.01306e-41	1.57541e-40	83.7747
RP1-140K8.5	3.49934	-5.83512	14.0582	1.01566e-41	1.57879e-40	83.7722
IQCA1-AS1	4.66665	-7.15947	14.0498	1.12537e-41	1.74634e-40	83.6703
RRM2	3.91661	-3.20952	14.0475	1.15687e-41	1.79369e-40	83.6429
RP5-968J1.1	6.23443	-1.44531	14.0452	1.19013e-41	1.84447e-40	83.6147
P2RY2	-3.08492	-3.11191	-14.0441	1.20583e-41	1.86721e-40	83.6017
RP13-143G15.4	-4.16769	-7.20421	-14.0366	1.32028e-41	2.03925e-40	83.5116
PRR35	-3.84245	-7.53128	-14.0337	1.36762e-41	2.11147e-40	83.4766
B3GAT2	2.00019	3.31443	14.0332	1.37272e-41	2.11845e-40	83.4729
OR11K1P	4.50047	-6.87998	14.0326	1.38614e-41	2.13824e-40	83.4633
RP11-567M16.1	-2.39406	-4.14221	-14.0293	1.44083e-41	2.22074e-40	83.4248
CYP11B1	-4.28096	-7.35159	-14.0265	1.49355e-41	2.29917e-40	83.3891
FABP5P7	-2.72835	3.81646	-14.0264	1.49362e-41	2.29917e-40	83.3891
RP11-463C8.7	2.6601	-0.371305	14.0257	1.50544e-41	2.31639e-40	83.3812
RP11-332H18.5	4.55735	-7.30986	14.021	1.59676e-41	2.45587e-40	83.3227
KANK4	-2.69554	-3.57663	-14.0178	1.65784e-41	2.54874e-40	83.2854
CTD-2510F5.4	5.60262	-4.53315	14.0174	1.66701e-41	2.56175e-40	83.28
LAP3P2	2.96839	-7.9463	14.0167	1.682e-41	2.5837e-40	83.2711
CHRND	-3.60831	-6.37955	-14.0149	1.7192e-41	2.63861e-40	83.2493
EDNRB	2.32995	4.59751	14.0145	1.72262e-41	2.64275e-40	83.2473
FAM153A	-3.78778	1.80548	-14.0058	1.91914e-41	2.943e-40	83.14
ALOX15	-3.54241	-4.05933	-14.0041	1.9597e-41	3.00393e-40	83.1193
KRTAP5-8	-3.08443	-3.84265	-14.0028	1.99063e-41	3.05007e-40	83.1037
RP5-1025A1.3	-4.2943	-2.3528	-14.0001	2.05793e-41	3.15054e-40	83.0707
CTB-41I6.2	4.38541	-6.64992	13.998	2.1105e-41	3.22966e-40	83.0456
TUBBP1	2.79598	-2.76282	13.9939	2.21749e-41	3.39196e-40	82.9965
TCEB1P19	5.39665	-1.90827	13.9857	2.4501e-41	3.73836e-40	82.8974
RP11-20J15.3	-3.23082	-2.07484	-13.9854	2.45812e-41	3.74902e-40	82.8941
RP11-1193F23.1	2.82878	-8.44936	13.984	2.50022e-41	3.81163e-40	82.8773
CTC-429P9.5	2.62185	0.476746	13.9829	2.53063e-41	3.85639e-40	82.8652
CD84	2.18761	-1.38014	13.9739	2.81879e-41	4.28833e-40	82.7581
RPL34P18	-4.66712	-3.03482	-13.9705	2.94302e-41	4.47546e-40	82.7153
GABBR2	2.44633	5.10557	13.9686	3.0056e-41	4.56871e-40	82.6944
H2AFZP3	5.11394	-5.02011	13.9671	3.06723e-41	4.66044e-40	82.6742
AC005785.2	-2.27836	-1.2358	-13.9602	3.32788e-41	5.04386e-40	82.5932
KRT4	-5.74483	-5.58189	-13.959	3.38498e-41	5.12828e-40	82.5763
NUPR1L	-4.21098	-0.326592	-13.9571	3.46057e-41	5.23627e-40	82.5544
RP11-50D9.3	-2.56491	-3.94811	-13.9515	3.70161e-41	5.59635e-40	82.4874
RP11-7D5.2	3.1311	-8.55632	13.9424	4.13648e-41	6.24345e-40	82.3771
MYH6	-3.29213	-4.26481	-13.9398	4.26535e-41	6.42731e-40	82.3466
RGR	3.01987	3.62022	13.9339	4.58524e-41	6.89793e-40	82.2748
RP13-43E11.1	4.24562	-6.99937	13.9323	4.67432e-41	7.02904e-40	82.2557
TYMSOS	-2.39819	-1.08451	-13.931	4.73498e-41	7.11732e-40	82.2428
RP11-285F7.2	-2.16343	1.19027	-13.9303	4.77425e-41	7.17042e-40	82.2346
SRP9P1	5.73691	4.12059	13.9227	5.24742e-41	7.87134e-40	82.1408
LINC00945	4.40526	-5.97144	13.921	5.3586e-41	8.03151e-40	82.12
LINC01126	2.27906	-2.58157	13.9193	5.45464e-41	8.16874e-40	82.1023
RP1-288L1.5	4.55	-3.89864	13.9183	5.53383e-41	8.28053e-40	82.088
SYNE1-AS1	4.5697	-6.41705	13.9168	5.63426e-41	8.42734e-40	82.0701
CTC-529L17.2	4.7882	-5.90268	13.9084	6.23445e-41	9.32124e-40	81.9696
AC009227.2	3.8199	-6.35242	13.9028	6.67277e-41	9.96839e-40	81.9021
CSNK2A3	2.83174	-1.3872	13.9011	6.81133e-41	1.01712e-39	81.8817
RP5-827E24.1	4.61273	-0.348444	13.8926	7.54343e-41	1.1246e-39	81.7803
CTA-397H3.3	3.53719	-8.32871	13.8892	7.86217e-41	1.17116e-39	81.7391
KCNG3	-3.86279	-3.35662	-13.8862	8.15529e-41	1.21383e-39	81.7028
CSRP3	-4.05747	-6.17978	-13.8853	8.24331e-41	1.22643e-39	81.6921
RP11-586K2.1	3.03255	-0.472395	13.8825	8.51885e-41	1.26691e-39	81.6595
CD8A	-2.16038	-0.504319	-13.8749	9.31759e-41	1.38175e-39	81.5704
CTB-107G13.1	-3.28553	-8.65693	-13.8635	1.07165e-40	1.58791e-39	81.4315
LCE1D	4.86403	-7.26879	13.8623	1.08665e-40	1.60949e-39	81.4177
P2RX5	-2.26015	2.14867	-13.8597	1.1186e-40	1.65613e-39	81.3889
RP11-357G3.1	3.85375	-7.68014	13.8571	1.15766e-40	1.71188e-39	81.3548
RPL5P29	3.49476	-8.37044	13.8565	1.16522e-40	1.72235e-39	81.3483
KCNRG	2.32066	-1.92296	13.8552	1.18169e-40	1.74599e-39	81.3344
RP1-34H18.1	3.72697	-0.258197	13.854	1.20119e-40	1.77408e-39	81.3181
CTD-2325P2.2	5.34406	-4.67662	13.8529	1.21674e-40	1.79559e-39	81.3054
SIX1	2.76113	-2.19369	13.852	1.22943e-40	1.81358e-39	81.295
RP11-789C17.5	-7.25524	-2.70747	-13.8496	1.26719e-40	1.86702e-39	81.265
RBMXP2	3.85924	-6.11436	13.8471	1.30595e-40	1.92257e-39	81.2351
ALDH3B2	-3.9753	-8.50367	-13.8466	1.31352e-40	1.93293e-39	81.2293
AP001172.2	5.00202	-3.87157	13.8465	1.31492e-40	1.93421e-39	81.2283
RP11-8L8.2	4.08254	-6.14838	13.8463	1.31778e-40	1.93763e-39	81.2261
MDFI	2.24607	2.06121	13.8427	1.37234e-40	2.01705e-39	81.1858
AC079776.2	-4.96997	-3.05189	-13.8349	1.51102e-40	2.2182e-39	81.0902
RP1-93H18.1	3.97533	-4.3184	13.8326	1.55377e-40	2.28002e-39	81.0625
WNT6	-2.30595	-2.06516	-13.8311	1.57908e-40	2.31531e-39	81.0464
AC144835.1	4.21677	-3.6411	13.8268	1.66617e-40	2.44005e-39	80.9931
RP5-1061H20.4	2.43742	0.41022	13.8225	1.75212e-40	2.56077e-39	80.9431
FOXA2	-3.53203	-11.275	-13.8205	1.79778e-40	2.62645e-39	80.9176
MBP	-3.58059	9.6408	-13.8198	1.81185e-40	2.64596e-39	80.9098
RP11-403B2.10	3.39884	-7.75727	13.8193	1.82378e-40	2.66124e-39	80.9033
RP11-798K3.2	-3.94396	-2.40602	-13.8115	2.00234e-40	2.91596e-39	80.8105
RP11-159N11.4	-3.0347	-1.83796	-13.8065	2.12578e-40	3.09448e-39	80.7511
OR4Q1P	2.99336	-8.54869	13.8062	2.13393e-40	3.1051e-39	80.7473
PLAC1	3.85962	-6.88764	13.8041	2.18829e-40	3.18166e-39	80.7223
HOXD8	4.85432	-6.45847	13.8017	2.25346e-40	3.27381e-39	80.6932
P2RY13	2.16651	0.100651	13.8003	2.28538e-40	3.31753e-39	80.6792
TRPC5OS	3.05215	-4.35031	13.7986	2.33841e-40	3.39316e-39	80.6564
GATA5	4.24945	-7.0755	13.7965	2.39649e-40	3.47605e-39	80.6321
LILRB4	2.31839	1.46176	13.7955	2.42058e-40	3.5096e-39	80.6221
SLC28A1	3.52681	-6.2251	13.7914	2.54806e-40	3.69149e-39	80.5711
TULP1	-4.39901	-6.90649	-13.7911	2.55883e-40	3.7052e-39	80.5669
RP5-1031D4.2	4.51138	-6.95745	13.791	2.55956e-40	3.7052e-39	80.5667
FOXD3-AS1	5.42037	-5.39174	13.79	2.59233e-40	3.75116e-39	80.554
LINC01397	5.12002	-3.74743	13.7857	2.72748e-40	3.94515e-39	80.5035
PGAM4	4.57737	-3.6362	13.7853	2.74187e-40	3.9644e-39	80.4983
AC006042.7	4.35948	-7.15361	13.7837	2.79359e-40	4.03758e-39	80.4798
RP11-760D2.7	4.0291	-7.25897	13.7755	3.08219e-40	4.44763e-39	80.3821
MAP2K1P1	3.45906	-7.20886	13.7746	3.11651e-40	4.49359e-39	80.3711
IFNA6	-3.92471	-6.84106	-13.774	3.14047e-40	4.52635e-39	80.3635
RP11-24N18.1	-6.40081	1.6834	-13.7721	3.21301e-40	4.62907e-39	80.3408
RP11-1406H17.1	-3.47774	0.640285	-13.7713	3.24207e-40	4.66909e-39	80.3319
C2CD4D	-2.90864	-3.1733	-13.7669	3.41669e-40	4.91668e-39	80.2798
LINC00871	-4.75612	-8.9398	-13.7652	3.48686e-40	5.01568e-39	80.2596
AIFM3	-2.55622	4.79839	-13.7644	3.51763e-40	5.05795e-39	80.2508
AC124914.3	5.00967	-5.56442	13.7641	3.53463e-40	5.08039e-39	80.2461
IYD	-3.58127	-8.04393	-13.7637	3.55399e-40	5.10619e-39	80.2406
RP11-358D17.2	3.81457	-5.0448	13.7557	3.91015e-40	5.60907e-39	80.1458
ADARB2-AS1	-5.25979	-5.68878	-13.7514	4.11627e-40	5.90009e-39	80.0947
WNT7A	2.00365	1.55403	13.7461	4.37332e-40	6.26116e-39	80.0345
RP11-571M6.7	-7.2665	-7.73542	-13.7423	4.59161e-40	6.57109e-39	79.9862
ENO1P4	4.8592	-7.84666	13.7421	4.60261e-40	6.58425e-39	79.9838
MTL5	-2.48785	-2.73295	-13.7379	4.83132e-40	6.906e-39	79.9356
RP11-616M22.12	-5.42383	-8.02956	-13.7325	5.15728e-40	7.36615e-39	79.8708
RP11-259N19.1	2.0866	-1.33084	13.7304	5.28042e-40	7.53612e-39	79.8473
RP11-638I2.6	-2.22348	3.14357	-13.7289	5.37274e-40	7.66188e-39	79.8301
FAM153C	-4.14304	2.55468	-13.7221	5.8427e-40	8.32557e-39	79.7469
PCDHGA1	2.15204	-0.380726	13.7134	6.46571e-40	9.20253e-39	79.6462
STC2	2.4367	-0.624559	13.71	6.7419e-40	9.58812e-39	79.6047
UBXN10-AS1	-3.33429	-0.261875	-13.6958	8.00129e-40	1.13482e-38	79.4346
TACR3	-3.18841	-5.87227	-13.6939	8.18739e-40	1.16076e-38	79.4117
NLRP14	3.26853	-4.68126	13.6899	8.58596e-40	1.21632e-38	79.3645
AVP	-5.5512	-7.54824	-13.6894	8.63531e-40	1.22284e-38	79.3588
PKHD1L1	-4.13466	-6.64274	-13.6888	8.69179e-40	1.23036e-38	79.3524
RP11-35N6.1	2.15053	3.6153	13.6886	8.69734e-40	1.23067e-38	79.3517
ADIPOQ	-3.3268	-6.99427	-13.6882	8.75571e-40	1.23844e-38	79.3451
COL22A1	3.26465	0.0177444	13.6837	9.23837e-40	1.3057e-38	79.2918
SPC25	2.30854	-0.297741	13.6832	9.27842e-40	1.31085e-38	79.2875
RP13-616I3.1	-2.27013	-0.703966	-13.6797	9.67044e-40	1.36571e-38	79.2464
RP3-418C23.2	4.62645	-2.95798	13.6719	1.06372e-39	1.49992e-38	79.1517
TSPAN2	-2.18436	-1.82876	-13.6712	1.07095e-39	1.50952e-38	79.145
TTC22	-3.14673	-3.21371	-13.6688	1.10388e-39	1.55473e-38	79.1149
FAM111B	3.96948	-5.90795	13.667	1.12766e-39	1.58761e-38	79.0938
PSMC1P9	2.95125	-8.13412	13.6669	1.12914e-39	1.58909e-38	79.0925
CEACAM6	-3.88231	-7.27814	-13.6659	1.14251e-39	1.60665e-38	79.0808
AQP4	2.50637	7.35701	13.6591	1.23749e-39	1.73754e-38	79.0014
PPAN-P2RY11	5.95883	-3.59256	13.6534	1.32592e-39	1.86027e-38	78.9329
RASGRF2-AS1	-3.57718	-0.715993	-13.6523	1.34413e-39	1.88437e-38	78.9194
PYDC1	-4.48708	-0.574067	-13.6408	1.54014e-39	2.15419e-38	78.7842
RP11-31I22.2	-4.19169	-4.29825	-13.64	1.55459e-39	2.17357e-38	78.7749
MSH4	-2.71992	-5.02507	-13.6383	1.58695e-39	2.21625e-38	78.7544
MNX1-AS1	4.14639	-8.11254	13.634	1.67013e-39	2.32796e-38	78.7037
AKR1B15	3.90977	-7.1786	13.633	1.69055e-39	2.35552e-38	78.6916
SLC2A5	2.20078	2.29041	13.6277	1.79725e-39	2.50037e-38	78.6308
AC073046.25	5.34641	-4.79069	13.6241	1.87964e-39	2.61299e-38	78.5863
RPL4P1	3.40169	-7.08457	13.6201	1.96965e-39	2.73395e-38	78.5399
C10orf71	-2.77729	-8.95057	-13.6171	2.04273e-39	2.83323e-38	78.5037
A2ML1	2.13754	1.45657	13.6157	2.07345e-39	2.87474e-38	78.4888
SLC18A3	-4.2396	-10.0876	-13.6131	2.14114e-39	2.96746e-38	78.4569
RP1-290F12.3	4.95382	-6.11571	13.6072	2.29632e-39	3.17649e-38	78.3875
RP11-284F21.7	2.41938	1.16516	13.6069	2.30313e-39	3.18471e-38	78.3845
ANKRD36BP2	-3.07265	-0.333237	-13.6058	2.33534e-39	3.22802e-38	78.3707
BTBD16	-3.26566	-2.92197	-13.6044	2.37357e-39	3.27961e-38	78.3546
RP11-701H24.3	3.66875	1.01178	13.594	2.68658e-39	3.70648e-38	78.2316
CTD-3193K9.4	-6.44506	-7.5941	-13.5907	2.7956e-39	3.85397e-38	78.1921
LUZP2	2.20954	2.64152	13.5837	3.03001e-39	4.16923e-38	78.1121
TMEM171	-3.21127	-3.37647	-13.5826	3.07641e-39	4.23149e-38	78.097
E2F3P2	3.95956	-5.18607	13.58	3.17366e-39	4.36196e-38	78.0661
RP11-420B22.2	4.09981	-8.08567	13.5776	3.26244e-39	4.48229e-38	78.0387
RP5-998H6.2	3.41306	-5.43416	13.577	3.2891e-39	4.51441e-38	78.0306
RP11-81H3.2	-4.62032	-4.90138	-13.5769	3.28954e-39	4.51441e-38	78.0305
LINC01322	2.95647	0.644165	13.5744	3.38984e-39	4.64856e-38	78.0006
RP5-1024N4.5	-4.20881	-6.24647	-13.5739	3.41101e-39	4.67583e-38	77.9945
JMJD1C-AS1	2.29348	-1.76577	13.5699	3.57118e-39	4.89355e-38	77.9489
CH17-431G21.1	2.34021	1.48656	13.567	3.69603e-39	5.06272e-38	77.9147
RP11-193M21.1	-4.16885	-3.88152	-13.5626	3.90066e-39	5.33701e-38	77.8612
AC073283.4	2.38586	-0.546216	13.5617	3.93472e-39	5.38159e-38	77.8526
RP11-429P3.3	4.81378	-6.3965	13.5592	4.05974e-39	5.54842e-38	77.8215
CH507-24F1.1	4.13177	-4.13819	13.5539	4.32537e-39	5.90701e-38	77.7586
RP11-158M2.2	4.40068	-6.80723	13.5533	4.3537e-39	5.94348e-38	77.7521
SFRP5	-3.11612	-2.95451	-13.5526	4.38774e-39	5.98546e-38	77.7444
CTA-38K21.2	-3.06841	-6.38895	-13.5521	4.41639e-39	6.02229e-38	77.7379
CKAP2L	3.21228	-4.0478	13.5483	4.62078e-39	6.29629e-38	77.693
YWHABP1	-4.74526	-8.41366	-13.5433	4.901e-39	6.66815e-38	77.6345
VWA3B	2.57048	-0.601876	13.5396	5.11762e-39	6.96027e-38	77.5916
DNAAF3	2.83884	-1.04842	13.5383	5.19902e-39	7.06834e-38	77.5759
ID3	2.2005	5.26185	13.5345	5.42636e-39	7.36643e-38	77.5334
RP11-353N4.5	5.41255	-4.23129	13.534	5.46886e-39	7.41583e-38	77.5256
DPT	-2.8775	-2.98752	-13.5308	5.67964e-39	7.69878e-38	77.4881
RP11-63E9.1	3.52756	-5.73069	13.5291	5.79539e-39	7.85276e-38	77.468
RHOQP2	4.82595	-4.68323	13.5233	6.20911e-39	8.41023e-38	77.3996
RP11-791G16.4	3.76528	-6.43431	13.5111	7.17537e-39	9.7046e-38	77.2559
GSX1	3.74864	-1.89213	13.5109	7.18936e-39	9.71991e-38	77.254
AC004485.3	4.36709	-7.57009	13.5042	7.78489e-39	1.05095e-37	77.175
ST13P4	3.29341	-2.84283	13.5032	7.87392e-39	1.06257e-37	77.1637
RP11-1055B8.4	-2.09917	2.03757	-13.4972	8.43717e-39	1.13816e-37	77.095
KCNJ16	2.5156	2.55805	13.4961	8.55991e-39	1.15386e-37	77.0807
VSIG2	-2.05	-1.57288	-13.4937	8.79252e-39	1.1839e-37	77.0541
CCL4L2	4.01752	1.24788	13.493	8.87882e-39	1.19464e-37	77.0444
RP11-341D18.4	-3.76104	-6.22689	-13.4858	9.66993e-39	1.29917e-37	76.9596
PTGER4P2	6.31322	-4.39665	13.4812	1.02109e-38	1.37032e-37	76.9056
RP11-690I21.2	2.67836	-1.84917	13.4737	1.11498e-38	1.49468e-37	76.8182
KRT77	-3.39373	-7.89959	-13.4713	1.14686e-38	1.53572e-37	76.7902
RP11-230B22.1	2.58897	-1.63887	13.4682	1.18884e-38	1.59018e-37	76.7545
NEIL3	3.5061	-6.89214	13.4658	1.22501e-38	1.63797e-37	76.7247
E2F8	3.49206	-6.29819	13.4646	1.24239e-38	1.65998e-37	76.7108
CTD-2562J17.4	-4.87722	-0.741903	-13.4639	1.25236e-38	1.67269e-37	76.7028
TMEM88B	-4.00266	-0.423097	-13.4637	1.25508e-38	1.67571e-37	76.7007
RBM11	-2.22079	0.7251	-13.4611	1.29137e-38	1.72353e-37	76.6723
AC007040.8	4.19304	-7.65833	13.4603	1.30571e-38	1.74139e-37	76.6614
AC093802.1	3.50864	-4.42733	13.4574	1.35135e-38	1.80029e-37	76.6273
RP11-14C10.5	4.44215	-7.52757	13.4544	1.40007e-38	1.86451e-37	76.5921
XXbac-BPG246D15.9	5.03536	-2.34221	13.449	1.49215e-38	1.98495e-37	76.5289
RP11-734K23.9	-3.3948	2.1724	-13.4456	1.55427e-38	2.06533e-37	76.4883
RN7SK	-2.57312	5.29008	-13.4451	1.56123e-38	2.07383e-37	76.4839
CXorf21	2.91755	-2.47291	13.445	1.56432e-38	2.07717e-37	76.4819
F2RL1	2.35437	-1.18519	13.441	1.63721e-38	2.17158e-37	76.4367
CTC-537E7.3	4.77505	-7.21788	13.44	1.65863e-38	2.1992e-37	76.4238
CTD-2033A16.2	3.42394	-4.60866	13.439	1.67855e-38	2.22472e-37	76.412
POU3F1	-2.32231	0.429237	-13.4356	1.74406e-38	2.3091e-37	76.3739
RP11-346D14.1	-4.03872	-9.26569	-13.4353	1.75457e-38	2.32218e-37	76.368
RP11-847H18.3	4.43862	-1.0682	13.4341	1.77934e-38	2.35411e-37	76.354
AC002310.11	4.40488	-1.26087	13.4336	1.79011e-38	2.3675e-37	76.3481
RP11-983G14.1	3.28043	-8.71683	13.4322	1.81984e-38	2.40507e-37	76.3317
LINC01340	3.52937	-7.83599	13.4317	1.82853e-38	2.41567e-37	76.327
FOXE3	-3.36737	-5.96492	-13.4311	1.84237e-38	2.43308e-37	76.3195
CHCHD2P9	4.74569	-4.32139	13.4278	1.91467e-38	2.52581e-37	76.2813
RP11-231I16.1	-2.7574	-4.56206	-13.4265	1.94492e-38	2.56479e-37	76.2657
RPL23AP81	5.14702	-3.25574	13.4224	2.04123e-38	2.68888e-37	76.2177
RP11-600F24.1	3.31956	-7.82626	13.4166	2.18633e-38	2.87689e-37	76.1495
RP11-756H6.1	3.96315	-7.54137	13.4162	2.19631e-38	2.88898e-37	76.145
CTD-2012K14.6	-2.4985	-0.0892328	-13.4144	2.2397e-38	2.94392e-37	76.1255
CNTNAP3P1	4.06631	-5.33597	13.4125	2.2937e-38	3.01382e-37	76.1019
CICP13	2.82626	-8.19533	13.4124	2.29507e-38	3.01454e-37	76.1013
TAAR5	2.78676	-8.49691	13.4091	2.38654e-38	3.13242e-37	76.0625
SERHL	-2.5346	-1.30311	-13.407	2.44306e-38	3.20545e-37	76.0392
TACSTD2	-3.14648	-4.56176	-13.4056	2.48689e-38	3.26061e-37	76.0216
SNX29P2	-2.43515	-3.72314	-13.4047	2.51125e-38	3.29018e-37	76.0119
RBP7	-2.30236	0.389628	-13.4046	2.51255e-38	3.2907e-37	76.0114
RP5-877J2.1	4.9159	-5.39727	13.4008	2.63018e-38	3.44229e-37	75.966
RP11-495P10.10	2.60174	-1.5095	13.3983	2.70804e-38	3.54164e-37	75.937
RP11-127L20.3	-4.01013	-6.69749	-13.398	2.71778e-38	3.55248e-37	75.9334
LINC00977	3.29171	-8.1991	13.3934	2.86908e-38	3.74553e-37	75.8796
CTD-2196P11.2	5.08447	-4.62332	13.3931	2.8798e-38	3.75818e-37	75.8759
RP11-1069G10.1	-4.01262	-4.72362	-13.3899	2.98894e-38	3.89782e-37	75.839
AC069368.3	4.83024	-2.4426	13.388	3.05805e-38	3.98509e-37	75.8163
RP11-320H14.1	-3.36148	3.61865	-13.3814	3.30253e-38	4.30215e-37	75.7399
RP11-758N13.1	-4.36878	-4.05022	-13.3781	3.43468e-38	4.4727e-37	75.701
PPP1R8P1	-3.46021	-3.79386	-13.3711	3.72629e-38	4.84724e-37	75.62
RP11-59E19.4	2.719	-8.93795	13.3694	3.8045e-38	4.9472e-37	75.5994
RP11-422N16.3	3.14436	-1.97935	13.3671	3.90583e-38	5.07716e-37	75.5733
TMEM100	2.3277	2.55188	13.3655	3.97335e-38	5.16125e-37	75.5563
HCG16	5.31044	-5.35021	13.3596	4.26766e-38	5.53368e-37	75.4853
ERBB3	-2.13475	2.08363	-13.3577	4.35498e-38	5.6449e-37	75.4652
ABCF2P1	2.79269	-7.63112	13.3558	4.45921e-38	5.77589e-37	75.4417
SOX10	-2.79545	2.89282	-13.3542	4.54779e-38	5.88853e-37	75.4222
PLLP	-2.12305	4.08999	-13.3537	4.56541e-38	5.90925e-37	75.4183
RP11-355F16.1	-3.13771	-7.70172	-13.3516	4.68567e-38	6.0606e-37	75.3926
CDIPT-AS1	-2.18591	-1.01879	-13.3469	4.94207e-38	6.3877e-37	75.3396
CAPN3	-2.38439	3.52049	-13.3387	5.44217e-38	7.03159e-37	75.2439
RXFP1	3.44924	3.08268	13.3374	5.53157e-38	7.14204e-37	75.2278
RP11-381K20.4	-5.32135	-6.57316	-13.3374	5.53443e-38	7.1432e-37	75.2272
GPRIN2	-3.54936	-5.01304	-13.3371	5.55269e-38	7.16423e-37	75.224
C3AR1	2.25073	0.996964	13.3347	5.70221e-38	7.35454e-37	75.1976
RP11-319G9.3	-2.81179	-4.56422	-13.3315	5.92653e-38	7.63845e-37	75.1593
AC007204.2	4.47539	-4.70073	13.33	6.03134e-38	7.7708e-37	75.1419
MIR3976HG	3.43717	-3.59571	13.3263	6.30189e-38	8.11649e-37	75.0983
RP11-1334A24.5	-2.69781	-4.93748	-13.3252	6.37858e-38	8.21237e-37	75.0863
HCG14	5.33148	-4.79051	13.3235	6.51394e-38	8.38367e-37	75.0654
SNHG18	-2.11466	-0.782917	-13.3212	6.67906e-38	8.58406e-37	75.0405
C1QC	2.50641	4.36754	13.3197	6.80246e-38	8.73958e-37	75.0224
RP1-241P17.4	5.3007	1.72132	13.3192	6.85065e-38	8.79838e-37	75.0154
RP11-474I16.8	4.33013	-6.27926	13.3188	6.88191e-38	8.8323e-37	75.0109
PPEF2	-2.9535	-6.27615	-13.3175	6.98504e-38	8.96152e-37	74.9961
RP11-444D3.1	3.99774	-0.951702	13.3128	7.37809e-38	9.45246e-37	74.9417
CPA1	-5.38189	-4.94024	-13.3104	7.58947e-38	9.71303e-37	74.9137
OGDHL	-2.31967	3.69063	-13.3081	7.78662e-38	9.95834e-37	74.8882
KCNE5	-2.9287	-1.30091	-13.3066	7.93478e-38	1.01443e-36	74.8695
CD177	-3.86137	-4.25433	-13.305	8.08335e-38	1.0327e-36	74.8511
LFNG	2.033	3.74631	13.3039	8.17171e-38	1.04362e-36	74.8403
AC007326.9	5.08728	-0.674886	13.3006	8.50643e-38	1.08522e-36	74.8004
CPE	2.12496	9.97983	13.2977	8.78642e-38	1.11938e-36	74.7683
AC007249.3	4.72523	-4.2295	13.2965	8.92419e-38	1.13613e-36	74.7528
SLC30A8	-3.34434	-8.44932	-13.2919	9.42171e-38	1.19864e-36	74.699
ADAMTS7P1	-2.70661	-2.24061	-13.289	9.73944e-38	1.23819e-36	74.666
VCAM1	2.57278	0.30228	13.2842	1.03047e-37	1.30914e-36	74.61
RP11-502F1.1	3.05007	-7.72745	13.2818	1.05942e-37	1.34451e-36	74.5825
RP11-33M22.2	-4.10969	-1.39758	-13.2804	1.07697e-37	1.36631e-36	74.5662
RP11-394O2.3	3.97149	-7.66218	13.2757	1.13842e-37	1.44227e-36	74.5111
AP001891.1	4.56559	-5.57898	13.2701	1.21464e-37	1.5383e-36	74.4467
SNCG	-2.5775	6.45949	-13.2661	1.27158e-37	1.60872e-36	74.4013
DSC3	-3.57643	-7.51519	-13.2653	1.28407e-37	1.62396e-36	74.3916
GYG2P1	-3.8667	-9.71961	-13.2608	1.35398e-37	1.7106e-36	74.3389
GNL3LP1	3.63404	-1.30353	13.2586	1.38851e-37	1.7524e-36	74.3139
RP11-338K13.1	-4.02752	-2.84804	-13.258	1.39822e-37	1.76405e-36	74.307
JAKMIP1	-2.22376	3.8349	-13.2562	1.42514e-37	1.79738e-36	74.288
SMURF2P1	4.31852	-6.97251	13.2554	1.44121e-37	1.81702e-36	74.2769
RYR3	-2.25921	1.99673	-13.2551	1.445e-37	1.82117e-36	74.2743
PKD1L2	-2.07903	-1.11163	-13.2532	1.47688e-37	1.85943e-36	74.2526
SKAP1	-3.21548	-3.50989	-13.2527	1.48865e-37	1.87359e-36	74.2448
LINC00282	-2.72696	-1.3514	-13.2455	1.61833e-37	2.0347e-36	74.1618
BSND	-2.7361	-7.91246	-13.2423	1.68027e-37	2.11112e-36	74.1245
RP11-856M7.1	-2.03811	-10.4215	-13.241	1.70221e-37	2.13795e-36	74.1116
LINC01468	3.71588	-8.01575	13.2409	1.70725e-37	2.14353e-36	74.1087
CD86	2.15427	-0.285643	13.2397	1.72824e-37	2.16914e-36	74.0966
AC092881.1	3.36578	-7.31559	13.2358	1.81135e-37	2.27189e-36	74.05
GCSHP3	6.17806	0.329682	13.2337	1.85637e-37	2.32595e-36	74.0256
PAICSP4	3.58844	-5.02811	13.2335	1.86159e-37	2.33169e-36	74.0228
LRRC7	-2.01797	2.93289	-13.2305	1.92434e-37	2.40863e-36	73.9898
CRYAB	2.7212	9.49735	13.2278	1.98796e-37	2.4857e-36	73.9576
LHX9	4.81597	-6.03381	13.2277	1.9912e-37	2.48889e-36	73.956
DTL	2.48463	-2.93669	13.2273	1.99806e-37	2.49661e-36	73.9525
TKTL1	2.7854	-2.25442	13.2249	2.05703e-37	2.56942e-36	73.9237
PROK1	2.52093	-2.08359	13.2191	2.19781e-37	2.74244e-36	73.8579
CD300LG	3.294	-2.756	13.2154	2.29688e-37	2.86312e-36	73.8142
AC073621.2	4.15363	-5.66798	13.2153	2.29905e-37	2.86484e-36	73.8132
RPS9P1	5.80273	-5.00195	13.2108	2.42419e-37	3.01769e-36	73.7606
RP11-360D2.2	4.83593	-7.70249	13.2104	2.43339e-37	3.0281e-36	73.7569
RP11-45M22.4	4.71482	-2.64231	13.2095	2.46019e-37	3.06041e-36	73.746
RP1-35C21.1	3.96177	-7.94496	13.2075	2.5192e-37	3.13168e-36	73.7224
CRP	-4.73814	-7.50157	-13.207	2.53342e-37	3.14829e-36	73.7169
RP11-403A3.3	2.54597	0.878098	13.2045	2.60666e-37	3.2371e-36	73.6885
LOR	-3.48065	-3.1429	-13.2019	2.68745e-37	3.33287e-36	73.6583
CRCT1	-4.30091	-8.07941	-13.1964	2.86431e-37	3.5498e-36	73.595
RP1-283K11.3	-3.40457	-10.7612	-13.1963	2.86731e-37	3.55231e-36	73.5939
ZNF804B	3.35518	-4.54372	13.1903	3.07584e-37	3.80806e-36	73.5242
MTRNR2L10	-3.02884	-8.89391	-13.1894	3.10591e-37	3.84398e-36	73.5146
TMBIM7P	-2.58168	-10.356	-13.1862	3.22182e-37	3.98338e-36	73.4782
OPN1SW	3.65343	-3.37865	13.1798	3.47303e-37	4.29252e-36	73.4036
RPL12P4	-2.25161	-0.649648	-13.1783	3.52959e-37	4.36094e-36	73.3876
RP11-214C8.2	-3.50516	-4.43424	-13.1748	3.67943e-37	4.54299e-36	73.3463
F5	3.09753	-0.869116	13.1703	3.87888e-37	4.78763e-36	73.2939
CTC-518P12.6	5.31079	-6.38012	13.1657	4.08855e-37	5.043e-36	73.2417
LRRC3C	4.17309	-6.09026	13.1654	4.10701e-37	5.06406e-36	73.2372
RP5-1017F8.2	-5.29966	-5.48611	-13.1614	4.30114e-37	5.29805e-36	73.1913
RP11-361L15.3	-4.52006	1.65106	-13.1559	4.58061e-37	5.63468e-36	73.1288
PRRG3	-3.15291	1.02313	-13.14	5.50912e-37	6.75178e-36	72.9456
RP11-739L10.1	4.05519	-6.85418	13.1358	5.7851e-37	7.08286e-36	72.8971
RP11-497G19.3	5.20867	-5.09364	13.1298	6.19694e-37	7.57945e-36	72.8288
AC004985.12	2.8137	-3.09794	13.1294	6.22636e-37	7.61032e-36	72.8241
LINC00593	3.85082	-7.28134	13.1283	6.30928e-37	7.70909e-36	72.8109
ADGRF5P1	2.89474	-0.475847	13.1277	6.35257e-37	7.75678e-36	72.8042
AC093620.5	3.0745	-1.52227	13.1261	6.47162e-37	7.8995e-36	72.7857
FREM2	2.70869	-1.51805	13.1255	6.51698e-37	7.95219e-36	72.7788
C19orf33	-4.79729	-4.09895	-13.1234	6.67996e-37	8.14289e-36	72.7543
RP13-870H17.3	-3.226	-2.57322	-13.1221	6.7757e-37	8.25684e-36	72.7401
SLC22A31	-4.34431	-5.78113	-13.1212	6.84555e-37	8.3336e-36	72.73
RP1-153P14.5	3.68508	-7.95135	13.1144	7.41079e-37	9.00065e-36	72.6512
CTD-2210P15.3	4.12813	-4.38151	13.1132	7.51561e-37	9.12188e-36	72.6372
RP1-290I10.7	2.95717	-8.73594	13.1063	8.13163e-37	9.86299e-36	72.559
RP11-168O22.1	3.27836	-8.41183	13.1055	8.21282e-37	9.95355e-36	72.5492
DLEU2L	2.03264	-2.35232	13.1034	8.40212e-37	1.01775e-35	72.5265
CNDP1	-3.00443	2.17529	-13.1025	8.50537e-37	1.02992e-35	72.5144
GAD2	-3.19491	2.29987	-13.0978	8.97761e-37	1.08638e-35	72.4608
RP11-664D1.1	4.04569	-7.36978	13.0965	9.10896e-37	1.10154e-35	72.4464
LINC00202-2	-4.62919	-5.16885	-13.0928	9.50506e-37	1.14868e-35	72.4041
CPA5	4.14898	-4.09501	13.0926	9.52864e-37	1.1507e-35	72.4016
RP11-697E2.12	4.95673	-4.15039	13.0926	9.53125e-37	1.1507e-35	72.4014
SPRR2E	-4.67869	-6.63658	-13.0924	9.55245e-37	1.15288e-35	72.3992
SLC7A10	-3.79409	1.54994	-13.0837	1.05659e-36	1.2735e-35	72.299
RP11-395C3.1	5.91881	-3.44837	13.0828	1.06719e-36	1.28585e-35	72.2891
CTC-347C20.1	5.24326	-5.0413	13.0823	1.07331e-36	1.2928e-35	72.2835
RP11-368J22.2	3.93219	-2.82038	13.0754	1.16295e-36	1.39846e-35	72.2038
CRNDE	-3.10574	-3.18211	-13.074	1.18195e-36	1.42083e-35	72.1877
NPM1P6	3.66639	-4.84511	13.0721	1.20779e-36	1.45142e-35	72.1663
RP11-806L2.2	-2.57455	-3.01627	-13.0713	1.21778e-36	1.46246e-35	72.1581
CENPF	2.46077	-0.310319	13.0683	1.26114e-36	1.51353e-35	72.1234
AL133493.2	-2.88635	-5.60225	-13.0632	1.33742e-36	1.60402e-35	72.0651
C11orf42	3.82621	-3.40338	13.057	1.43663e-36	1.72074e-35	71.994
AC011625.1	4.12399	-7.68758	13.0545	1.47983e-36	1.77132e-35	71.9646
AC005822.1	3.47257	-4.13712	13.0491	1.57387e-36	1.88142e-35	71.9034
RP4-559A3.7	4.46856	-3.52728	13.0442	1.66582e-36	1.98937e-35	71.8471
RBAKDN	-4.75591	-3.71173	-13.0421	1.70677e-36	2.03694e-35	71.823
GDI2P1	2.89647	-8.80094	13.0402	1.74473e-36	2.08156e-35	71.8011
AP005530.1	4.09731	-7.28987	13.0392	1.76453e-36	2.1045e-35	71.7899
RP11-483I13.2	-3.00754	-8.7517	-13.0374	1.80098e-36	2.14657e-35	71.7696
SYCE2	2.07004	-0.140148	13.0325	1.90162e-36	2.26207e-35	71.7156
RP11-611O2.5	5.70738	-0.826084	13.0291	1.98218e-36	2.35483e-35	71.6745
AC003991.3	4.28943	-4.19877	13.0257	2.06012e-36	2.44424e-35	71.6362
TREM2	2.26842	2.40788	13.0189	2.22534e-36	2.63597e-35	71.5596
SLCO4A1	-2.19644	2.75904	-13.0178	2.25388e-36	2.66804e-35	71.5469
FAM35DP	2.7346	-4.66147	13.014	2.35836e-36	2.79081e-35	71.502
RP11-777F6.3	4.50884	-3.33274	13.0113	2.43164e-36	2.87567e-35	71.4716
RP11-497G19.1	3.23955	-8.14038	13.0108	2.44528e-36	2.88992e-35	71.466
BCL11A	-2.44385	3.7171	-13.0087	2.50356e-36	2.95688e-35	71.4426
RP11-815J21.4	4.63204	-3.69781	13.0082	2.51873e-36	2.97383e-35	71.4367
RASGRP1	2.14792	2.67991	13.0048	2.61599e-36	3.08767e-35	71.399
LMAN1L	-3.72295	-4.64188	-13.0048	2.6211e-36	3.09269e-35	71.3971
RP11-61E11.2	4.34862	-2.66417	13.0018	2.71095e-36	3.19561e-35	71.3636
RP11-428J1.5	2.35869	-1.63536	13.0013	2.72581e-36	3.21209e-35	71.3582
ZNF807	3.14872	-4.07149	13.0001	2.76727e-36	3.25778e-35	71.3432
VN1R20P	2.24675	0.0863262	12.9954	2.91538e-36	3.42993e-35	71.2915
RP11-184M15.2	3.15921	-8.75123	12.9928	3.00657e-36	3.53379e-35	71.2609
RP11-467L24.1	4.74377	-6.09669	12.9908	3.07797e-36	3.61654e-35	71.2376
ROS1	3.35032	-3.0515	12.9867	3.22542e-36	3.78734e-35	71.1912
RP11-347P5.1	3.25929	-7.21982	12.9845	3.30961e-36	3.88495e-35	71.1656
CHAT	-3.66139	-9.95101	-12.9839	3.33275e-36	3.91086e-35	71.1587
AC100830.3	3.19674	-5.19317	12.9816	3.41886e-36	4.00932e-35	71.1333
RPL5P9	3.50559	-7.83599	12.9789	3.52801e-36	4.13333e-35	71.1021
RP1-199J3.6	2.6132	-3.62332	12.9786	3.54083e-36	4.14701e-35	71.0985
HCG4P3	2.6028	-1.04555	12.9745	3.71004e-36	4.33962e-35	71.0522
LINC00092	-2.07869	1.54513	-12.9742	3.71629e-36	4.34553e-35	71.0505
CLDN16	-3.04361	-4.00996	-12.9685	3.97531e-36	4.64543e-35	70.9836
ANKRD30BL	-3.23107	-1.33633	-12.9619	4.28668e-36	5.00607e-35	70.9088
OXT	-5.04292	-6.02694	-12.9611	4.32416e-36	5.04661e-35	70.9001
[truncated: 4,090 more rows]
